# Supplementary material for: Patterns of Microbiome Variation Among Infrapopulations of Permanent Bloodsucking Parasites
Source: PubMed Central journal article supplement (PMC8085356; doi:10.3389/fmicb.2021.642543), 2021-04-16
Supplement: Data_Sheet_4.pdf [file Data_Sheet_4.pdf]

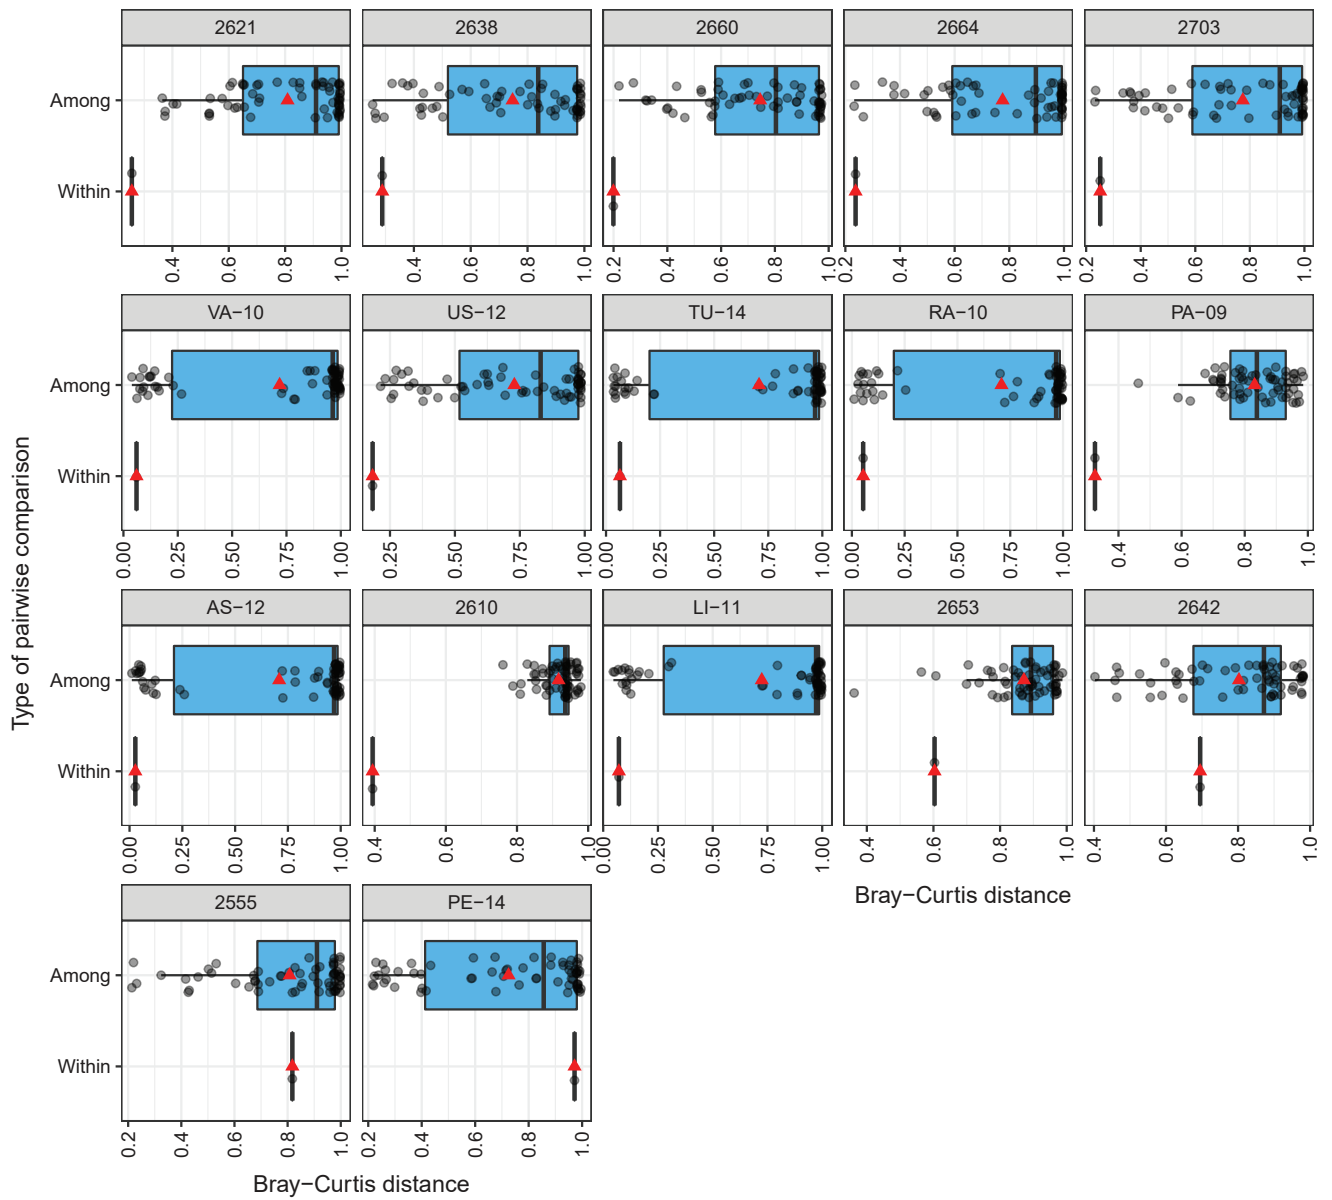

**Figure S4.** Pairwise distances among samples (MAG data). Horizontal solid lines show medians, red triangles show means.
