# Supplementary material for: Patterns of Microbiome Variation Among Infrapopulations of Permanent Bloodsucking Parasites
Source: PubMed Central journal article supplement (PMC8085356; doi:10.3389/fmicb.2021.642543), 2021-04-16
Supplement: Data_Sheet_5.pdf [file Data_Sheet_5.pdf]

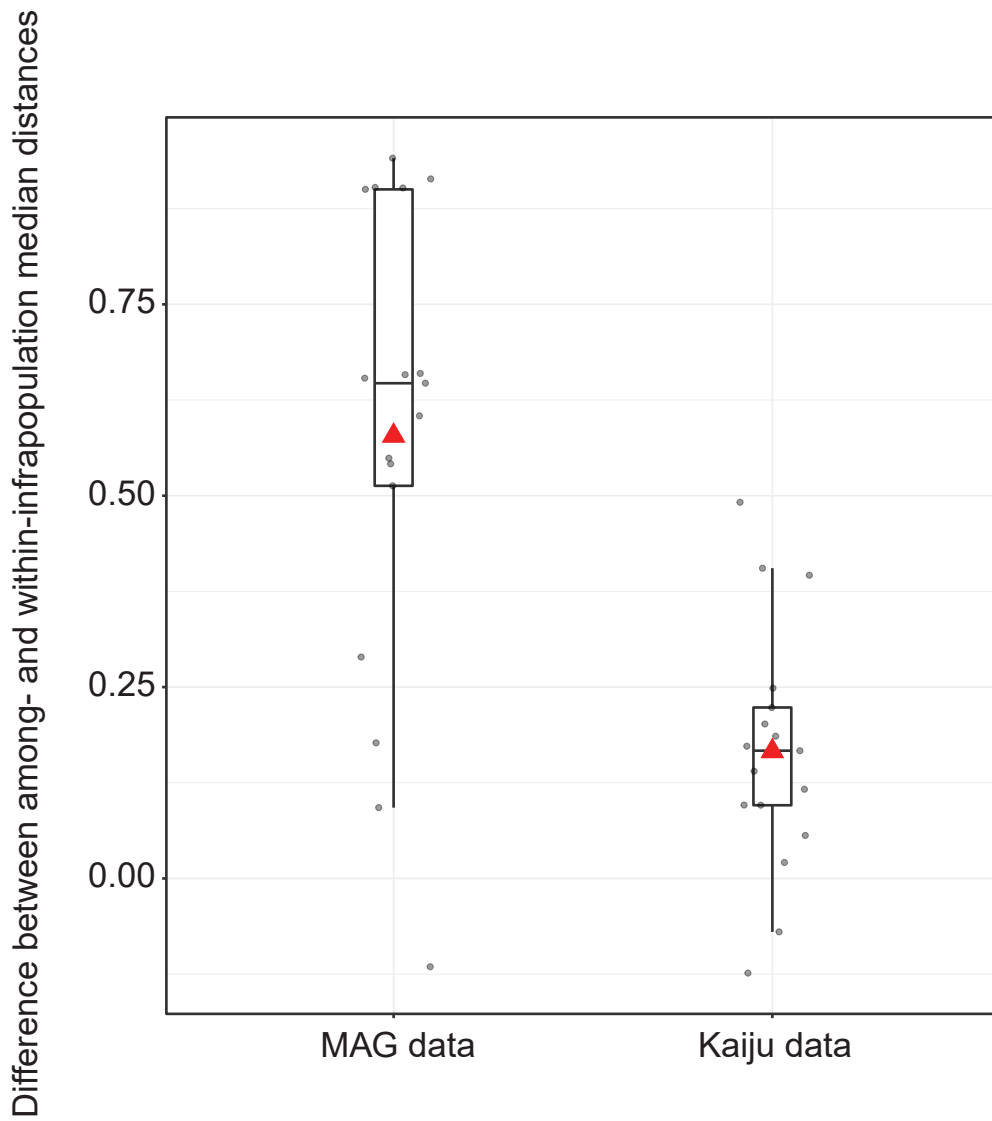

**Figure S5.** Boxplots showing the difference between among- and within-intrapopulation median distances (Bray–Curtis dissimilarity) for the MAG (left) and Kaiju (right) data. Horizontal solid lines show medians and red triangles means.
