# Supplementary material for: Patterns of Microbiome Variation Among Infrapopulations of Permanent Bloodsucking Parasites
Source: Frontiers journal article supplement (doi:10.3389/fmicb.2021.642543), 2021-04-16
Supplement: Table_1.XLS [file Table_1.XLS]

## Sheet: Table_S2
Sample file	Percentaje of reads assigned to this taxon	Number of assigned reads per taxon	Taxon Id	Taxon
Echor02_bacteria.out	2.41405	40509	1883	Streptomyces
Echor02_bacteria.out	2.10453	35315	469	Acinetobacter
Echor02_bacteria.out	1.59185	26712	286	Pseudomonas
Echor02_bacteria.out	1.52177	25536	1386	Bacillus
Echor02_bacteria.out	1.01404	17016	662	Vibrio
Echor02_bacteria.out	0.990913	16628	570	Klebsiella
Echor02_bacteria.out	0.890797	14948	1350	Enterococcus
Echor02_bacteria.out	0.818153	13729	1279	Staphylococcus
Echor02_bacteria.out	0.792766	13303	573657	Candidatus Hodgkinia
Echor02_bacteria.out	0.790085	13258	1023	Microscilla
Echor02_bacteria.out	0.720122	12084	44249	Paenibacillus
Echor02_bacteria.out	0.703436	11804	561	Escherichia
Echor02_bacteria.out	0.690266	11583	1578	Lactobacillus
Echor02_bacteria.out	0.640387	10746	1485	Clostridium
Echor02_bacteria.out	0.54176	9091	1716	Corynebacterium
Echor02_bacteria.out	0.466018	7820	33882	Microbacterium
Echor02_bacteria.out	0.456781	7665	237	Flavobacterium
Echor02_bacteria.out	0.44373	7446	209	Helicobacter
Echor02_bacteria.out	0.427819	7179	69965	Macrococcus
Echor02_bacteria.out	0.42168	7076	1763	Mycobacterium
Echor02_bacteria.out	0.419654	7042	1301	Streptococcus
Echor02_bacteria.out	0.394983	6628	810	Chlamydia
Echor02_bacteria.out	0.38658	6487	953	Wolbachia
Echor02_bacteria.out	0.365901	6140	13687	Sphingomonas
Echor02_bacteria.out	0.353268	5928	32008	Burkholderia
Echor02_bacteria.out	0.328596	5514	1156568	Methylovirgula
Echor02_bacteria.out	0.326689	5482	335927	Thalassobius
Echor02_bacteria.out	0.319002	5353	965	Oceanospirillum
Echor02_bacteria.out	0.315128	5288	194	Campylobacter
Echor02_bacteria.out	0.311791	5232	1839	Nocardioides
Echor02_bacteria.out	0.307917	5167	1866885	Mycolicibacterium
Echor02_bacteria.out	0.306904	5150	59732	Chryseobacterium
Echor02_bacteria.out	0.282888	4747	547	Enterobacter
Echor02_bacteria.out	0.277644	4659	171	Leptospira
Echor02_bacteria.out	0.262031	4397	32	Myxococcus
Echor02_bacteria.out	0.258395	4336	816	Bacteroides
Echor02_bacteria.out	0.254999	4279	374	Bradyrhizobium
Echor02_bacteria.out	0.242901	4076	33926	Candidatus Phytoplasma
Echor02_bacteria.out	0.242722	4073	1817	Nocardia
Echor02_bacteria.out	0.229493	3851	379	Rhizobium
Echor02_bacteria.out	0.217336	3647	68287	Mesorhizobium
Echor02_bacteria.out	0.217097	3643	84567	Pedobacter
Echor02_bacteria.out	0.215012	3608	53335	Pantoea
Echor02_bacteria.out	0.214893	3606	1129	Synechococcus
Echor02_bacteria.out	0.212986	3574	53246	Pseudoalteromonas
Echor02_bacteria.out	0.212568	3567	583	Proteus
Echor02_bacteria.out	0.211377	3547	1873	Micromonospora
Echor02_bacteria.out	0.208278	3495	2093	Mycoplasma
Echor02_bacteria.out	0.208218	3494	79328	Chitinophaga
Echor02_bacteria.out	0.198624	3333	1813	Amycolatopsis
Echor02_bacteria.out	0.191413	3212	334857	Goodfellowiella
Echor02_bacteria.out	0.188254	3159	768	Anaplasma
Echor02_bacteria.out	0.185752	3117	838	Prevotella
Echor02_bacteria.out	0.185156	3107	2745	Halomonas
Echor02_bacteria.out	0.184143	3090	323620	Shinella
Echor02_bacteria.out	0.183964	3087	1988	Actinomadura
Echor02_bacteria.out	0.182712	3066	445	Legionella
Echor02_bacteria.out	0.180448	3028	655184	Candidatus Thioglobus
Echor02_bacteria.out	0.175204	2940	261963	Kangiella
Echor02_bacteria.out	0.168231	2823	724	Haemophilus
Echor02_bacteria.out	0.163285	2740	105	Runella
Echor02_bacteria.out	0.163285	2740	2100210	Caedimonas
Echor02_bacteria.out	0.161199	2705	1663	Arthrobacter
Echor02_bacteria.out	0.159113	2670	2053	Gordonia
Echor02_bacteria.out	0.157564	2644	1822464	Paraburkholderia
Echor02_bacteria.out	0.155776	2614	1827	Rhodococcus
Echor02_bacteria.out	0.15518	2604	40323	Stenotrophomonas
Echor02_bacteria.out	0.15083	2531	246873	Crocinitomix
Echor02_bacteria.out	0.149459	2508	347533	Zobellella
Echor02_bacteria.out	0.148089	2485	590	Salmonella
Echor02_bacteria.out	0.146897	2465	407	Methylobacterium
Echor02_bacteria.out	0.144632	2427	1854	Frankia
Echor02_bacteria.out	0.132297	2220	68	Lysobacter
Echor02_bacteria.out	0.124132	2083	423349	Mucilaginibacter
Echor02_bacteria.out	0.122225	2051	1177	Nostoc
Echor02_bacteria.out	0.120259	2018	872	Desulfovibrio
Echor02_bacteria.out	0.117815	1977	2742	Marinobacter
Echor02_bacteria.out	0.117637	1974	283	Comamonas
Echor02_bacteria.out	0.114717	1925	482	Neisseria
Echor02_bacteria.out	0.111618	1873	22	Shewanella
Echor02_bacteria.out	0.11132	1868	265487	Blastopirellula
Echor02_bacteria.out	0.110664	1857	39643	Sorangium
Echor02_bacteria.out	0.109949	1845	1865	Actinoplanes
Echor02_bacteria.out	0.109234	1833	89966	Hymenobacter
Echor02_bacteria.out	0.105718	1774	690086	Salinarimonas
Echor02_bacteria.out	0.103752	1741	1847	Pseudonocardia
Echor02_bacteria.out	0.102381	1718	83461	Corallococcus
Echor02_bacteria.out	1.98212	33261	10239	Viruses
Echor02_bacteria.out	40.8122	684849	NA	cannot be assigned to a (non-viral) genus
Echor02_bacteria.out	25.0665	420628	NA	belong to a (non-viral) genus with less than 0.1% of all reads
Echor02_bacteria.out	97.4705	64660948	NA	unclassified
Echor03_bacteria.out	9.7724	228513	497	Psychrobacter
Echor03_bacteria.out	7.20063	168376	59732	Chryseobacterium
Echor03_bacteria.out	1.79614	42000	469	Acinetobacter
Echor03_bacteria.out	1.70227	39805	1883	Streptomyces
Echor03_bacteria.out	1.29455	30271	286	Pseudomonas
Echor03_bacteria.out	1.18122	27621	1386	Bacillus
Echor03_bacteria.out	1.01199	23664	1298	Deinococcus
Echor03_bacteria.out	0.853807	19965	475	Moraxella
Echor03_bacteria.out	0.821049	19199	662	Vibrio
Echor03_bacteria.out	0.748476	17502	570	Klebsiella
Echor03_bacteria.out	0.686381	16050	1350	Enterococcus
Echor03_bacteria.out	0.605341	14155	1023	Microscilla
Echor03_bacteria.out	0.570274	13335	1279	Staphylococcus
Echor03_bacteria.out	0.554493	12966	44249	Paenibacillus
Echor03_bacteria.out	0.54594	12766	573657	Candidatus Hodgkinia
Echor03_bacteria.out	0.545427	12754	237	Flavobacterium
Echor03_bacteria.out	0.537088	12559	561	Escherichia
Echor03_bacteria.out	0.524686	12269	1578	Lactobacillus
Echor03_bacteria.out	0.508906	11900	1485	Clostridium
Echor03_bacteria.out	0.412598	9648	34084	Riemerella
Echor03_bacteria.out	0.352086	8233	33882	Microbacterium
Echor03_bacteria.out	0.333184	7791	1301	Streptococcus
Echor03_bacteria.out	0.331045	7741	69965	Macrococcus
Echor03_bacteria.out	0.327453	7657	209	Helicobacter
Echor03_bacteria.out	0.304189	7113	1433995	Cruoricaptor
Echor03_bacteria.out	0.285329	6672	1763	Mycobacterium
Echor03_bacteria.out	0.278102	6503	810	Chlamydia
Echor03_bacteria.out	0.261766	6121	32008	Burkholderia
Echor03_bacteria.out	0.256634	6001	965	Oceanospirillum
Echor03_bacteria.out	0.253469	5927	13687	Sphingomonas
Echor03_bacteria.out	0.249107	5825	953	Wolbachia
Echor03_bacteria.out	0.238416	5575	1839	Nocardioides
Echor03_bacteria.out	0.234481	5483	194	Campylobacter
Echor03_bacteria.out	0.225287	5268	816	Bacteroides
Echor03_bacteria.out	0.223234	5220	1156568	Methylovirgula
Echor03_bacteria.out	0.222464	5202	308865	Elizabethkingia
Echor03_bacteria.out	0.217162	5078	84567	Pedobacter
Echor03_bacteria.out	0.216563	5064	547	Enterobacter
Echor03_bacteria.out	0.213313	4988	1866885	Mycolicibacterium
Echor03_bacteria.out	0.211089	4936	335927	Thalassobius
Echor03_bacteria.out	0.20523	4799	171	Leptospira
Echor03_bacteria.out	0.195394	4569	374	Bradyrhizobium
Echor03_bacteria.out	0.190091	4445	32	Myxococcus
Echor03_bacteria.out	0.184874	4323	79328	Chitinophaga
Echor03_bacteria.out	0.184232	4308	501783	Cloacibacterium
Echor03_bacteria.out	0.179443	4196	2093	Mycoplasma
Echor03_bacteria.out	0.177818	4158	1817	Nocardia
Echor03_bacteria.out	0.175679	4108	53246	Pseudoalteromonas
Echor03_bacteria.out	0.175423	4102	379	Rhizobium
Echor03_bacteria.out	0.173113	4048	68287	Mesorhizobium
Echor03_bacteria.out	0.169136	3955	1129	Synechococcus
Echor03_bacteria.out	0.167212	3910	53335	Pantoea
Echor03_bacteria.out	0.165758	3876	33926	Candidatus Phytoplasma
Echor03_bacteria.out	0.161011	3765	2745	Halomonas
Echor03_bacteria.out	0.157675	3687	1873	Micromonospora
Echor03_bacteria.out	0.154639	3616	838	Prevotella
Echor03_bacteria.out	0.153997	3601	768	Anaplasma
Echor03_bacteria.out	0.151731	3548	583	Proteus
Echor03_bacteria.out	0.15002	3508	724	Haemophilus
Echor03_bacteria.out	0.147069	3439	334857	Goodfellowiella
Echor03_bacteria.out	0.143135	3347	1988	Actinomadura
Echor03_bacteria.out	0.142921	3342	445	Legionella
Echor03_bacteria.out	0.141724	3314	1813	Amycolatopsis
Echor03_bacteria.out	0.13501	3157	655184	Candidatus Thioglobus
Echor03_bacteria.out	0.132829	3106	261963	Kangiella
Echor03_bacteria.out	0.13146	3074	323620	Shinella
Echor03_bacteria.out	0.127953	2992	105	Runella
Echor03_bacteria.out	0.126713	2963	2715289	Amniculibacterium
Echor03_bacteria.out	0.119914	2804	1663	Arthrobacter
Echor03_bacteria.out	0.119614	2797	1827	Rhodococcus
Echor03_bacteria.out	0.117904	2757	1822464	Paraburkholderia
Echor03_bacteria.out	0.117733	2753	28453	Sphingobacterium
Echor03_bacteria.out	0.115723	2706	2053	Gordonia
Echor03_bacteria.out	0.115637	2704	1716	Corynebacterium
Echor03_bacteria.out	0.114226	2671	2100210	Caedimonas
Echor03_bacteria.out	0.113798	2661	246873	Crocinitomix
Echor03_bacteria.out	0.113798	2661	423349	Mucilaginibacter
Echor03_bacteria.out	0.11367	2658	40323	Stenotrophomonas
Echor03_bacteria.out	0.112344	2627	59735	Bergeyella
Echor03_bacteria.out	0.109864	2569	407	Methylobacterium
Echor03_bacteria.out	0.109778	2567	944321	Soonwooa
Echor03_bacteria.out	0.107383	2511	347533	Zobellella
Echor03_bacteria.out	0.102936	2407	590	Salmonella
Echor03_bacteria.out	0.102337	2393	2742	Marinobacter
Echor03_bacteria.out	0.10084	2358	872	Desulfovibrio
Echor03_bacteria.out	1.66592	38955	10239	Viruses
Echor03_bacteria.out	33.7398	788955	NA	cannot be assigned to a (non-viral) genus
Echor03_bacteria.out	21.0775	492865	NA	belong to a (non-viral) genus with less than 0.1% of all reads
Echor03_bacteria.out	96.7722	70104919	NA	unclassified
Echor04_bacteria.out	2.68202	46577	1883	Streptomyces
Echor04_bacteria.out	2.34856	40786	469	Acinetobacter
Echor04_bacteria.out	1.79801	31225	1279	Staphylococcus
Echor04_bacteria.out	1.44532	25100	286	Pseudomonas
Echor04_bacteria.out	1.43098	24851	1386	Bacillus
Echor04_bacteria.out	1.28231	22269	573657	Candidatus Hodgkinia
Echor04_bacteria.out	0.883604	15345	662	Vibrio
Echor04_bacteria.out	0.881934	15316	1298	Deinococcus
Echor04_bacteria.out	0.864602	15015	570	Klebsiella
Echor04_bacteria.out	0.803104	13947	1350	Enterococcus
Echor04_bacteria.out	0.734753	12760	561	Escherichia
Echor04_bacteria.out	0.688572	11958	1023	Microscilla
Echor04_bacteria.out	0.668706	11613	953	Wolbachia
Echor04_bacteria.out	0.641182	11135	1156568	Methylovirgula
Echor04_bacteria.out	0.63456	11020	1578	Lactobacillus
Echor04_bacteria.out	0.611412	10618	44249	Paenibacillus
Echor04_bacteria.out	0.559242	9712	1485	Clostridium
Echor04_bacteria.out	0.498032	8649	1301	Streptococcus
Echor04_bacteria.out	0.486745	8453	335927	Thalassobius
Echor04_bacteria.out	0.481908	8369	59732	Chryseobacterium
Echor04_bacteria.out	0.463712	8053	810	Chlamydia
Echor04_bacteria.out	0.448971	7797	33926	Candidatus Phytoplasma
Echor04_bacteria.out	0.419316	7282	482	Neisseria
Echor04_bacteria.out	0.409642	7114	33882	Microbacterium
Echor04_bacteria.out	0.409297	7108	194	Campylobacter
Echor04_bacteria.out	0.395707	6872	237	Flavobacterium
Echor04_bacteria.out	0.392368	6814	69965	Macrococcus
Echor04_bacteria.out	0.392195	6811	1763	Mycobacterium
Echor04_bacteria.out	0.374114	6497	209	Helicobacter
Echor04_bacteria.out	0.349469	6069	323620	Shinella
Echor04_bacteria.out	0.319641	5551	32008	Burkholderia
Echor04_bacteria.out	0.315092	5472	965	Oceanospirillum
Echor04_bacteria.out	0.287452	4992	13687	Sphingomonas
Echor04_bacteria.out	0.286128	4969	1839	Nocardioides
Echor04_bacteria.out	0.271675	4718	1866885	Mycolicibacterium
Echor04_bacteria.out	0.261367	4539	1854	Frankia
Echor04_bacteria.out	0.258834	4495	1827	Rhodococcus
Echor04_bacteria.out	0.256645	4457	2100210	Caedimonas
Echor04_bacteria.out	0.254342	4417	547	Enterobacter
Echor04_bacteria.out	0.252154	4379	1716	Corynebacterium
Echor04_bacteria.out	0.243805	4234	171	Leptospira
Echor04_bacteria.out	0.233382	4053	32	Myxococcus
Echor04_bacteria.out	0.229409	3984	497	Psychrobacter
Echor04_bacteria.out	0.226875	3940	816	Bacteroides
Echor04_bacteria.out	0.223363	3879	1817	Nocardia
Echor04_bacteria.out	0.22129	3843	374	Bradyrhizobium
Echor04_bacteria.out	0.216165	3754	768	Anaplasma
Echor04_bacteria.out	0.205051	3561	379	Rhizobium
Echor04_bacteria.out	0.201712	3503	334857	Goodfellowiella
Echor04_bacteria.out	0.193823	3366	84567	Pedobacter
Echor04_bacteria.out	0.192844	3349	1873	Micromonospora
Echor04_bacteria.out	0.192383	3341	68287	Mesorhizobium
Echor04_bacteria.out	0.189389	3289	37914	Dietzia
Echor04_bacteria.out	0.187316	3253	246873	Crocinitomix
Echor04_bacteria.out	0.184898	3211	1129	Synechococcus
Echor04_bacteria.out	0.184725	3208	53335	Pantoea
Echor04_bacteria.out	0.183458	3186	1663	Arthrobacter
Echor04_bacteria.out	0.181788	3157	2093	Mycoplasma
Echor04_bacteria.out	0.1815	3152	655184	Candidatus Thioglobus
Echor04_bacteria.out	0.178103	3093	583	Proteus
Echor04_bacteria.out	0.175915	3055	53246	Pseudoalteromonas
Echor04_bacteria.out	0.171999	2987	1813	Amycolatopsis
Echor04_bacteria.out	0.171596	2980	79328	Chitinophaga
Echor04_bacteria.out	0.164283	2853	1988	Actinomadura
Echor04_bacteria.out	0.163247	2835	838	Prevotella
Echor04_bacteria.out	0.158179	2747	445	Legionella
Echor04_bacteria.out	0.156509	2718	2745	Halomonas
Echor04_bacteria.out	0.153458	2665	261963	Kangiella
Echor04_bacteria.out	0.151557	2632	724	Haemophilus
Echor04_bacteria.out	0.144647	2512	2053	Gordonia
Echor04_bacteria.out	0.144647	2512	1822464	Paraburkholderia
Echor04_bacteria.out	0.14459	2511	105	Runella
Echor04_bacteria.out	0.136355	2368	590	Salmonella
Echor04_bacteria.out	0.134398	2334	68	Lysobacter
Echor04_bacteria.out	0.133937	2326	40323	Stenotrophomonas
Echor04_bacteria.out	0.130252	2262	407	Methylobacterium
Echor04_bacteria.out	0.129676	2252	347533	Zobellella
Echor04_bacteria.out	0.108601	1886	89966	Hymenobacter
Echor04_bacteria.out	0.107391	1865	283	Comamonas
Echor04_bacteria.out	0.106643	1852	1177	Nostoc
Echor04_bacteria.out	0.106643	1852	423349	Mucilaginibacter
Echor04_bacteria.out	0.106182	1844	872	Desulfovibrio
Echor04_bacteria.out	0.103303	1794	2742	Marinobacter
Echor04_bacteria.out	0.100309	1742	39643	Sorangium
Echor04_bacteria.out	1.76289	30615	10239	Viruses
Echor04_bacteria.out	40.8327	709116	NA	cannot be assigned to a (non-viral) genus
Echor04_bacteria.out	22.8051	396042	NA	belong to a (non-viral) genus with less than 0.1% of all reads
Echor04_bacteria.out	97.2218	60773732	NA	unclassified
Echor17_bacteria.out	2.38509	19075	1883	Streptomyces
Echor17_bacteria.out	2.13088	17042	469	Acinetobacter
Echor17_bacteria.out	1.49682	11971	286	Pseudomonas
Echor17_bacteria.out	1.43168	11450	1386	Bacillus
Echor17_bacteria.out	1.13471	9075	573657	Candidatus Hodgkinia
Echor17_bacteria.out	1.0832	8663	1279	Staphylococcus
Echor17_bacteria.out	1.01693	8133	497	Psychrobacter
Echor17_bacteria.out	0.965037	7718	662	Vibrio
Echor17_bacteria.out	0.910896	7285	570	Klebsiella
Echor17_bacteria.out	0.830872	6645	1350	Enterococcus
Echor17_bacteria.out	0.764727	6116	1023	Microscilla
Echor17_bacteria.out	0.686704	5492	561	Escherichia
Echor17_bacteria.out	0.663948	5310	1578	Lactobacillus
Echor17_bacteria.out	0.662447	5298	44249	Paenibacillus
Echor17_bacteria.out	0.609056	4871	1485	Clostridium
Echor17_bacteria.out	0.552664	4420	953	Wolbachia
Echor17_bacteria.out	0.500024	3999	1156568	Methylovirgula
Echor17_bacteria.out	0.490021	3919	335927	Thalassobius
Echor17_bacteria.out	0.445257	3561	237	Flavobacterium
Echor17_bacteria.out	0.426502	3411	33882	Microbacterium
Echor17_bacteria.out	0.417999	3343	1301	Streptococcus
Echor17_bacteria.out	0.411247	3289	69965	Macrococcus
Echor17_bacteria.out	0.406871	3254	209	Helicobacter
Echor17_bacteria.out	0.40362	3228	810	Chlamydia
Echor17_bacteria.out	0.401119	3208	32008	Burkholderia
Echor17_bacteria.out	0.375237	3001	1763	Mycobacterium
Echor17_bacteria.out	0.367609	2940	13687	Sphingomonas
Echor17_bacteria.out	0.366234	2929	33926	Candidatus Phytoplasma
Echor17_bacteria.out	0.365109	2920	194	Campylobacter
Echor17_bacteria.out	0.338601	2708	965	Oceanospirillum
Echor17_bacteria.out	0.323846	2590	59732	Chryseobacterium
Echor17_bacteria.out	0.321721	2573	323620	Shinella
Echor17_bacteria.out	0.295213	2361	1839	Nocardioides
Echor17_bacteria.out	0.294213	2353	1866885	Mycolicibacterium
Echor17_bacteria.out	0.272456	2179	547	Enterobacter
Echor17_bacteria.out	0.247574	1980	816	Bacteroides
Echor17_bacteria.out	0.244323	1954	171	Leptospira
Echor17_bacteria.out	0.243447	1947	32	Myxococcus
Echor17_bacteria.out	0.242322	1938	374	Bradyrhizobium
Echor17_bacteria.out	0.236945	1895	1716	Corynebacterium
Echor17_bacteria.out	0.229943	1839	2100210	Caedimonas
Echor17_bacteria.out	0.227943	1823	1817	Nocardia
Echor17_bacteria.out	0.227193	1817	1298	Deinococcus
Echor17_bacteria.out	0.226067	1808	583	Proteus
Echor17_bacteria.out	0.220065	1760	379	Rhizobium
Echor17_bacteria.out	0.218065	1744	2093	Mycoplasma
Echor17_bacteria.out	0.217815	1742	768	Anaplasma
Echor17_bacteria.out	0.205936	1647	53335	Pantoea
Echor17_bacteria.out	0.201435	1611	68287	Mesorhizobium
Echor17_bacteria.out	0.201185	1609	334857	Goodfellowiella
Echor17_bacteria.out	0.196934	1575	53246	Pseudoalteromonas
Echor17_bacteria.out	0.195433	1563	84567	Pedobacter
Echor17_bacteria.out	0.192807	1542	1873	Micromonospora
Echor17_bacteria.out	0.191057	1528	79328	Chitinophaga
Echor17_bacteria.out	0.190432	1523	1129	Synechococcus
Echor17_bacteria.out	0.189056	1512	655184	Candidatus Thioglobus
Echor17_bacteria.out	0.185055	1480	838	Prevotella
Echor17_bacteria.out	0.181804	1454	246873	Crocinitomix
Echor17_bacteria.out	0.180054	1440	1813	Amycolatopsis
Echor17_bacteria.out	0.174427	1395	2745	Halomonas
Echor17_bacteria.out	0.173177	1385	445	Legionella
Echor17_bacteria.out	0.164674	1317	1988	Actinomadura
Echor17_bacteria.out	0.163549	1308	261963	Kangiella
Echor17_bacteria.out	0.163049	1304	724	Haemophilus
Echor17_bacteria.out	0.15217	1217	2053	Gordonia
Echor17_bacteria.out	0.147419	1179	105	Runella
Echor17_bacteria.out	0.143668	1149	40323	Stenotrophomonas
Echor17_bacteria.out	0.141917	1135	1663	Arthrobacter
Echor17_bacteria.out	0.141167	1129	347533	Zobellella
Echor17_bacteria.out	0.137541	1100	1822464	Paraburkholderia
Echor17_bacteria.out	0.133665	1069	407	Methylobacterium
Echor17_bacteria.out	0.13329	1066	1854	Frankia
Echor17_bacteria.out	0.131789	1054	1827	Rhodococcus
Echor17_bacteria.out	0.127413	1019	590	Salmonella
Echor17_bacteria.out	0.123287	986	423349	Mucilaginibacter
Echor17_bacteria.out	0.121911	975	482	Neisseria
Echor17_bacteria.out	0.121786	974	68	Lysobacter
Echor17_bacteria.out	0.116035	928	872	Desulfovibrio
Echor17_bacteria.out	0.113284	906	2742	Marinobacter
Echor17_bacteria.out	0.111158	889	1177	Nostoc
Echor17_bacteria.out	0.108532	868	283	Comamonas
Echor17_bacteria.out	0.10203	816	89966	Hymenobacter
Echor17_bacteria.out	0.10178	814	1865	Actinoplanes
Echor17_bacteria.out	0.10003	800	22	Shewanella
Echor17_bacteria.out	1.91444	15311	10239	Viruses
Echor17_bacteria.out	41.3694	330857	NA	cannot be assigned to a (non-viral) genus
Echor17_bacteria.out	23.7259	189751	NA	belong to a (non-viral) genus with less than 0.1% of all reads
Echor17_bacteria.out	97.3737	29652194	NA	unclassified
Echor18_bacteria.out	2.46025	16920	1883	Streptomyces
Echor18_bacteria.out	2.06867	14227	469	Acinetobacter
Echor18_bacteria.out	1.59814	10991	286	Pseudomonas
Echor18_bacteria.out	1.51948	10450	1386	Bacillus
Echor18_bacteria.out	1.02438	7045	662	Vibrio
Echor18_bacteria.out	0.988606	6799	570	Klebsiella
Echor18_bacteria.out	0.89104	6128	1350	Enterococcus
Echor18_bacteria.out	0.805978	5543	1023	Microscilla
Echor18_bacteria.out	0.737492	5072	1279	Staphylococcus
Echor18_bacteria.out	0.70245	4831	44249	Paenibacillus
Echor18_bacteria.out	0.691835	4758	561	Escherichia
Echor18_bacteria.out	0.672496	4625	573657	Candidatus Hodgkinia
Echor18_bacteria.out	0.669152	4602	1578	Lactobacillus
Echor18_bacteria.out	0.649232	4465	1485	Clostridium
Echor18_bacteria.out	0.60183	4139	32008	Burkholderia
Echor18_bacteria.out	0.475764	3272	33882	Microbacterium
Echor18_bacteria.out	0.47271	3251	237	Flavobacterium
Echor18_bacteria.out	0.449737	3093	209	Helicobacter
Echor18_bacteria.out	0.430107	2958	69965	Macrococcus
Echor18_bacteria.out	0.424291	2918	1763	Mycobacterium
Echor18_bacteria.out	0.400444	2754	1301	Streptococcus
Echor18_bacteria.out	0.360458	2479	13687	Sphingomonas
Echor18_bacteria.out	0.355514	2445	810	Chlamydia
Echor18_bacteria.out	0.338938	2331	953	Wolbachia
Echor18_bacteria.out	0.324543	2232	965	Oceanospirillum
Echor18_bacteria.out	0.318291	2189	1866885	Mycolicibacterium
Echor18_bacteria.out	0.317855	2186	194	Campylobacter
Echor18_bacteria.out	0.314946	2166	59732	Chryseobacterium
Echor18_bacteria.out	0.311893	2145	1839	Nocardioides
Echor18_bacteria.out	0.307967	2118	335927	Thalassobius
Echor18_bacteria.out	0.296916	2042	547	Enterobacter
Echor18_bacteria.out	0.268708	1848	1156568	Methylovirgula
Echor18_bacteria.out	0.266817	1835	32	Myxococcus
Echor18_bacteria.out	0.265509	1826	171	Leptospira
Echor18_bacteria.out	0.261583	1799	1817	Nocardia
Echor18_bacteria.out	0.251405	1729	33926	Candidatus Phytoplasma
Echor18_bacteria.out	0.249224	1714	374	Bradyrhizobium
Echor18_bacteria.out	0.248497	1709	816	Bacteroides
Echor18_bacteria.out	0.240645	1655	84567	Pedobacter
Echor18_bacteria.out	0.239772	1649	379	Rhizobium
Echor18_bacteria.out	0.233374	1605	53335	Pantoea
Echor18_bacteria.out	0.227558	1565	1129	Synechococcus
Echor18_bacteria.out	0.225813	1553	68287	Mesorhizobium
Echor18_bacteria.out	0.224214	1542	2093	Mycoplasma
Echor18_bacteria.out	0.21549	1482	1873	Micromonospora
Echor18_bacteria.out	0.213018	1465	583	Proteus
Echor18_bacteria.out	0.207347	1426	53246	Pseudoalteromonas
Echor18_bacteria.out	0.201531	1386	1813	Amycolatopsis
Echor18_bacteria.out	0.198477	1365	79328	Chitinophaga
Echor18_bacteria.out	0.19746	1358	1988	Actinomadura
Echor18_bacteria.out	0.186409	1282	445	Legionella
Echor18_bacteria.out	0.182483	1255	768	Anaplasma
Echor18_bacteria.out	0.182483	1255	2745	Halomonas
Echor18_bacteria.out	0.17972	1236	334857	Goodfellowiella
Echor18_bacteria.out	0.177539	1221	1716	Corynebacterium
Echor18_bacteria.out	0.173322	1192	1822464	Paraburkholderia
Echor18_bacteria.out	0.173177	1191	838	Prevotella
Echor18_bacteria.out	0.171723	1181	724	Haemophilus
Echor18_bacteria.out	0.171577	1180	261963	Kangiella
Echor18_bacteria.out	0.169978	1169	655184	Candidatus Thioglobus
Echor18_bacteria.out	0.164889	1134	323620	Shinella
Echor18_bacteria.out	0.164162	1129	2053	Gordonia
Echor18_bacteria.out	0.16169	1112	105	Runella
Echor18_bacteria.out	0.159073	1094	1663	Arthrobacter
Echor18_bacteria.out	0.157909	1086	40323	Stenotrophomonas
Echor18_bacteria.out	0.157037	1080	1827	Rhodococcus
Echor18_bacteria.out	0.150203	1033	246873	Crocinitomix
Echor18_bacteria.out	0.148604	1022	590	Salmonella
Echor18_bacteria.out	0.146568	1008	347533	Zobellella
Echor18_bacteria.out	0.144823	996	68	Lysobacter
Echor18_bacteria.out	0.143224	985	407	Methylobacterium
Echor18_bacteria.out	0.140606	967	1854	Frankia
Echor18_bacteria.out	0.12563	864	2100210	Caedimonas
Echor18_bacteria.out	0.125339	862	283	Comamonas
Echor18_bacteria.out	0.124757	858	872	Desulfovibrio
Echor18_bacteria.out	0.124321	855	423349	Mucilaginibacter
Echor18_bacteria.out	0.119523	822	1177	Nostoc
Echor18_bacteria.out	0.117923	811	39643	Sorangium
Echor18_bacteria.out	0.117487	808	2742	Marinobacter
Echor18_bacteria.out	0.116905	804	89966	Hymenobacter
Echor18_bacteria.out	0.113561	781	12916	Acidovorax
Echor18_bacteria.out	0.110944	763	1847	Pseudonocardia
Echor18_bacteria.out	0.110362	759	2370	Xylella
Echor18_bacteria.out	0.10949	753	265487	Blastopirellula
Echor18_bacteria.out	0.106582	733	482	Neisseria
Echor18_bacteria.out	0.106582	733	1865	Actinoplanes
Echor18_bacteria.out	0.106436	732	182639	Kribbella
Echor18_bacteria.out	0.106291	731	22	Shewanella
Echor18_bacteria.out	0.103092	709	34072	Variovorax
Echor18_bacteria.out	0.102946	708	1612611	Pararhizobium
Echor18_bacteria.out	0.100765	693	83461	Corallococcus
Echor18_bacteria.out	2.05907	14161	10239	Viruses
Echor18_bacteria.out	40.7524	280269	NA	cannot be assigned to a (non-viral) genus
Echor18_bacteria.out	25.0145	172034	NA	belong to a (non-viral) genus with less than 0.1% of all reads
Echor18_bacteria.out	97.465	26441463	NA	unclassified
Echor19_bacteria.out	8.14991	62690	497	Psychrobacter
Echor19_bacteria.out	4.21575	32428	59732	Chryseobacterium
Echor19_bacteria.out	1.9143	14725	1883	Streptomyces
Echor19_bacteria.out	1.89441	14572	469	Acinetobacter
Echor19_bacteria.out	1.25492	9653	573657	Candidatus Hodgkinia
Echor19_bacteria.out	1.21124	9317	286	Pseudomonas
Echor19_bacteria.out	1.12297	8638	1386	Bacillus
Echor19_bacteria.out	1.0945	8419	1279	Staphylococcus
Echor19_bacteria.out	0.833321	6410	1298	Deinococcus
Echor19_bacteria.out	0.77677	5975	662	Vibrio
Echor19_bacteria.out	0.734389	5649	475	Moraxella
Echor19_bacteria.out	0.708518	5450	570	Klebsiella
Echor19_bacteria.out	0.642996	4946	1350	Enterococcus
Echor19_bacteria.out	0.642217	4940	1156568	Methylovirgula
Echor19_bacteria.out	0.616346	4741	953	Wolbachia
Echor19_bacteria.out	0.599445	4611	1023	Microscilla
Echor19_bacteria.out	0.590345	4541	561	Escherichia
Echor19_bacteria.out	0.539514	4150	1578	Lactobacillus
Echor19_bacteria.out	0.525344	4041	44249	Paenibacillus
Echor19_bacteria.out	0.493233	3794	13687	Sphingomonas
Echor19_bacteria.out	0.488683	3759	335927	Thalassobius
Echor19_bacteria.out	0.448512	3450	1485	Clostridium
Echor19_bacteria.out	0.429011	3300	237	Flavobacterium
Echor19_bacteria.out	0.38832	2987	33926	Candidatus Phytoplasma
Echor19_bacteria.out	0.38559	2966	323620	Shinella
Echor19_bacteria.out	0.37727	2902	1301	Streptococcus
Echor19_bacteria.out	0.335279	2579	32008	Burkholderia
Echor19_bacteria.out	0.334239	2571	33882	Microbacterium
Echor19_bacteria.out	0.323318	2487	810	Chlamydia
Echor19_bacteria.out	0.313178	2409	69965	Macrococcus
Echor19_bacteria.out	0.310318	2387	194	Campylobacter
Echor19_bacteria.out	0.294458	2265	209	Helicobacter
Echor19_bacteria.out	0.283797	2183	1763	Mycobacterium
Echor19_bacteria.out	0.277947	2138	2100210	Caedimonas
Echor19_bacteria.out	0.257407	1980	965	Oceanospirillum
Echor19_bacteria.out	0.240376	1849	34084	Riemerella
Echor19_bacteria.out	0.228806	1760	1839	Nocardioides
Echor19_bacteria.out	0.225686	1736	1866885	Mycolicibacterium
Echor19_bacteria.out	0.211515	1627	816	Bacteroides
Echor19_bacteria.out	0.208655	1605	547	Enterobacter
Echor19_bacteria.out	0.205535	1581	768	Anaplasma
Echor19_bacteria.out	0.203065	1562	171	Leptospira
Echor19_bacteria.out	0.199165	1532	84567	Pedobacter
Echor19_bacteria.out	0.192795	1483	32	Myxococcus
Echor19_bacteria.out	0.187075	1439	246873	Crocinitomix
Echor19_bacteria.out	0.184735	1421	374	Bradyrhizobium
Echor19_bacteria.out	0.184735	1421	1433995	Cruoricaptor
Echor19_bacteria.out	0.173814	1337	334857	Goodfellowiella
Echor19_bacteria.out	0.171864	1322	655184	Candidatus Thioglobus
Echor19_bacteria.out	0.168614	1297	1817	Nocardia
Echor19_bacteria.out	0.164324	1264	53335	Pantoea
Echor19_bacteria.out	0.162114	1247	79328	Chitinophaga
Echor19_bacteria.out	0.160944	1238	68287	Mesorhizobium
Echor19_bacteria.out	0.159254	1225	379	Rhizobium
Echor19_bacteria.out	0.157304	1210	2093	Mycoplasma
Echor19_bacteria.out	0.152104	1170	1129	Synechococcus
Echor19_bacteria.out	0.151324	1164	53246	Pseudoalteromonas
Echor19_bacteria.out	0.148074	1139	2745	Halomonas
Echor19_bacteria.out	0.145734	1121	1873	Micromonospora
Echor19_bacteria.out	0.143134	1101	583	Proteus
Echor19_bacteria.out	0.140274	1079	1813	Amycolatopsis
Echor19_bacteria.out	0.138844	1068	1988	Actinomadura
Echor19_bacteria.out	0.137934	1061	445	Legionella
Echor19_bacteria.out	0.137674	1059	308865	Elizabethkingia
Echor19_bacteria.out	0.133643	1028	261963	Kangiella
Echor19_bacteria.out	0.132083	1016	838	Prevotella
Echor19_bacteria.out	0.130133	1001	724	Haemophilus
Echor19_bacteria.out	0.118433	911	105	Runella
Echor19_bacteria.out	0.117133	901	1827	Rhodococcus
Echor19_bacteria.out	0.116483	896	1822464	Paraburkholderia
Echor19_bacteria.out	0.116223	894	40323	Stenotrophomonas
Echor19_bacteria.out	0.116093	893	2053	Gordonia
Echor19_bacteria.out	0.115053	885	1716	Corynebacterium
Echor19_bacteria.out	0.114663	882	1663	Arthrobacter
Echor19_bacteria.out	0.106083	816	347533	Zobellella
Echor19_bacteria.out	0.103743	798	407	Methylobacterium
Echor19_bacteria.out	0.103093	793	501783	Cloacibacterium
Echor19_bacteria.out	0.101403	780	423349	Mucilaginibacter
Echor19_bacteria.out	0.101273	779	590	Salmonella
Echor19_bacteria.out	0.100623	774	68	Lysobacter
Echor19_bacteria.out	1.54691	11899	10239	Viruses
Echor19_bacteria.out	37.5164	288580	NA	cannot be assigned to a (non-viral) genus
Echor19_bacteria.out	20.2173	155514	NA	belong to a (non-viral) genus with less than 0.1% of all reads
Echor19_bacteria.out	96.7509	22905538	NA	unclassified
Echor20_bacteria.out	2.43002	15358	1883	Streptomyces
Echor20_bacteria.out	2.17987	13777	469	Acinetobacter
Echor20_bacteria.out	1.60883	10168	573657	Candidatus Hodgkinia
Echor20_bacteria.out	1.43779	9087	1279	Staphylococcus
Echor20_bacteria.out	1.36089	8601	286	Pseudomonas
Echor20_bacteria.out	1.28415	8116	1386	Bacillus
Echor20_bacteria.out	0.855523	5407	662	Vibrio
Echor20_bacteria.out	0.836378	5286	59732	Chryseobacterium
Echor20_bacteria.out	0.826726	5225	953	Wolbachia
Echor20_bacteria.out	0.815176	5152	570	Klebsiella
Echor20_bacteria.out	0.793974	5018	13687	Sphingomonas
Echor20_bacteria.out	0.780999	4936	1156568	Methylovirgula
Echor20_bacteria.out	0.737487	4661	561	Escherichia
Echor20_bacteria.out	0.735588	4649	1350	Enterococcus
Echor20_bacteria.out	0.661223	4179	1023	Microscilla
Echor20_bacteria.out	0.618344	3908	1298	Deinococcus
Echor20_bacteria.out	0.611856	3867	1578	Lactobacillus
Echor20_bacteria.out	0.600622	3796	44249	Paenibacillus
Echor20_bacteria.out	0.569452	3599	335927	Thalassobius
Echor20_bacteria.out	0.54018	3414	1485	Clostridium
Echor20_bacteria.out	0.525465	3321	1716	Corynebacterium
Echor20_bacteria.out	0.508061	3211	33926	Candidatus Phytoplasma
Echor20_bacteria.out	0.471985	2983	323620	Shinella
Echor20_bacteria.out	0.466131	2946	1301	Streptococcus
Echor20_bacteria.out	0.441448	2790	810	Chlamydia
Echor20_bacteria.out	0.430372	2720	32008	Burkholderia
Echor20_bacteria.out	0.427524	2702	237	Flavobacterium
Echor20_bacteria.out	0.399202	2523	69965	Macrococcus
Echor20_bacteria.out	0.374044	2364	209	Helicobacter
Echor20_bacteria.out	0.373728	2362	194	Campylobacter
Echor20_bacteria.out	0.36993	2338	497	Psychrobacter
Echor20_bacteria.out	0.368981	2332	33882	Microbacterium
Echor20_bacteria.out	0.338127	2137	1763	Mycobacterium
Echor20_bacteria.out	0.333855	2110	2100210	Caedimonas
Echor20_bacteria.out	0.295564	1868	965	Oceanospirillum
Echor20_bacteria.out	0.273097	1726	246873	Crocinitomix
Echor20_bacteria.out	0.271198	1714	1839	Nocardioides
Echor20_bacteria.out	0.269932	1706	1866885	Mycolicibacterium
Echor20_bacteria.out	0.266768	1686	768	Anaplasma
Echor20_bacteria.out	0.246831	1560	547	Enterobacter
Echor20_bacteria.out	0.23085	1459	32	Myxococcus
Echor20_bacteria.out	0.226737	1433	655184	Candidatus Thioglobus
Echor20_bacteria.out	0.223889	1415	334857	Goodfellowiella
Echor20_bacteria.out	0.222464	1406	816	Bacteroides
Echor20_bacteria.out	0.220882	1396	171	Leptospira
Echor20_bacteria.out	0.20775	1313	374	Bradyrhizobium
Echor20_bacteria.out	0.204269	1291	1817	Nocardia
Echor20_bacteria.out	0.192876	1219	84567	Pedobacter
Echor20_bacteria.out	0.185914	1175	68287	Mesorhizobium
Echor20_bacteria.out	0.184174	1164	1129	Synechococcus
Echor20_bacteria.out	0.181642	1148	379	Rhizobium
Echor20_bacteria.out	0.18006	1138	53335	Pantoea
Echor20_bacteria.out	0.178794	1130	53246	Pseudoalteromonas
Echor20_bacteria.out	0.173889	1099	583	Proteus
Echor20_bacteria.out	0.172465	1090	2093	Mycoplasma
Echor20_bacteria.out	0.171041	1081	1873	Micromonospora
Echor20_bacteria.out	0.168352	1064	1813	Amycolatopsis
Echor20_bacteria.out	0.164396	1039	1663	Arthrobacter
Echor20_bacteria.out	0.160757	1016	79328	Chitinophaga
Echor20_bacteria.out	0.158225	1000	838	Prevotella
Echor20_bacteria.out	0.156959	992	1988	Actinomadura
Echor20_bacteria.out	0.153162	968	261963	Kangiella
Echor20_bacteria.out	0.152213	962	2745	Halomonas
Echor20_bacteria.out	0.149048	942	445	Legionella
Echor20_bacteria.out	0.147624	933	724	Haemophilus
Echor20_bacteria.out	0.146675	927	1822464	Paraburkholderia
Echor20_bacteria.out	0.141611	895	2053	Gordonia
Echor20_bacteria.out	0.139871	884	105	Runella
Echor20_bacteria.out	0.138131	873	1827	Rhodococcus
Echor20_bacteria.out	0.130377	824	68	Lysobacter
Echor20_bacteria.out	0.128637	813	1854	Frankia
Echor20_bacteria.out	0.126897	802	40323	Stenotrophomonas
Echor20_bacteria.out	0.124998	790	347533	Zobellella
Echor20_bacteria.out	0.124207	785	482	Neisseria
Echor20_bacteria.out	0.116454	736	407	Methylobacterium
Echor20_bacteria.out	0.115188	728	1395974	Tardiphaga
Echor20_bacteria.out	0.111232	703	283	Comamonas
Echor20_bacteria.out	0.110599	699	423349	Mucilaginibacter
Echor20_bacteria.out	0.110441	698	872	Desulfovibrio
Echor20_bacteria.out	0.105853	669	590	Salmonella
Echor20_bacteria.out	0.104903	663	1177	Nostoc
Echor20_bacteria.out	1.66801	10542	10239	Viruses
Echor20_bacteria.out	41.936	265040	NA	cannot be assigned to a (non-viral) genus
Echor20_bacteria.out	22.1142	139764	NA	belong to a (non-viral) genus with less than 0.1% of all reads
Echor20_bacteria.out	97.1778	21762653	NA	unclassified
Echor21_bacteria.out	2.44526	21621	1883	Streptomyces
Echor21_bacteria.out	2.19746	19430	469	Acinetobacter
Echor21_bacteria.out	1.60506	14192	286	Pseudomonas
Echor21_bacteria.out	1.50305	13290	1386	Bacillus
Echor21_bacteria.out	1.02284	9044	662	Vibrio
Echor21_bacteria.out	1.01165	8945	570	Klebsiella
Echor21_bacteria.out	0.879211	7774	1350	Enterococcus
Echor21_bacteria.out	0.826734	7310	1279	Staphylococcus
Echor21_bacteria.out	0.79993	7073	1023	Microscilla
Echor21_bacteria.out	0.752995	6658	561	Escherichia
Echor21_bacteria.out	0.749489	6627	573657	Candidatus Hodgkinia
Echor21_bacteria.out	0.699048	6181	1578	Lactobacillus
Echor21_bacteria.out	0.684798	6055	44249	Paenibacillus
Echor21_bacteria.out	0.654489	5787	1485	Clostridium
Echor21_bacteria.out	0.504636	4462	13687	Sphingomonas
Echor21_bacteria.out	0.460754	4074	237	Flavobacterium
Echor21_bacteria.out	0.448879	3969	33882	Microbacterium
Echor21_bacteria.out	0.441302	3902	69965	Macrococcus
Echor21_bacteria.out	0.431123	3812	1301	Streptococcus
Echor21_bacteria.out	0.425129	3759	209	Helicobacter
Echor21_bacteria.out	0.412802	3650	1763	Mycobacterium
Echor21_bacteria.out	0.403528	3568	32008	Burkholderia
Echor21_bacteria.out	0.402849	3562	810	Chlamydia
Echor21_bacteria.out	0.349581	3091	59732	Chryseobacterium
Echor21_bacteria.out	0.339628	3003	965	Oceanospirillum
Echor21_bacteria.out	0.336235	2973	1866885	Mycolicibacterium
Echor21_bacteria.out	0.33386	2952	1156568	Methylovirgula
Echor21_bacteria.out	0.329563	2914	953	Wolbachia
Echor21_bacteria.out	0.31995	2829	194	Campylobacter
Echor21_bacteria.out	0.314747	2783	1839	Nocardioides
Echor21_bacteria.out	0.314521	2781	335927	Thalassobius
Echor21_bacteria.out	0.282854	2501	32	Myxococcus
Echor21_bacteria.out	0.280931	2484	547	Enterobacter
Echor21_bacteria.out	0.264419	2338	374	Bradyrhizobium
Echor21_bacteria.out	0.262044	2317	171	Leptospira
Echor21_bacteria.out	0.254241	2248	816	Bacteroides
Echor21_bacteria.out	0.245532	2171	1817	Nocardia
Echor21_bacteria.out	0.232413	2055	583	Proteus
Echor21_bacteria.out	0.223139	1973	33926	Candidatus Phytoplasma
Echor21_bacteria.out	0.2228	1970	379	Rhizobium
Echor21_bacteria.out	0.220764	1952	84567	Pedobacter
Echor21_bacteria.out	0.218841	1935	2093	Mycoplasma
Echor21_bacteria.out	0.218615	1933	768	Anaplasma
Echor21_bacteria.out	0.217824	1926	246873	Crocinitomix
Echor21_bacteria.out	0.214318	1895	323620	Shinella
Echor21_bacteria.out	0.214091	1893	68287	Mesorhizobium
Echor21_bacteria.out	0.2133	1886	1129	Synechococcus
Echor21_bacteria.out	0.210698	1863	53335	Pantoea
Echor21_bacteria.out	0.207192	1832	334857	Goodfellowiella
Echor21_bacteria.out	0.200294	1771	655184	Candidatus Thioglobus
Echor21_bacteria.out	0.198371	1754	79328	Chitinophaga
Echor21_bacteria.out	0.197919	1750	1873	Micromonospora
Echor21_bacteria.out	0.196901	1741	1988	Actinomadura
Echor21_bacteria.out	0.196448	1737	53246	Pseudoalteromonas
Echor21_bacteria.out	0.19543	1728	1813	Amycolatopsis
Echor21_bacteria.out	0.185365	1639	2745	Halomonas
Echor21_bacteria.out	0.182877	1617	261963	Kangiella
Echor21_bacteria.out	0.181746	1607	838	Prevotella
Echor21_bacteria.out	0.181067	1601	724	Haemophilus
Echor21_bacteria.out	0.170775	1510	347533	Zobellella
Echor21_bacteria.out	0.168514	1490	445	Legionella
Echor21_bacteria.out	0.166025	1468	1298	Deinococcus
Echor21_bacteria.out	0.165573	1464	1663	Arthrobacter
Echor21_bacteria.out	0.157769	1395	40323	Stenotrophomonas
Echor21_bacteria.out	0.15743	1392	1827	Rhodococcus
Echor21_bacteria.out	0.156638	1385	1822464	Paraburkholderia
Echor21_bacteria.out	0.155847	1378	407	Methylobacterium
Echor21_bacteria.out	0.153698	1359	2053	Gordonia
Echor21_bacteria.out	0.148269	1311	105	Runella
Echor21_bacteria.out	0.145781	1289	1716	Corynebacterium
Echor21_bacteria.out	0.138656	1226	68	Lysobacter
Echor21_bacteria.out	0.136281	1205	590	Salmonella
Echor21_bacteria.out	0.135489	1198	2100210	Caedimonas
Echor21_bacteria.out	0.132097	1168	1854	Frankia
Echor21_bacteria.out	0.126442	1118	423349	Mucilaginibacter
Echor21_bacteria.out	0.123275	1090	283	Comamonas
Echor21_bacteria.out	0.120221	1063	872	Desulfovibrio
Echor21_bacteria.out	0.119317	1055	39643	Sorangium
Echor21_bacteria.out	0.117733	1041	265487	Blastopirellula
Echor21_bacteria.out	0.116376	1029	1177	Nostoc
Echor21_bacteria.out	0.113209	1001	1865	Actinoplanes
Echor21_bacteria.out	0.112757	997	2742	Marinobacter
Echor21_bacteria.out	0.110721	979	22	Shewanella
Echor21_bacteria.out	0.105632	934	1847	Pseudonocardia
Echor21_bacteria.out	0.104953	928	482	Neisseria
Echor21_bacteria.out	0.104049	920	2370	Xylella
Echor21_bacteria.out	0.103144	912	89966	Hymenobacter
Echor21_bacteria.out	0.101221	895	1612611	Pararhizobium
Echor21_bacteria.out	0.100882	892	12916	Acidovorax
Echor21_bacteria.out	0.100882	892	690086	Salinarimonas
Echor21_bacteria.out	0.100203	886	182639	Kribbella
Echor21_bacteria.out	2.01504	17817	10239	Viruses
Echor21_bacteria.out	40.7316	360150	NA	cannot be assigned to a (non-viral) genus
Echor21_bacteria.out	24.5619	217177	NA	belong to a (non-viral) genus with less than 0.1% of all reads
Echor21_bacteria.out	97.4268	33477409	NA	unclassified
Echor22_bacteria.out	18.2396	186374	497	Psychrobacter
Echor22_bacteria.out	3.5806	36587	59732	Chryseobacterium
Echor22_bacteria.out	2.07984	21252	469	Acinetobacter
Echor22_bacteria.out	1.99685	20404	1883	Streptomyces
Echor22_bacteria.out	1.38157	14117	286	Pseudomonas
Echor22_bacteria.out	1.20561	12319	1298	Deinococcus
Echor22_bacteria.out	1.19562	12217	1386	Bacillus
Echor22_bacteria.out	1.16665	11921	475	Moraxella
Echor22_bacteria.out	1.08533	11090	1279	Staphylococcus
Echor22_bacteria.out	0.802399	8199	662	Vibrio
Echor22_bacteria.out	0.695726	7109	570	Klebsiella
Echor22_bacteria.out	0.654328	6686	1350	Enterococcus
Echor22_bacteria.out	0.540315	5521	1023	Microscilla
Echor22_bacteria.out	0.531703	5433	561	Escherichia
Echor22_bacteria.out	0.524167	5356	44249	Paenibacillus
Echor22_bacteria.out	0.46398	4741	1485	Clostridium
Echor22_bacteria.out	0.463393	4735	1578	Lactobacillus
Echor22_bacteria.out	0.450768	4606	482	Neisseria
Echor22_bacteria.out	0.433642	4431	237	Flavobacterium
Echor22_bacteria.out	0.354175	3619	33882	Microbacterium
Echor22_bacteria.out	0.34204	3495	1763	Mycobacterium
Echor22_bacteria.out	0.333623	3409	1301	Streptococcus
Echor22_bacteria.out	0.332155	3394	32008	Burkholderia
Echor22_bacteria.out	0.323445	3305	209	Helicobacter
Echor22_bacteria.out	0.303089	3097	810	Chlamydia
Echor22_bacteria.out	0.301523	3081	69965	Macrococcus
Echor22_bacteria.out	0.301034	3076	1716	Corynebacterium
Echor22_bacteria.out	0.284299	2905	13687	Sphingomonas
Echor22_bacteria.out	0.253961	2595	1866885	Mycolicibacterium
Echor22_bacteria.out	0.236541	2417	1854	Frankia
Echor22_bacteria.out	0.230571	2356	1839	Nocardioides
Echor22_bacteria.out	0.222252	2271	194	Campylobacter
Echor22_bacteria.out	0.217849	2226	965	Oceanospirillum
Echor22_bacteria.out	0.212466	2171	547	Enterobacter
Echor22_bacteria.out	0.206692	2112	34084	Riemerella
Echor22_bacteria.out	0.205713	2102	816	Bacteroides
Echor22_bacteria.out	0.19074	1949	32	Myxococcus
Echor22_bacteria.out	0.189468	1936	583	Proteus
Echor22_bacteria.out	0.188391	1925	374	Bradyrhizobium
Echor22_bacteria.out	0.187804	1919	84567	Pedobacter
Echor22_bacteria.out	0.186727	1908	1817	Nocardia
Echor22_bacteria.out	0.179485	1834	171	Leptospira
Echor22_bacteria.out	0.171265	1750	1433995	Cruoricaptor
Echor22_bacteria.out	0.170482	1742	1663	Arthrobacter
Echor22_bacteria.out	0.167546	1712	2745	Halomonas
Echor22_bacteria.out	0.166861	1705	379	Rhizobium
Echor22_bacteria.out	0.164708	1683	53335	Pantoea
Echor22_bacteria.out	0.161772	1653	68287	Mesorhizobium
Echor22_bacteria.out	0.161184	1647	2093	Mycoplasma
Echor22_bacteria.out	0.159716	1632	53246	Pseudoalteromonas
Echor22_bacteria.out	0.154921	1583	79328	Chitinophaga
Echor22_bacteria.out	0.151594	1549	724	Haemophilus
Echor22_bacteria.out	0.150713	1540	573657	Candidatus Hodgkinia
Echor22_bacteria.out	0.149245	1525	1873	Micromonospora
Echor22_bacteria.out	0.14807	1513	1988	Actinomadura
Echor22_bacteria.out	0.147973	1512	838	Prevotella
Echor22_bacteria.out	0.146896	1501	1129	Synechococcus
Echor22_bacteria.out	0.144058	1472	1813	Amycolatopsis
Echor22_bacteria.out	0.139948	1430	445	Legionella
Echor22_bacteria.out	0.128399	1312	590	Salmonella
Echor22_bacteria.out	0.126638	1294	308865	Elizabethkingia
Echor22_bacteria.out	0.125855	1286	1827	Rhodococcus
Echor22_bacteria.out	0.125464	1282	261963	Kangiella
Echor22_bacteria.out	0.122625	1253	334857	Goodfellowiella
Echor22_bacteria.out	0.122528	1252	40323	Stenotrophomonas
Echor22_bacteria.out	0.122528	1252	347533	Zobellella
Echor22_bacteria.out	0.121647	1243	105	Runella
Echor22_bacteria.out	0.117732	1203	1822464	Paraburkholderia
Echor22_bacteria.out	0.114503	1170	2053	Gordonia
Echor22_bacteria.out	0.111958	1144	68	Lysobacter
Echor22_bacteria.out	0.110686	1131	407	Methylobacterium
Echor22_bacteria.out	0.108533	1109	22	Shewanella
Echor22_bacteria.out	0.105205	1075	2742	Marinobacter
Echor22_bacteria.out	1.45418	14859	10239	Viruses
Echor22_bacteria.out	29.701	303488	NA	cannot be assigned to a (non-viral) genus
Echor22_bacteria.out	21.2475	217109	NA	belong to a (non-viral) genus with less than 0.1% of all reads
Echor22_bacteria.out	96.3401	26897438	NA	unclassified
Echor23_bacteria.out	2.56083	20816	1883	Streptomyces
Echor23_bacteria.out	2.3977	19490	469	Acinetobacter
Echor23_bacteria.out	1.50247	12213	286	Pseudomonas
Echor23_bacteria.out	1.40824	11447	1386	Bacillus
Echor23_bacteria.out	1.27217	10341	1279	Staphylococcus
Echor23_bacteria.out	1.03339	8400	573657	Candidatus Hodgkinia
Echor23_bacteria.out	0.958713	7793	570	Klebsiella
Echor23_bacteria.out	0.949363	7717	662	Vibrio
Echor23_bacteria.out	0.848116	6894	1350	Enterococcus
Echor23_bacteria.out	0.768889	6250	561	Escherichia
Echor23_bacteria.out	0.714021	5804	1023	Microscilla
Echor23_bacteria.out	0.704795	5729	1578	Lactobacillus
Echor23_bacteria.out	0.670717	5452	44249	Paenibacillus
Echor23_bacteria.out	0.606992	4934	13687	Sphingomonas
Echor23_bacteria.out	0.586324	4766	1485	Clostridium
Echor23_bacteria.out	0.519646	4224	953	Wolbachia
Echor23_bacteria.out	0.500332	4067	1301	Streptococcus
Echor23_bacteria.out	0.470314	3823	1156568	Methylovirgula
Echor23_bacteria.out	0.469084	3813	810	Chlamydia
Echor23_bacteria.out	0.466377	3791	32008	Burkholderia
Echor23_bacteria.out	0.460103	3740	33882	Microbacterium
Echor23_bacteria.out	0.444972	3617	237	Flavobacterium
Echor23_bacteria.out	0.42578	3461	335927	Thalassobius
Echor23_bacteria.out	0.420859	3421	209	Helicobacter
Echor23_bacteria.out	0.417045	3390	69965	Macrococcus
Echor23_bacteria.out	0.37817	3074	1763	Mycobacterium
Echor23_bacteria.out	0.375587	3053	33926	Candidatus Phytoplasma
Echor23_bacteria.out	0.356642	2899	194	Campylobacter
Echor23_bacteria.out	0.316167	2570	965	Oceanospirillum
Echor23_bacteria.out	0.291932	2373	1866885	Mycolicibacterium
Echor23_bacteria.out	0.290333	2360	323620	Shinella
Echor23_bacteria.out	0.283812	2307	246873	Crocinitomix
Echor23_bacteria.out	0.281598	2289	59732	Chryseobacterium
Echor23_bacteria.out	0.276308	2246	1839	Nocardioides
Echor23_bacteria.out	0.260807	2120	547	Enterobacter
Echor23_bacteria.out	0.256994	2089	768	Anaplasma
Echor23_bacteria.out	0.247029	2008	1817	Nocardia
Echor23_bacteria.out	0.242354	1970	171	Leptospira
Echor23_bacteria.out	0.239647	1948	32	Myxococcus
Echor23_bacteria.out	0.237802	1933	655184	Candidatus Thioglobus
Echor23_bacteria.out	0.23202	1886	816	Bacteroides
Echor23_bacteria.out	0.231036	1878	374	Bradyrhizobium
Echor23_bacteria.out	0.22796	1853	334857	Goodfellowiella
Echor23_bacteria.out	0.22427	1823	68287	Mesorhizobium
Echor23_bacteria.out	0.213075	1732	379	Rhizobium
Echor23_bacteria.out	0.212705	1729	583	Proteus
Echor23_bacteria.out	0.209507	1703	84567	Pedobacter
Echor23_bacteria.out	0.205939	1674	2100210	Caedimonas
Echor23_bacteria.out	0.204709	1664	1129	Synechococcus
Echor23_bacteria.out	0.200649	1631	1873	Micromonospora
Echor23_bacteria.out	0.200526	1630	53246	Pseudoalteromonas
Echor23_bacteria.out	0.194621	1582	2093	Mycoplasma
Echor23_bacteria.out	0.192407	1564	53335	Pantoea
Echor23_bacteria.out	0.18847	1532	1988	Actinomadura
Echor23_bacteria.out	0.183918	1495	1813	Amycolatopsis
Echor23_bacteria.out	0.181458	1475	79328	Chitinophaga
Echor23_bacteria.out	0.175184	1424	2745	Halomonas
Echor23_bacteria.out	0.167433	1361	482	Neisseria
Echor23_bacteria.out	0.16485	1340	838	Prevotella
Echor23_bacteria.out	0.164604	1338	445	Legionella
Echor23_bacteria.out	0.164604	1338	724	Haemophilus
Echor23_bacteria.out	0.163128	1326	1663	Arthrobacter
Echor23_bacteria.out	0.160298	1303	261963	Kangiella
Echor23_bacteria.out	0.15956	1297	1822464	Paraburkholderia
Echor23_bacteria.out	0.153163	1245	1827	Rhodococcus
Echor23_bacteria.out	0.152917	1243	1716	Corynebacterium
Echor23_bacteria.out	0.152671	1241	40323	Stenotrophomonas
Echor23_bacteria.out	0.152425	1239	1854	Frankia
Echor23_bacteria.out	0.143813	1169	2053	Gordonia
Echor23_bacteria.out	0.143075	1163	105	Runella
Echor23_bacteria.out	0.135078	1098	347533	Zobellella
Echor23_bacteria.out	0.131388	1068	590	Salmonella
Echor23_bacteria.out	0.13065	1062	407	Methylobacterium
Echor23_bacteria.out	0.125975	1024	68	Lysobacter
Echor23_bacteria.out	0.12007	976	39643	Sorangium
Echor23_bacteria.out	0.114288	929	423349	Mucilaginibacter
Echor23_bacteria.out	0.114165	928	1865	Actinoplanes
Echor23_bacteria.out	0.112073	911	283	Comamonas
Echor23_bacteria.out	0.11195	910	2742	Marinobacter
Echor23_bacteria.out	0.109367	889	1177	Nostoc
Echor23_bacteria.out	0.107152	871	1847	Pseudonocardia
Echor23_bacteria.out	0.105922	861	89966	Hymenobacter
Echor23_bacteria.out	0.104938	853	872	Desulfovibrio
Echor23_bacteria.out	0.10014	814	12916	Acidovorax
Echor23_bacteria.out	1.91398	15558	10239	Viruses
Echor23_bacteria.out	41.1457	334457	NA	cannot be assigned to a (non-viral) genus
Echor23_bacteria.out	23.8838	194142	NA	belong to a (non-viral) genus with less than 0.1% of all reads
Echor23_bacteria.out	97.3079	29381531	NA	unclassified
Echor24_bacteria.out	2.45415	17132	1883	Streptomyces
Echor24_bacteria.out	2.22036	15500	469	Acinetobacter
Echor24_bacteria.out	1.54996	10820	286	Pseudomonas
Echor24_bacteria.out	1.461	10199	1386	Bacillus
Echor24_bacteria.out	1.06921	7464	1279	Staphylococcus
Echor24_bacteria.out	1.03111	7198	573657	Candidatus Hodgkinia
Echor24_bacteria.out	0.987131	6891	570	Klebsiella
Echor24_bacteria.out	0.95361	6657	662	Vibrio
Echor24_bacteria.out	0.858636	5994	1350	Enterococcus
Echor24_bacteria.out	0.772113	5390	1023	Microscilla
Echor24_bacteria.out	0.716103	4999	561	Escherichia
Echor24_bacteria.out	0.673558	4702	1578	Lactobacillus
Echor24_bacteria.out	0.655365	4575	44249	Paenibacillus
Echor24_bacteria.out	0.621845	4341	1485	Clostridium
Echor24_bacteria.out	0.480028	3351	1156568	Methylovirgula
Echor24_bacteria.out	0.476447	3326	953	Wolbachia
Echor24_bacteria.out	0.470717	3286	13687	Sphingomonas
Echor24_bacteria.out	0.45453	3173	810	Chlamydia
Echor24_bacteria.out	0.452524	3159	33882	Microbacterium
Echor24_bacteria.out	0.432326	3018	237	Flavobacterium
Echor24_bacteria.out	0.432326	3018	335927	Thalassobius
Echor24_bacteria.out	0.430177	3003	32008	Burkholderia
Echor24_bacteria.out	0.429175	2996	1301	Streptococcus
Echor24_bacteria.out	0.423874	2959	69965	Macrococcus
Echor24_bacteria.out	0.417858	2917	209	Helicobacter
Echor24_bacteria.out	0.361991	2527	1763	Mycobacterium
Echor24_bacteria.out	0.350817	2449	965	Oceanospirillum
Echor24_bacteria.out	0.341936	2387	194	Campylobacter
Echor24_bacteria.out	0.330763	2309	33926	Candidatus Phytoplasma
Echor24_bacteria.out	0.316438	2209	1839	Nocardioides
Echor24_bacteria.out	0.307986	2150	323620	Shinella
Echor24_bacteria.out	0.302542	2112	1866885	Mycolicibacterium
Echor24_bacteria.out	0.282917	1975	59732	Chryseobacterium
Echor24_bacteria.out	0.275039	1920	547	Enterobacter
Echor24_bacteria.out	0.263006	1836	32	Myxococcus
Echor24_bacteria.out	0.2557	1785	816	Bacteroides
Echor24_bacteria.out	0.240802	1681	171	Leptospira
Echor24_bacteria.out	0.239226	1670	374	Bradyrhizobium
Echor24_bacteria.out	0.231204	1614	1817	Nocardia
Echor24_bacteria.out	0.223899	1563	768	Anaplasma
Echor24_bacteria.out	0.222896	1556	334857	Goodfellowiella
Echor24_bacteria.out	0.217596	1519	68287	Mesorhizobium
Echor24_bacteria.out	0.216306	1510	246873	Crocinitomix
Echor24_bacteria.out	0.213155	1488	379	Rhizobium
Echor24_bacteria.out	0.211866	1479	53335	Pantoea
Echor24_bacteria.out	0.211866	1479	84567	Pedobacter
Echor24_bacteria.out	0.211149	1474	2100210	Caedimonas
Echor24_bacteria.out	0.207855	1451	1873	Micromonospora
Echor24_bacteria.out	0.206565	1442	53246	Pseudoalteromonas
Echor24_bacteria.out	0.206136	1439	1129	Synechococcus
Echor24_bacteria.out	0.203271	1419	655184	Candidatus Thioglobus
Echor24_bacteria.out	0.202125	1411	583	Proteus
Echor24_bacteria.out	0.198687	1387	2093	Mycoplasma
Echor24_bacteria.out	0.197397	1378	79328	Chitinophaga
Echor24_bacteria.out	0.193816	1353	1813	Amycolatopsis
Echor24_bacteria.out	0.188659	1317	1988	Actinomadura
Echor24_bacteria.out	0.179635	1254	2745	Halomonas
Echor24_bacteria.out	0.174191	1216	261963	Kangiella
Echor24_bacteria.out	0.171326	1196	445	Legionella
Echor24_bacteria.out	0.168461	1176	724	Haemophilus
Echor24_bacteria.out	0.160296	1119	1822464	Paraburkholderia
Echor24_bacteria.out	0.159293	1112	838	Prevotella
Echor24_bacteria.out	0.156285	1091	1663	Arthrobacter
Echor24_bacteria.out	0.156142	1090	2053	Gordonia
Echor24_bacteria.out	0.15256	1065	1827	Rhodococcus
Echor24_bacteria.out	0.145255	1014	40323	Stenotrophomonas
Echor24_bacteria.out	0.144825	1011	347533	Zobellella
Echor24_bacteria.out	0.140671	982	1716	Corynebacterium
Echor24_bacteria.out	0.140384	980	105	Runella
Echor24_bacteria.out	0.139238	972	407	Methylobacterium
Echor24_bacteria.out	0.126776	885	68	Lysobacter
Echor24_bacteria.out	0.125773	878	590	Salmonella
Echor24_bacteria.out	0.119327	833	1854	Frankia
Echor24_bacteria.out	0.118897	830	283	Comamonas
Echor24_bacteria.out	0.116032	810	1177	Nostoc
Echor24_bacteria.out	0.115889	809	39643	Sorangium
Echor24_bacteria.out	0.115745	808	872	Desulfovibrio
Echor24_bacteria.out	0.114886	802	423349	Mucilaginibacter
Echor24_bacteria.out	0.11331	791	2742	Marinobacter
Echor24_bacteria.out	0.112021	782	1865	Actinoplanes
Echor24_bacteria.out	0.110159	769	89966	Hymenobacter
Echor24_bacteria.out	0.103856	725	265487	Blastopirellula
Echor24_bacteria.out	0.103569	723	1847	Pseudonocardia
Echor24_bacteria.out	0.101993	712	22	Shewanella
Echor24_bacteria.out	0.101564	709	34072	Variovorax
Echor24_bacteria.out	0.100561	702	262	Francisella
Echor24_bacteria.out	1.95378	13639	10239	Viruses
Echor24_bacteria.out	41.5484	290043	NA	cannot be assigned to a (non-viral) genus
Echor24_bacteria.out	23.9511	167199	NA	belong to a (non-viral) genus with less than 0.1% of all reads
Echor24_bacteria.out	97.3527	25671431	NA	unclassified
Echor25_bacteria.out	2.28692	18205	1883	Streptomyces
Echor25_bacteria.out	2.1613	17205	469	Acinetobacter
Echor25_bacteria.out	1.59274	12679	286	Pseudomonas
Echor25_bacteria.out	1.52428	12134	1386	Bacillus
Echor25_bacteria.out	1.05056	8363	662	Vibrio
Echor25_bacteria.out	0.970293	7724	570	Klebsiella
Echor25_bacteria.out	0.893413	7112	1350	Enterococcus
Echor25_bacteria.out	0.85535	6809	1279	Staphylococcus
Echor25_bacteria.out	0.824573	6564	1023	Microscilla
Echor25_bacteria.out	0.785003	6249	573657	Candidatus Hodgkinia
Echor25_bacteria.out	0.747442	5950	1578	Lactobacillus
Echor25_bacteria.out	0.721313	5742	44249	Paenibacillus
Echor25_bacteria.out	0.694682	5530	561	Escherichia
Echor25_bacteria.out	0.667296	5312	1485	Clostridium
Echor25_bacteria.out	0.450098	3583	237	Flavobacterium
Echor25_bacteria.out	0.447209	3560	209	Helicobacter
Echor25_bacteria.out	0.445827	3549	69965	Macrococcus
Echor25_bacteria.out	0.437034	3479	1301	Streptococcus
Echor25_bacteria.out	0.426984	3399	33882	Microbacterium
Echor25_bacteria.out	0.416809	3318	810	Chlamydia
Echor25_bacteria.out	0.385781	3071	1763	Mycobacterium
Echor25_bacteria.out	0.376234	2995	953	Wolbachia
Echor25_bacteria.out	0.368822	2936	32008	Burkholderia
Echor25_bacteria.out	0.367189	2923	965	Oceanospirillum
Echor25_bacteria.out	0.330382	2630	335927	Thalassobius
Echor25_bacteria.out	0.330131	2628	1156568	Methylovirgula
Echor25_bacteria.out	0.310157	2469	1866885	Mycolicibacterium
Echor25_bacteria.out	0.302369	2407	13687	Sphingomonas
Echor25_bacteria.out	0.301615	2401	194	Campylobacter
Echor25_bacteria.out	0.299856	2387	59732	Chryseobacterium
Echor25_bacteria.out	0.299103	2381	1839	Nocardioides
Echor25_bacteria.out	0.297721	2370	547	Enterobacter
Echor25_bacteria.out	0.277873	2212	816	Bacteroides
Echor25_bacteria.out	0.262924	2093	171	Leptospira
Echor25_bacteria.out	0.257899	2053	32	Myxococcus
Echor25_bacteria.out	0.255135	2031	374	Bradyrhizobium
Echor25_bacteria.out	0.228881	1822	1817	Nocardia
Echor25_bacteria.out	0.228755	1821	84567	Pedobacter
Echor25_bacteria.out	0.226117	1800	53335	Pantoea
Echor25_bacteria.out	0.225238	1793	2093	Mycoplasma
Echor25_bacteria.out	0.224861	1790	68287	Mesorhizobium
Echor25_bacteria.out	0.224484	1787	379	Rhizobium
Echor25_bacteria.out	0.222097	1768	33926	Candidatus Phytoplasma
Echor25_bacteria.out	0.2177	1733	1129	Synechococcus
Echor25_bacteria.out	0.217575	1732	583	Proteus
Echor25_bacteria.out	0.215314	1714	334857	Goodfellowiella
Echor25_bacteria.out	0.214057	1704	53246	Pseudoalteromonas
Echor25_bacteria.out	0.209535	1668	323620	Shinella
Echor25_bacteria.out	0.203003	1616	768	Anaplasma
Echor25_bacteria.out	0.195842	1559	1873	Micromonospora
Echor25_bacteria.out	0.19333	1539	79328	Chitinophaga
Echor25_bacteria.out	0.187928	1496	1813	Amycolatopsis
Echor25_bacteria.out	0.184913	1472	838	Prevotella
Echor25_bacteria.out	0.182904	1456	2745	Halomonas
Echor25_bacteria.out	0.182527	1453	246873	Crocinitomix
Echor25_bacteria.out	0.180642	1438	445	Legionella
Echor25_bacteria.out	0.180391	1436	655184	Candidatus Thioglobus
Echor25_bacteria.out	0.179009	1425	2053	Gordonia
Echor25_bacteria.out	0.178884	1424	1988	Actinomadura
Echor25_bacteria.out	0.165442	1317	724	Haemophilus
Echor25_bacteria.out	0.163809	1304	347533	Zobellella
Echor25_bacteria.out	0.163181	1299	261963	Kangiella
Echor25_bacteria.out	0.16293	1297	105	Runella
Echor25_bacteria.out	0.162553	1294	1663	Arthrobacter
Echor25_bacteria.out	0.162176	1291	2100210	Caedimonas
Echor25_bacteria.out	0.160292	1276	1822464	Paraburkholderia
Echor25_bacteria.out	0.156774	1248	1716	Corynebacterium
Echor25_bacteria.out	0.156146	1243	40323	Stenotrophomonas
Echor25_bacteria.out	0.154011	1226	1827	Rhodococcus
Echor25_bacteria.out	0.144212	1148	407	Methylobacterium
Echor25_bacteria.out	0.139313	1109	68	Lysobacter
Echor25_bacteria.out	0.133535	1063	590	Salmonella
Echor25_bacteria.out	0.131399	1046	423349	Mucilaginibacter
Echor25_bacteria.out	0.130269	1037	872	Desulfovibrio
Echor25_bacteria.out	0.125621	1000	1854	Frankia
Echor25_bacteria.out	0.122354	974	89966	Hymenobacter
Echor25_bacteria.out	0.113812	906	482	Neisseria
Echor25_bacteria.out	0.113812	906	1177	Nostoc
Echor25_bacteria.out	0.111677	889	283	Comamonas
Echor25_bacteria.out	0.111049	884	2742	Marinobacter
Echor25_bacteria.out	0.107531	856	83461	Corallococcus
Echor25_bacteria.out	0.103134	821	39643	Sorangium
Echor25_bacteria.out	0.103134	821	265487	Blastopirellula
Echor25_bacteria.out	0.102506	816	1612611	Pararhizobium
Echor25_bacteria.out	0.100496	800	1865	Actinoplanes
Echor25_bacteria.out	2.02262	16101	10239	Viruses
Echor25_bacteria.out	41.2157	328097	NA	cannot be assigned to a (non-viral) genus
Echor25_bacteria.out	25.1342	200080	NA	belong to a (non-viral) genus with less than 0.1% of all reads
Echor25_bacteria.out	97.544	31616232	NA	unclassified
Echor26_bacteria.out	2.49086	6312	1883	Streptomyces
Echor26_bacteria.out	2.12505	5385	1279	Staphylococcus
Echor26_bacteria.out	2.10532	5335	469	Acinetobacter
Echor26_bacteria.out	1.84723	4681	573657	Candidatus Hodgkinia
Echor26_bacteria.out	1.31804	3340	286	Pseudomonas
Echor26_bacteria.out	1.29081	3271	1386	Bacillus
Echor26_bacteria.out	1.02129	2588	1156568	Methylovirgula
Echor26_bacteria.out	1.013	2567	13687	Sphingomonas
Echor26_bacteria.out	0.990505	2510	953	Wolbachia
Echor26_bacteria.out	0.8441	2139	662	Vibrio
Echor26_bacteria.out	0.804638	2039	570	Klebsiella
Echor26_bacteria.out	0.788458	1998	1350	Enterococcus
Echor26_bacteria.out	0.743471	1884	335927	Thalassobius
Echor26_bacteria.out	0.659811	1672	561	Escherichia
Echor26_bacteria.out	0.653497	1656	1023	Microscilla
Echor26_bacteria.out	0.640474	1623	323620	Shinella
Echor26_bacteria.out	0.588778	1492	1578	Lactobacillus
Echor26_bacteria.out	0.575756	1459	44249	Paenibacillus
Echor26_bacteria.out	0.549316	1392	33926	Candidatus Phytoplasma
Echor26_bacteria.out	0.538267	1364	1485	Clostridium
Echor26_bacteria.out	0.468813	1188	2100210	Caedimonas
Echor26_bacteria.out	0.459342	1164	810	Chlamydia
Echor26_bacteria.out	0.438427	1111	194	Campylobacter
Echor26_bacteria.out	0.399359	1012	32008	Burkholderia
Echor26_bacteria.out	0.380023	963	237	Flavobacterium
Echor26_bacteria.out	0.380023	963	1301	Streptococcus
Echor26_bacteria.out	0.375287	951	482	Neisseria
Echor26_bacteria.out	0.366605	929	33882	Microbacterium
Echor26_bacteria.out	0.357134	905	1763	Mycobacterium
Echor26_bacteria.out	0.35674	904	69965	Macrococcus
Echor26_bacteria.out	0.326748	828	209	Helicobacter
Echor26_bacteria.out	0.300309	761	965	Oceanospirillum
Echor26_bacteria.out	0.264398	670	59732	Chryseobacterium
Echor26_bacteria.out	0.25177	638	1839	Nocardioides
Echor26_bacteria.out	0.240326	609	547	Enterobacter
Echor26_bacteria.out	0.237958	603	1866885	Mycolicibacterium
Echor26_bacteria.out	0.224146	568	816	Bacteroides
Echor26_bacteria.out	0.219411	556	171	Leptospira
Echor26_bacteria.out	0.210334	533	32	Myxococcus
Echor26_bacteria.out	0.205599	521	68287	Mesorhizobium
Echor26_bacteria.out	0.20481	519	1854	Frankia
Echor26_bacteria.out	0.203231	515	53335	Pantoea
Echor26_bacteria.out	0.200469	508	374	Bradyrhizobium
Echor26_bacteria.out	0.19968	506	1817	Nocardia
Echor26_bacteria.out	0.192971	489	2093	Mycoplasma
Echor26_bacteria.out	0.183105	464	1129	Synechococcus
Echor26_bacteria.out	0.181527	460	379	Rhizobium
Echor26_bacteria.out	0.181527	460	84567	Pedobacter
Echor26_bacteria.out	0.172451	437	334857	Goodfellowiella
Echor26_bacteria.out	0.170477	432	79328	Chitinophaga
Echor26_bacteria.out	0.164953	418	1813	Amycolatopsis
Echor26_bacteria.out	0.163374	414	246873	Crocinitomix
Echor26_bacteria.out	0.16298	413	53246	Pseudoalteromonas
Echor26_bacteria.out	0.162585	412	1873	Micromonospora
Echor26_bacteria.out	0.16219	411	768	Anaplasma
Echor26_bacteria.out	0.161401	409	2745	Halomonas
Echor26_bacteria.out	0.154692	392	838	Prevotella
Echor26_bacteria.out	0.148773	377	1716	Corynebacterium
Echor26_bacteria.out	0.147984	375	445	Legionella
Echor26_bacteria.out	0.1468	372	82986	Tatumella
Echor26_bacteria.out	0.146011	370	583	Proteus
Echor26_bacteria.out	0.143248	363	261963	Kangiella
Echor26_bacteria.out	0.143248	363	1822464	Paraburkholderia
Echor26_bacteria.out	0.139697	354	655184	Candidatus Thioglobus
Echor26_bacteria.out	0.137329	348	1988	Actinomadura
Echor26_bacteria.out	0.129042	327	1395974	Tardiphaga
Echor26_bacteria.out	0.128647	326	1663	Arthrobacter
Echor26_bacteria.out	0.125885	319	105	Runella
Echor26_bacteria.out	0.125885	319	590	Salmonella
Echor26_bacteria.out	0.123912	314	724	Haemophilus
Echor26_bacteria.out	0.120755	306	1827	Rhodococcus
Echor26_bacteria.out	0.120755	306	2053	Gordonia
Echor26_bacteria.out	0.113257	287	68	Lysobacter
Echor26_bacteria.out	0.112073	284	347533	Zobellella
Echor26_bacteria.out	0.1101	279	40323	Stenotrophomonas
Echor26_bacteria.out	0.104575	265	407	Methylobacterium
Echor26_bacteria.out	0.102208	259	2742	Marinobacter
Echor26_bacteria.out	0.101418	257	283	Comamonas
Echor26_bacteria.out	1.66729	4225	10239	Viruses
Echor26_bacteria.out	43.2144	109508	NA	cannot be assigned to a (non-viral) genus
Echor26_bacteria.out	21.3728	54160	NA	belong to a (non-viral) genus with less than 0.1% of all reads
Echor26_bacteria.out	97.2442	8941857	NA	unclassified
Echor27_bacteria.out	2.475	17407	1883	Streptomyces
Echor27_bacteria.out	2.21097	15550	469	Acinetobacter
Echor27_bacteria.out	1.71901	12090	286	Pseudomonas
Echor27_bacteria.out	1.43549	10096	1386	Bacillus
Echor27_bacteria.out	1.21482	8544	1279	Staphylococcus
Echor27_bacteria.out	1.07534	7563	573657	Candidatus Hodgkinia
Echor27_bacteria.out	0.969555	6819	662	Vibrio
Echor27_bacteria.out	0.940692	6616	570	Klebsiella
Echor27_bacteria.out	0.85723	6029	1350	Enterococcus
Echor27_bacteria.out	0.743767	5231	1023	Microscilla
Echor27_bacteria.out	0.724714	5097	561	Escherichia
Echor27_bacteria.out	0.688741	4844	44249	Paenibacillus
Echor27_bacteria.out	0.642816	4521	1578	Lactobacillus
Echor27_bacteria.out	0.58452	4111	1485	Clostridium
Echor27_bacteria.out	0.5194	3653	953	Wolbachia
Echor27_bacteria.out	0.480015	3376	13687	Sphingomonas
Echor27_bacteria.out	0.468071	3292	237	Flavobacterium
Echor27_bacteria.out	0.446886	3143	1301	Streptococcus
Echor27_bacteria.out	0.435795	3065	810	Chlamydia
Echor27_bacteria.out	0.429397	3020	33882	Microbacterium
Echor27_bacteria.out	0.427975	3010	1156568	Methylovirgula
Echor27_bacteria.out	0.416174	2927	335927	Thalassobius
Echor27_bacteria.out	0.415747	2924	1763	Mycobacterium
Echor27_bacteria.out	0.403093	2835	69965	Macrococcus
Echor27_bacteria.out	0.402382	2830	209	Helicobacter
Echor27_bacteria.out	0.400676	2818	32008	Burkholderia
Echor27_bacteria.out	0.370106	2603	33926	Candidatus Phytoplasma
Echor27_bacteria.out	0.367547	2585	194	Campylobacter
Echor27_bacteria.out	0.348067	2448	965	Oceanospirillum
Echor27_bacteria.out	0.288777	2031	1839	Nocardioides
Echor27_bacteria.out	0.283942	1997	59732	Chryseobacterium
Echor27_bacteria.out	0.28181	1982	1866885	Mycolicibacterium
Echor27_bacteria.out	0.275269	1936	547	Enterobacter
Echor27_bacteria.out	0.256785	1806	323620	Shinella
Echor27_bacteria.out	0.252377	1775	816	Bacteroides
Echor27_bacteria.out	0.250102	1759	84567	Pedobacter
Echor27_bacteria.out	0.249818	1757	482	Neisseria
Echor27_bacteria.out	0.244984	1723	374	Bradyrhizobium
Echor27_bacteria.out	0.244557	1720	171	Leptospira
Echor27_bacteria.out	0.238728	1679	32	Myxococcus
Echor27_bacteria.out	0.234604	1650	1817	Nocardia
Echor27_bacteria.out	0.22849	1607	68287	Mesorhizobium
Echor27_bacteria.out	0.215125	1513	379	Rhizobium
Echor27_bacteria.out	0.210433	1480	53335	Pantoea
Echor27_bacteria.out	0.206167	1450	2100210	Caedimonas
Echor27_bacteria.out	0.200764	1412	768	Anaplasma
Echor27_bacteria.out	0.198916	1399	1873	Micromonospora
Echor27_bacteria.out	0.198063	1393	583	Proteus
Echor27_bacteria.out	0.196357	1381	334857	Goodfellowiella
Echor27_bacteria.out	0.195504	1375	53246	Pseudoalteromonas
Echor27_bacteria.out	0.191522	1347	79328	Chitinophaga
Echor27_bacteria.out	0.190954	1343	2093	Mycoplasma
Echor27_bacteria.out	0.189816	1335	1129	Synechococcus
Echor27_bacteria.out	0.187115	1316	1813	Amycolatopsis
Echor27_bacteria.out	0.184271	1296	246873	Crocinitomix
Echor27_bacteria.out	0.176166	1239	2745	Halomonas
Echor27_bacteria.out	0.175882	1237	838	Prevotella
Echor27_bacteria.out	0.174602	1228	655184	Candidatus Thioglobus
Echor27_bacteria.out	0.170053	1196	724	Haemophilus
Echor27_bacteria.out	0.168773	1187	261963	Kangiella
Echor27_bacteria.out	0.168489	1185	1988	Actinomadura
Echor27_bacteria.out	0.167351	1177	1663	Arthrobacter
Echor27_bacteria.out	0.167067	1175	1854	Frankia
Echor27_bacteria.out	0.166356	1170	445	Legionella
Echor27_bacteria.out	0.159389	1121	2053	Gordonia
Echor27_bacteria.out	0.153701	1081	1827	Rhodococcus
Echor27_bacteria.out	0.15299	1076	105	Runella
Echor27_bacteria.out	0.151142	1063	40323	Stenotrophomonas
Echor27_bacteria.out	0.150147	1056	1822464	Paraburkholderia
Echor27_bacteria.out	0.147019	1034	68	Lysobacter
Echor27_bacteria.out	0.141047	992	347533	Zobellella
Echor27_bacteria.out	0.134222	944	407	Methylobacterium
Echor27_bacteria.out	0.132089	929	590	Salmonella
Echor27_bacteria.out	0.131805	927	1716	Corynebacterium
Echor27_bacteria.out	0.119008	837	29580	Janthinobacterium
Echor27_bacteria.out	0.115738	814	423349	Mucilaginibacter
Echor27_bacteria.out	0.115169	810	89966	Hymenobacter
Echor27_bacteria.out	0.113037	795	2742	Marinobacter
Echor27_bacteria.out	0.111046	781	872	Desulfovibrio
Echor27_bacteria.out	0.110762	779	39643	Sorangium
Echor27_bacteria.out	0.107776	758	283	Comamonas
Echor27_bacteria.out	0.107776	758	1177	Nostoc
Echor27_bacteria.out	0.10678	751	34072	Variovorax
Echor27_bacteria.out	0.106496	749	1865	Actinoplanes
Echor27_bacteria.out	0.10607	746	22	Shewanella
Echor27_bacteria.out	1.94096	13651	10239	Viruses
Echor27_bacteria.out	41.4802	291735	NA	cannot be assigned to a (non-viral) genus
Echor27_bacteria.out	23.8617	167822	NA	belong to a (non-viral) genus with less than 0.1% of all reads
Echor27_bacteria.out	97.3721	26059809	NA	unclassified
Echor28_bacteria.out	2.38852	15803	1883	Streptomyces
Echor28_bacteria.out	2.15183	14237	469	Acinetobacter
Echor28_bacteria.out	1.67301	11069	286	Pseudomonas
Echor28_bacteria.out	1.51597	10030	1386	Bacillus
Echor28_bacteria.out	1.03216	6829	662	Vibrio
Echor28_bacteria.out	0.967017	6398	570	Klebsiella
Echor28_bacteria.out	0.884946	5855	1279	Staphylococcus
Echor28_bacteria.out	0.871495	5766	1350	Enterococcus
Echor28_bacteria.out	0.782471	5177	1023	Microscilla
Echor28_bacteria.out	0.760404	5031	573657	Candidatus Hodgkinia
Echor28_bacteria.out	0.728815	4822	44249	Paenibacillus
Echor28_bacteria.out	0.725339	4799	561	Escherichia
Echor28_bacteria.out	0.666241	4408	1578	Lactobacillus
Echor28_bacteria.out	0.638431	4224	1485	Clostridium
Echor28_bacteria.out	0.452978	2997	237	Flavobacterium
Echor28_bacteria.out	0.451769	2989	33882	Microbacterium
Echor28_bacteria.out	0.451315	2986	13687	Sphingomonas
Echor28_bacteria.out	0.435747	2883	69965	Macrococcus
Echor28_bacteria.out	0.435143	2879	209	Helicobacter
Echor28_bacteria.out	0.425621	2816	810	Chlamydia
Echor28_bacteria.out	0.415947	2752	1301	Streptococcus
Echor28_bacteria.out	0.404612	2677	1763	Mycobacterium
Echor28_bacteria.out	0.404158	2674	32008	Burkholderia
Echor28_bacteria.out	0.375894	2487	953	Wolbachia
Echor28_bacteria.out	0.373325	2470	965	Oceanospirillum
Echor28_bacteria.out	0.328889	2176	194	Campylobacter
Echor28_bacteria.out	0.320576	2121	1156568	Methylovirgula
Echor28_bacteria.out	0.3106	2055	1866885	Mycolicibacterium
Echor28_bacteria.out	0.305461	2021	335927	Thalassobius
Echor28_bacteria.out	0.30259	2002	1839	Nocardioides
Echor28_bacteria.out	0.299265	1980	59732	Chryseobacterium
Echor28_bacteria.out	0.296242	1960	547	Enterobacter
Echor28_bacteria.out	0.270396	1789	816	Bacteroides
Echor28_bacteria.out	0.26964	1784	171	Leptospira
Echor28_bacteria.out	0.255433	1690	32	Myxococcus
Echor28_bacteria.out	0.254828	1686	374	Bradyrhizobium
Echor28_bacteria.out	0.250294	1656	33926	Candidatus Phytoplasma
Echor28_bacteria.out	0.24183	1600	1817	Nocardia
Echor28_bacteria.out	0.235482	1558	379	Rhizobium
Echor28_bacteria.out	0.227169	1503	68287	Mesorhizobium
Echor28_bacteria.out	0.225053	1489	84567	Pedobacter
Echor28_bacteria.out	0.221728	1467	583	Proteus
Echor28_bacteria.out	0.214926	1422	53335	Pantoea
Echor28_bacteria.out	0.210694	1394	2093	Mycoplasma
Echor28_bacteria.out	0.209939	1389	1873	Micromonospora
Echor28_bacteria.out	0.207067	1370	53246	Pseudoalteromonas
Echor28_bacteria.out	0.20616	1364	1129	Synechococcus
Echor28_bacteria.out	0.202381	1339	1813	Amycolatopsis
Echor28_bacteria.out	0.197696	1308	79328	Chitinophaga
Echor28_bacteria.out	0.196033	1297	1988	Actinomadura
Echor28_bacteria.out	0.194824	1289	768	Anaplasma
Echor28_bacteria.out	0.191348	1266	334857	Goodfellowiella
Echor28_bacteria.out	0.186511	1234	838	Prevotella
Echor28_bacteria.out	0.186511	1234	655184	Candidatus Thioglobus
Echor28_bacteria.out	0.185	1224	445	Legionella
Echor28_bacteria.out	0.179408	1187	2745	Halomonas
Echor28_bacteria.out	0.175327	1160	246873	Crocinitomix
Echor28_bacteria.out	0.174571	1155	323620	Shinella
Echor28_bacteria.out	0.170944	1131	261963	Kangiella
Echor28_bacteria.out	0.170792	1130	724	Haemophilus
Echor28_bacteria.out	0.170339	1127	1663	Arthrobacter
Echor28_bacteria.out	0.166107	1099	40323	Stenotrophomonas
Echor28_bacteria.out	0.162177	1073	1822464	Paraburkholderia
Echor28_bacteria.out	0.161724	1070	482	Neisseria
Echor28_bacteria.out	0.158852	1051	347533	Zobellella
Echor28_bacteria.out	0.158096	1046	105	Runella
Echor28_bacteria.out	0.152957	1012	2100210	Caedimonas
Echor28_bacteria.out	0.151597	1003	1827	Rhodococcus
Echor28_bacteria.out	0.150388	995	1716	Corynebacterium
Echor28_bacteria.out	0.149179	987	2053	Gordonia
Echor28_bacteria.out	0.148272	981	1854	Frankia
Echor28_bacteria.out	0.141471	936	407	Methylobacterium
Echor28_bacteria.out	0.140564	930	68	Lysobacter
Echor28_bacteria.out	0.133309	882	590	Salmonella
Echor28_bacteria.out	0.121973	807	2742	Marinobacter
Echor28_bacteria.out	0.120159	795	423349	Mucilaginibacter
Echor28_bacteria.out	0.119857	793	283	Comamonas
Echor28_bacteria.out	0.119252	789	1177	Nostoc
Echor28_bacteria.out	0.118346	783	1865	Actinoplanes
Echor28_bacteria.out	0.117892	780	39643	Sorangium
Echor28_bacteria.out	0.112149	742	872	Desulfovibrio
Echor28_bacteria.out	0.110939	734	22	Shewanella
Echor28_bacteria.out	0.105649	699	89966	Hymenobacter
Echor28_bacteria.out	0.105498	698	690086	Salinarimonas
Echor28_bacteria.out	0.105196	696	265487	Blastopirellula
Echor28_bacteria.out	0.104894	694	12916	Acidovorax
Echor28_bacteria.out	0.101569	672	34072	Variovorax
Echor28_bacteria.out	0.100359	664	1612611	Pararhizobium
Echor28_bacteria.out	2.06961	13693	10239	Viruses
Echor28_bacteria.out	40.9311	270809	NA	cannot be assigned to a (non-viral) genus
Echor28_bacteria.out	24.8018	164094	NA	belong to a (non-viral) genus with less than 0.1% of all reads
Echor28_bacteria.out	97.477	25561733	NA	unclassified
Echor29_bacteria.out	2.47798	16758	1883	Streptomyces
Echor29_bacteria.out	2.196	14851	469	Acinetobacter
Echor29_bacteria.out	1.49998	10144	286	Pseudomonas
Echor29_bacteria.out	1.37296	9285	1386	Bacillus
Echor29_bacteria.out	1.20173	8127	573657	Candidatus Hodgkinia
Echor29_bacteria.out	1.17644	7956	1279	Staphylococcus
Echor29_bacteria.out	0.951682	6436	662	Vibrio
Echor29_bacteria.out	0.898006	6073	570	Klebsiella
Echor29_bacteria.out	0.826881	5592	1350	Enterococcus
Echor29_bacteria.out	0.725887	4909	13687	Sphingomonas
Echor29_bacteria.out	0.715832	4841	1023	Microscilla
Echor29_bacteria.out	0.699714	4732	561	Escherichia
Echor29_bacteria.out	0.67088	4537	953	Wolbachia
Echor29_bacteria.out	0.639384	4324	44249	Paenibacillus
Echor29_bacteria.out	0.62371	4218	1578	Lactobacillus
Echor29_bacteria.out	0.595467	4027	1485	Clostridium
Echor29_bacteria.out	0.542234	3667	1156568	Methylovirgula
Echor29_bacteria.out	0.483383	3269	335927	Thalassobius
Echor29_bacteria.out	0.445824	3015	1301	Streptococcus
Echor29_bacteria.out	0.430889	2914	810	Chlamydia
Echor29_bacteria.out	0.43015	2909	33926	Candidatus Phytoplasma
Echor29_bacteria.out	0.425418	2877	33882	Microbacterium
Echor29_bacteria.out	0.412849	2792	69965	Macrococcus
Echor29_bacteria.out	0.400428	2708	237	Flavobacterium
Echor29_bacteria.out	0.399985	2705	209	Helicobacter
Echor29_bacteria.out	0.378692	2561	32008	Burkholderia
Echor29_bacteria.out	0.374551	2533	1763	Mycobacterium
Echor29_bacteria.out	0.358138	2422	194	Campylobacter
Echor29_bacteria.out	0.338767	2291	323620	Shinella
Echor29_bacteria.out	0.316735	2142	965	Oceanospirillum
Echor29_bacteria.out	0.296772	2007	1839	Nocardioides
Echor29_bacteria.out	0.290266	1963	1866885	Mycolicibacterium
Echor29_bacteria.out	0.274001	1853	547	Enterobacter
Echor29_bacteria.out	0.261432	1768	59732	Chryseobacterium
Echor29_bacteria.out	0.245906	1663	816	Bacteroides
Echor29_bacteria.out	0.243835	1649	171	Leptospira
Echor29_bacteria.out	0.243687	1648	32	Myxococcus
Echor29_bacteria.out	0.241913	1636	246873	Crocinitomix
Echor29_bacteria.out	0.241174	1631	374	Bradyrhizobium
Echor29_bacteria.out	0.239104	1617	2100210	Caedimonas
Echor29_bacteria.out	0.221803	1500	334857	Goodfellowiella
Echor29_bacteria.out	0.221507	1498	1873	Micromonospora
Echor29_bacteria.out	0.219585	1485	768	Anaplasma
Echor29_bacteria.out	0.216184	1462	1817	Nocardia
Echor29_bacteria.out	0.20746	1403	379	Rhizobium
Echor29_bacteria.out	0.203467	1376	583	Proteus
Echor29_bacteria.out	0.199771	1351	68287	Mesorhizobium
Echor29_bacteria.out	0.19356	1309	79328	Chitinophaga
Echor29_bacteria.out	0.191342	1294	2093	Mycoplasma
Echor29_bacteria.out	0.190898	1291	1129	Synechococcus
Echor29_bacteria.out	0.190898	1291	53335	Pantoea
Echor29_bacteria.out	0.190159	1286	655184	Candidatus Thioglobus
Echor29_bacteria.out	0.189124	1279	84567	Pedobacter
Echor29_bacteria.out	0.187793	1270	53246	Pseudoalteromonas
Echor29_bacteria.out	0.185427	1254	1813	Amycolatopsis
Echor29_bacteria.out	0.179513	1214	2745	Halomonas
Echor29_bacteria.out	0.178773	1209	1988	Actinomadura
Echor29_bacteria.out	0.163691	1107	838	Prevotella
Echor29_bacteria.out	0.163543	1106	724	Haemophilus
Echor29_bacteria.out	0.162803	1101	445	Legionella
Echor29_bacteria.out	0.15955	1079	261963	Kangiella
Echor29_bacteria.out	0.153044	1035	40323	Stenotrophomonas
Echor29_bacteria.out	0.151565	1025	1822464	Paraburkholderia
Echor29_bacteria.out	0.15127	1023	1663	Arthrobacter
Echor29_bacteria.out	0.14846	1004	1827	Rhodococcus
Echor29_bacteria.out	0.147721	999	105	Runella
Echor29_bacteria.out	0.145059	981	1716	Corynebacterium
Echor29_bacteria.out	0.142545	964	2053	Gordonia
Echor29_bacteria.out	0.136335	922	590	Salmonella
Echor29_bacteria.out	0.134856	912	1854	Frankia
Echor29_bacteria.out	0.134708	911	482	Neisseria
Echor29_bacteria.out	0.132638	897	68	Lysobacter
Echor29_bacteria.out	0.13042	882	423349	Mucilaginibacter
Echor29_bacteria.out	0.126576	856	347533	Zobellella
Echor29_bacteria.out	0.119182	806	407	Methylobacterium
Echor29_bacteria.out	0.116816	790	283	Comamonas
Echor29_bacteria.out	0.113119	765	89966	Hymenobacter
Echor29_bacteria.out	0.11031	746	39643	Sorangium
Echor29_bacteria.out	0.109423	740	872	Desulfovibrio
Echor29_bacteria.out	0.106318	719	1177	Nostoc
Echor29_bacteria.out	0.106022	717	2742	Marinobacter
Echor29_bacteria.out	0.104247	705	1865	Actinoplanes
Echor29_bacteria.out	0.100994	683	1847	Pseudonocardia
Echor29_bacteria.out	1.79882	12165	10239	Viruses
Echor29_bacteria.out	42.2894	285993	NA	cannot be assigned to a (non-viral) genus
Echor29_bacteria.out	23.4846	158821	NA	belong to a (non-viral) genus with less than 0.1% of all reads
Echor29_bacteria.out	97.3465	24810026	NA	unclassified
Echor30_bacteria.out	2.51437	16845	1883	Streptomyces
Echor30_bacteria.out	2.32182	15555	469	Acinetobacter
Echor30_bacteria.out	1.50997	10116	286	Pseudomonas
Echor30_bacteria.out	1.38847	9302	1386	Bacillus
Echor30_bacteria.out	1.33279	8929	1279	Staphylococcus
Echor30_bacteria.out	1.1577	7756	573657	Candidatus Hodgkinia
Echor30_bacteria.out	0.921265	6172	662	Vibrio
Echor30_bacteria.out	0.909772	6095	570	Klebsiella
Echor30_bacteria.out	0.810511	5430	1350	Enterococcus
Echor30_bacteria.out	0.757074	5072	561	Escherichia
Echor30_bacteria.out	0.727668	4875	1023	Microscilla
Echor30_bacteria.out	0.697965	4676	13687	Sphingomonas
Echor30_bacteria.out	0.677963	4542	1578	Lactobacillus
Echor30_bacteria.out	0.648856	4347	953	Wolbachia
Echor30_bacteria.out	0.642289	4303	44249	Paenibacillus
Echor30_bacteria.out	0.607062	4067	1485	Clostridium
Echor30_bacteria.out	0.525862	3523	1156568	Methylovirgula
Echor30_bacteria.out	0.474067	3176	1301	Streptococcus
Echor30_bacteria.out	0.447497	2998	810	Chlamydia
Echor30_bacteria.out	0.445408	2984	335927	Thalassobius
Echor30_bacteria.out	0.431825	2893	33882	Microbacterium
Echor30_bacteria.out	0.419883	2813	33926	Candidatus Phytoplasma
Echor30_bacteria.out	0.415256	2782	69965	Macrococcus
Echor30_bacteria.out	0.405106	2714	209	Helicobacter
Echor30_bacteria.out	0.398091	2667	237	Flavobacterium
Echor30_bacteria.out	0.39003	2613	32008	Burkholderia
Echor30_bacteria.out	0.378238	2534	1763	Mycobacterium
Echor30_bacteria.out	0.353162	2366	194	Campylobacter
Echor30_bacteria.out	0.319577	2141	965	Oceanospirillum
Echor30_bacteria.out	0.315248	2112	323620	Shinella
Echor30_bacteria.out	0.301665	2021	1839	Nocardioides
Echor30_bacteria.out	0.281067	1883	1866885	Mycolicibacterium
Echor30_bacteria.out	0.267782	1794	547	Enterobacter
Echor30_bacteria.out	0.261065	1749	171	Leptospira
Echor30_bacteria.out	0.260169	1743	246873	Crocinitomix
Echor30_bacteria.out	0.258975	1735	59732	Chryseobacterium
Echor30_bacteria.out	0.254945	1708	374	Bradyrhizobium
Echor30_bacteria.out	0.241959	1621	816	Bacteroides
Echor30_bacteria.out	0.238377	1597	768	Anaplasma
Echor30_bacteria.out	0.23778	1593	32	Myxococcus
Echor30_bacteria.out	0.234944	1574	1817	Nocardia
Echor30_bacteria.out	0.232257	1556	2100210	Caedimonas
Echor30_bacteria.out	0.225391	1510	379	Rhizobium
Echor30_bacteria.out	0.210912	1413	68287	Mesorhizobium
Echor30_bacteria.out	0.203449	1363	655184	Candidatus Thioglobus
Echor30_bacteria.out	0.201657	1351	482	Neisseria
Echor30_bacteria.out	0.20121	1348	84567	Pedobacter
Echor30_bacteria.out	0.199418	1336	53335	Pantoea
Echor30_bacteria.out	0.19912	1334	334857	Goodfellowiella
Echor30_bacteria.out	0.197179	1321	583	Proteus
Echor30_bacteria.out	0.196732	1318	2093	Mycoplasma
Echor30_bacteria.out	0.192552	1290	1873	Micromonospora
Echor30_bacteria.out	0.189418	1269	1129	Synechococcus
Echor30_bacteria.out	0.187029	1253	1813	Amycolatopsis
Echor30_bacteria.out	0.181208	1214	79328	Chitinophaga
Echor30_bacteria.out	0.178223	1194	53246	Pseudoalteromonas
Echor30_bacteria.out	0.17061	1143	2745	Halomonas
Echor30_bacteria.out	0.169864	1138	1988	Actinomadura
Echor30_bacteria.out	0.165535	1109	261963	Kangiella
Echor30_bacteria.out	0.165386	1108	724	Haemophilus
Echor30_bacteria.out	0.161356	1081	838	Prevotella
Echor30_bacteria.out	0.160609	1076	1822464	Paraburkholderia
Echor30_bacteria.out	0.157176	1053	445	Legionella
Echor30_bacteria.out	0.153594	1029	40323	Stenotrophomonas
Echor30_bacteria.out	0.150907	1011	1854	Frankia
Echor30_bacteria.out	0.148668	996	1827	Rhodococcus
Echor30_bacteria.out	0.145235	973	1716	Corynebacterium
Echor30_bacteria.out	0.14016	939	105	Runella
Echor30_bacteria.out	0.138667	929	2053	Gordonia
Echor30_bacteria.out	0.13822	926	1663	Arthrobacter
Echor30_bacteria.out	0.131503	881	407	Methylobacterium
Echor30_bacteria.out	0.127622	855	68	Lysobacter
Echor30_bacteria.out	0.125532	841	423349	Mucilaginibacter
Echor30_bacteria.out	0.122995	824	347533	Zobellella
Echor30_bacteria.out	0.118815	796	283	Comamonas
Echor30_bacteria.out	0.116576	781	590	Salmonella
Echor30_bacteria.out	0.111949	750	39643	Sorangium
Echor30_bacteria.out	0.106725	715	1177	Nostoc
Echor30_bacteria.out	0.104038	697	89966	Hymenobacter
Echor30_bacteria.out	0.103739	695	1865	Actinoplanes
Echor30_bacteria.out	1.83044	12263	10239	Viruses
Echor30_bacteria.out	41.8649	280473	NA	cannot be assigned to a (non-viral) genus
Echor30_bacteria.out	23.7899	159380	NA	belong to a (non-viral) genus with less than 0.1% of all reads
Echor30_bacteria.out	97.3304	24425400	NA	unclassified
Echor31_bacteria.out	5.49088	39098	59732	Chryseobacterium
Echor31_bacteria.out	4.75161	33834	497	Psychrobacter
Echor31_bacteria.out	2.56877	18291	1298	Deinococcus
Echor31_bacteria.out	2.07161	14751	469	Acinetobacter
Echor31_bacteria.out	1.96502	13992	1883	Streptomyces
Echor31_bacteria.out	1.3492	9607	286	Pseudomonas
Echor31_bacteria.out	1.19134	8483	1386	Bacillus
Echor31_bacteria.out	0.973944	6935	1485	Clostridium
Echor31_bacteria.out	0.859487	6120	662	Vibrio
Echor31_bacteria.out	0.830275	5912	570	Klebsiella
Echor31_bacteria.out	0.743063	5291	1279	Staphylococcus
Echor31_bacteria.out	0.718767	5118	1350	Enterococcus
Echor31_bacteria.out	0.664979	4735	1023	Microscilla
Echor31_bacteria.out	0.636329	4531	561	Escherichia
Echor31_bacteria.out	0.604449	4304	44249	Paenibacillus
Echor31_bacteria.out	0.600938	4279	1578	Lactobacillus
Echor31_bacteria.out	0.583664	4156	573657	Candidatus Hodgkinia
Echor31_bacteria.out	0.516394	3677	237	Flavobacterium
Echor31_bacteria.out	0.446456	3179	13687	Sphingomonas
Echor31_bacteria.out	0.414576	2952	1301	Streptococcus
Echor31_bacteria.out	0.395195	2814	33882	Microbacterium
Echor31_bacteria.out	0.375815	2676	69965	Macrococcus
Echor31_bacteria.out	0.369635	2632	209	Helicobacter
Echor31_bacteria.out	0.362192	2579	810	Chlamydia
Echor31_bacteria.out	0.349693	2490	475	Moraxella
Echor31_bacteria.out	0.323993	2307	1763	Mycobacterium
Echor31_bacteria.out	0.323852	2306	32008	Burkholderia
Echor31_bacteria.out	0.307702	2191	34084	Riemerella
Echor31_bacteria.out	0.293517	2090	953	Wolbachia
Echor31_bacteria.out	0.271188	1931	1839	Nocardioides
Echor31_bacteria.out	0.262621	1870	1433995	Cruoricaptor
Echor31_bacteria.out	0.261357	1861	965	Oceanospirillum
Echor31_bacteria.out	0.258408	1840	1866885	Mycolicibacterium
Echor31_bacteria.out	0.251667	1792	194	Campylobacter
Echor31_bacteria.out	0.244364	1740	1156568	Methylovirgula
Echor31_bacteria.out	0.229196	1632	335927	Thalassobius
Echor31_bacteria.out	0.228354	1626	246873	Crocinitomix
Echor31_bacteria.out	0.226669	1614	547	Enterobacter
Echor31_bacteria.out	0.218242	1554	171	Leptospira
Echor31_bacteria.out	0.216557	1542	816	Bacteroides
Echor31_bacteria.out	0.216136	1539	32	Myxococcus
Echor31_bacteria.out	0.213186	1518	768	Anaplasma
Echor31_bacteria.out	0.206445	1470	84567	Pedobacter
Echor31_bacteria.out	0.204339	1455	1817	Nocardia
Echor31_bacteria.out	0.197738	1408	334857	Goodfellowiella
Echor31_bacteria.out	0.194368	1384	655184	Candidatus Thioglobus
Echor31_bacteria.out	0.192682	1372	374	Bradyrhizobium
Echor31_bacteria.out	0.189312	1348	379	Rhizobium
Echor31_bacteria.out	0.187486	1335	1873	Micromonospora
Echor31_bacteria.out	0.184818	1316	583	Proteus
Echor31_bacteria.out	0.182009	1296	68287	Mesorhizobium
Echor31_bacteria.out	0.181728	1294	308865	Elizabethkingia
Echor31_bacteria.out	0.181447	1292	79328	Chitinophaga
Echor31_bacteria.out	0.177094	1261	53246	Pseudoalteromonas
Echor31_bacteria.out	0.174566	1243	33926	Candidatus Phytoplasma
Echor31_bacteria.out	0.172178	1226	2093	Mycoplasma
Echor31_bacteria.out	0.172038	1225	53335	Pantoea
Echor31_bacteria.out	0.170493	1214	1813	Amycolatopsis
Echor31_bacteria.out	0.168948	1203	1129	Synechococcus
Echor31_bacteria.out	0.167684	1194	2745	Halomonas
Echor31_bacteria.out	0.162207	1155	1988	Actinomadura
Echor31_bacteria.out	0.149427	1064	724	Haemophilus
Echor31_bacteria.out	0.147461	1050	1663	Arthrobacter
Echor31_bacteria.out	0.14704	1047	838	Prevotella
Echor31_bacteria.out	0.141843	1010	323620	Shinella
Echor31_bacteria.out	0.141703	1009	261963	Kangiella
Echor31_bacteria.out	0.134821	960	445	Legionella
Echor31_bacteria.out	0.134681	959	501783	Cloacibacterium
Echor31_bacteria.out	0.133838	953	89966	Hymenobacter
Echor31_bacteria.out	0.132434	943	40323	Stenotrophomonas
Echor31_bacteria.out	0.130327	928	2053	Gordonia
Echor31_bacteria.out	0.128642	916	1827	Rhodococcus
Echor31_bacteria.out	0.128221	913	1822464	Paraburkholderia
Echor31_bacteria.out	0.127378	907	105	Runella
Echor31_bacteria.out	0.127378	907	407	Methylobacterium
Echor31_bacteria.out	0.123165	877	347533	Zobellella
Echor31_bacteria.out	0.122744	874	1716	Corynebacterium
Echor31_bacteria.out	0.110947	790	423349	Mucilaginibacter
Echor31_bacteria.out	0.108559	773	68	Lysobacter
Echor31_bacteria.out	0.108559	773	1854	Frankia
Echor31_bacteria.out	0.106453	758	2100210	Caedimonas
Echor31_bacteria.out	0.106312	757	590	Salmonella
Echor31_bacteria.out	0.103363	736	28453	Sphingobacterium
Echor31_bacteria.out	0.101257	721	872	Desulfovibrio
Echor31_bacteria.out	0.100695	717	283	Comamonas
Echor31_bacteria.out	0.100133	713	2715289	Amniculibacterium
Echor31_bacteria.out	1.70465	12138	10239	Viruses
Echor31_bacteria.out	35.4269	252258	NA	cannot be assigned to a (non-viral) genus
Echor31_bacteria.out	22.1222	157522	NA	belong to a (non-viral) genus with less than 0.1% of all reads
Echor31_bacteria.out	96.8912	22192540	NA	unclassified
Echor32_bacteria.out	5.6121	70105	497	Psychrobacter
Echor32_bacteria.out	4.91812	61436	59732	Chryseobacterium
Echor32_bacteria.out	2.08193	26007	469	Acinetobacter
Echor32_bacteria.out	1.99659	24941	1883	Streptomyces
Echor32_bacteria.out	1.60706	20075	1485	Clostridium
Echor32_bacteria.out	1.39052	17370	286	Pseudomonas
Echor32_bacteria.out	1.2726	15897	1386	Bacillus
Echor32_bacteria.out	0.991773	12389	1298	Deinococcus
Echor32_bacteria.out	0.86649	10824	662	Vibrio
Echor32_bacteria.out	0.857685	10714	570	Klebsiella
Echor32_bacteria.out	0.730881	9130	1350	Enterococcus
Echor32_bacteria.out	0.66868	8353	1023	Microscilla
Echor32_bacteria.out	0.665878	8318	1279	Staphylococcus
Echor32_bacteria.out	0.621929	7769	44249	Paenibacillus
Echor32_bacteria.out	0.618647	7728	1578	Lactobacillus
Echor32_bacteria.out	0.611282	7636	561	Escherichia
Echor32_bacteria.out	0.529308	6612	237	Flavobacterium
Echor32_bacteria.out	0.451657	5642	573657	Candidatus Hodgkinia
Echor32_bacteria.out	0.418355	5226	1301	Streptococcus
Echor32_bacteria.out	0.398502	4978	33882	Microbacterium
Echor32_bacteria.out	0.380891	4758	209	Helicobacter
Echor32_bacteria.out	0.378009	4722	69965	Macrococcus
Echor32_bacteria.out	0.376168	4699	13687	Sphingomonas
Echor32_bacteria.out	0.347829	4345	810	Chlamydia
Echor32_bacteria.out	0.340144	4249	1763	Mycobacterium
Echor32_bacteria.out	0.317249	3963	32008	Burkholderia
Echor32_bacteria.out	0.310364	3877	475	Moraxella
Echor32_bacteria.out	0.290351	3627	34084	Riemerella
Echor32_bacteria.out	0.281225	3513	1866885	Mycolicibacterium
Echor32_bacteria.out	0.261852	3271	1839	Nocardioides
Echor32_bacteria.out	0.259131	3237	965	Oceanospirillum
Echor32_bacteria.out	0.253767	3170	194	Campylobacter
Echor32_bacteria.out	0.234554	2930	547	Enterobacter
Echor32_bacteria.out	0.231112	2887	246873	Crocinitomix
Echor32_bacteria.out	0.231032	2886	816	Bacteroides
Echor32_bacteria.out	0.230071	2874	953	Wolbachia
Echor32_bacteria.out	0.22719	2838	171	Leptospira
Echor32_bacteria.out	0.222066	2774	1433995	Cruoricaptor
Echor32_bacteria.out	0.217263	2714	32	Myxococcus
Echor32_bacteria.out	0.216302	2702	84567	Pedobacter
Echor32_bacteria.out	0.210619	2631	583	Proteus
Echor32_bacteria.out	0.210218	2626	374	Bradyrhizobium
Echor32_bacteria.out	0.209658	2619	1817	Nocardia
Echor32_bacteria.out	0.205495	2567	334857	Goodfellowiella
Echor32_bacteria.out	0.202934	2535	379	Rhizobium
Echor32_bacteria.out	0.194608	2431	68287	Mesorhizobium
Echor32_bacteria.out	0.193407	2416	79328	Chitinophaga
Echor32_bacteria.out	0.191486	2392	1156568	Methylovirgula
Echor32_bacteria.out	0.190766	2383	768	Anaplasma
Echor32_bacteria.out	0.183961	2298	335927	Thalassobius
Echor32_bacteria.out	0.18204	2274	53246	Pseudoalteromonas
Echor32_bacteria.out	0.179878	2247	655184	Candidatus Thioglobus
Echor32_bacteria.out	0.178678	2232	53335	Pantoea
Echor32_bacteria.out	0.176916	2210	1873	Micromonospora
Echor32_bacteria.out	0.176836	2209	2093	Mycoplasma
Echor32_bacteria.out	0.172834	2159	1129	Synechococcus
Echor32_bacteria.out	0.170993	2136	308865	Elizabethkingia
Echor32_bacteria.out	0.168031	2099	2745	Halomonas
Echor32_bacteria.out	0.164428	2054	1813	Amycolatopsis
Echor32_bacteria.out	0.158584	1981	724	Haemophilus
Echor32_bacteria.out	0.156423	1954	838	Prevotella
Echor32_bacteria.out	0.156263	1952	1988	Actinomadura
Echor32_bacteria.out	0.155222	1939	445	Legionella
Echor32_bacteria.out	0.154582	1931	1663	Arthrobacter
Echor32_bacteria.out	0.145136	1813	261963	Kangiella
Echor32_bacteria.out	0.144335	1803	1716	Corynebacterium
Echor32_bacteria.out	0.141453	1767	105	Runella
Echor32_bacteria.out	0.138251	1727	40323	Stenotrophomonas
Echor32_bacteria.out	0.137851	1722	1822464	Paraburkholderia
Echor32_bacteria.out	0.134969	1686	347533	Zobellella
Echor32_bacteria.out	0.133048	1662	1827	Rhodococcus
Echor32_bacteria.out	0.126483	1580	33926	Candidatus Phytoplasma
Echor32_bacteria.out	0.125363	1566	2053	Gordonia
Echor32_bacteria.out	0.122881	1535	89966	Hymenobacter
Echor32_bacteria.out	0.12128	1515	501783	Cloacibacterium
Echor32_bacteria.out	0.119919	1498	423349	Mucilaginibacter
Echor32_bacteria.out	0.119279	1490	407	Methylobacterium
Echor32_bacteria.out	0.115436	1442	28453	Sphingobacterium
Echor32_bacteria.out	0.113915	1423	68	Lysobacter
Echor32_bacteria.out	0.113114	1413	590	Salmonella
Echor32_bacteria.out	0.109512	1368	1854	Frankia
Echor32_bacteria.out	0.10583	1322	872	Desulfovibrio
Echor32_bacteria.out	0.105109	1313	1177	Nostoc
Echor32_bacteria.out	0.103908	1298	2742	Marinobacter
Echor32_bacteria.out	0.103188	1289	283	Comamonas
Echor32_bacteria.out	0.102387	1279	39643	Sorangium
Echor32_bacteria.out	0.102147	1276	1865	Actinoplanes
Echor32_bacteria.out	0.100146	1251	1847	Pseudonocardia
Echor32_bacteria.out	1.72826	21589	10239	Viruses
Echor32_bacteria.out	35.5112	443598	NA	cannot be assigned to a (non-viral) genus
Echor32_bacteria.out	22.6142	282491	NA	belong to a (non-viral) genus with less than 0.1% of all reads
Echor32_bacteria.out	96.9608	39853589	NA	unclassified
Echor33_bacteria.out	6.94262	69878	59732	Chryseobacterium
Echor33_bacteria.out	5.47786	55135	497	Psychrobacter
Echor33_bacteria.out	1.96899	19818	469	Acinetobacter
Echor33_bacteria.out	1.88772	19000	1883	Streptomyces
Echor33_bacteria.out	1.46099	14705	286	Pseudomonas
Echor33_bacteria.out	1.26924	12775	1386	Bacillus
Echor33_bacteria.out	0.949422	9556	1298	Deinococcus
Echor33_bacteria.out	0.932035	9381	662	Vibrio
Echor33_bacteria.out	0.839338	8448	570	Klebsiella
Echor33_bacteria.out	0.799597	8048	1023	Microscilla
Echor33_bacteria.out	0.717928	7226	1350	Enterococcus
Echor33_bacteria.out	0.628113	6322	1578	Lactobacillus
Echor33_bacteria.out	0.612316	6163	44249	Paenibacillus
Echor33_bacteria.out	0.578237	5820	237	Flavobacterium
Echor33_bacteria.out	0.535913	5394	561	Escherichia
Echor33_bacteria.out	0.533429	5369	1485	Clostridium
Echor33_bacteria.out	0.51485	5182	475	Moraxella
Echor33_bacteria.out	0.430896	4337	34084	Riemerella
Echor33_bacteria.out	0.402084	4047	209	Helicobacter
Echor33_bacteria.out	0.389863	3924	33882	Microbacterium
Echor33_bacteria.out	0.36423	3666	1279	Staphylococcus
Echor33_bacteria.out	0.362442	3648	965	Oceanospirillum
Echor33_bacteria.out	0.352009	3543	69965	Macrococcus
Echor33_bacteria.out	0.340783	3430	1433995	Cruoricaptor
Echor33_bacteria.out	0.339789	3420	1763	Mycobacterium
Echor33_bacteria.out	0.334325	3365	32008	Burkholderia
Echor33_bacteria.out	0.322303	3244	1301	Streptococcus
Echor33_bacteria.out	0.301439	3034	1866885	Mycolicibacterium
Echor33_bacteria.out	0.288324	2902	13687	Sphingomonas
Echor33_bacteria.out	0.286138	2880	810	Chlamydia
Echor33_bacteria.out	0.267758	2695	1839	Nocardioides
Echor33_bacteria.out	0.255637	2573	32	Myxococcus
Echor33_bacteria.out	0.237753	2393	84567	Pedobacter
Echor33_bacteria.out	0.236759	2383	816	Bacteroides
Echor33_bacteria.out	0.232288	2338	573657	Candidatus Hodgkinia
Echor33_bacteria.out	0.231494	2330	547	Enterobacter
Echor33_bacteria.out	0.230898	2324	308865	Elizabethkingia
Echor33_bacteria.out	0.228513	2300	194	Campylobacter
Echor33_bacteria.out	0.228414	2299	171	Leptospira
Echor33_bacteria.out	0.209437	2108	1817	Nocardia
Echor33_bacteria.out	0.207649	2090	374	Bradyrhizobium
Echor33_bacteria.out	0.207053	2084	583	Proteus
Echor33_bacteria.out	0.20596	2073	79328	Chitinophaga
Echor33_bacteria.out	0.205463	2068	68287	Mesorhizobium
Echor33_bacteria.out	0.202681	2040	379	Rhizobium
Echor33_bacteria.out	0.193541	1948	53335	Pantoea
Echor33_bacteria.out	0.185791	1870	1129	Synechococcus
Echor33_bacteria.out	0.181618	1828	1813	Amycolatopsis
Echor33_bacteria.out	0.17983	1810	1873	Micromonospora
Echor33_bacteria.out	0.178041	1792	2093	Mycoplasma
Echor33_bacteria.out	0.176949	1781	2745	Halomonas
Echor33_bacteria.out	0.174465	1756	501783	Cloacibacterium
Echor33_bacteria.out	0.172875	1740	334857	Goodfellowiella
Echor33_bacteria.out	0.171484	1726	53246	Pseudoalteromonas
Echor33_bacteria.out	0.166616	1677	1988	Actinomadura
Echor33_bacteria.out	0.165324	1664	445	Legionella
Echor33_bacteria.out	0.164132	1652	838	Prevotella
Echor33_bacteria.out	0.159164	1602	724	Haemophilus
Echor33_bacteria.out	0.15827	1593	347533	Zobellella
Echor33_bacteria.out	0.157177	1582	105	Runella
Echor33_bacteria.out	0.15668	1577	261963	Kangiella
Echor33_bacteria.out	0.152905	1539	89966	Hymenobacter
Echor33_bacteria.out	0.148533	1495	655184	Candidatus Thioglobus
Echor33_bacteria.out	0.14595	1469	2053	Gordonia
Echor33_bacteria.out	0.142274	1432	1716	Corynebacterium
Echor33_bacteria.out	0.141181	1421	1663	Arthrobacter
Echor33_bacteria.out	0.138896	1398	1822464	Paraburkholderia
Echor33_bacteria.out	0.134723	1356	40323	Stenotrophomonas
Echor33_bacteria.out	0.134624	1355	1827	Rhodococcus
Echor33_bacteria.out	0.129954	1308	28453	Sphingobacterium
Echor33_bacteria.out	0.12906	1299	68	Lysobacter
Echor33_bacteria.out	0.12608	1269	407	Methylobacterium
Echor33_bacteria.out	0.124391	1252	2715289	Amniculibacterium
Echor33_bacteria.out	0.123298	1241	768	Anaplasma
Echor33_bacteria.out	0.122602	1234	107	Spirosoma
Echor33_bacteria.out	0.120715	1215	872	Desulfovibrio
Echor33_bacteria.out	0.119423	1202	246873	Crocinitomix
Echor33_bacteria.out	0.118131	1189	423349	Mucilaginibacter
Echor33_bacteria.out	0.116244	1170	335927	Thalassobius
Echor33_bacteria.out	0.115846	1166	590	Salmonella
Echor33_bacteria.out	0.112965	1137	59735	Bergeyella
Echor33_bacteria.out	0.111276	1120	283	Comamonas
Echor33_bacteria.out	0.109587	1103	1854	Frankia
Echor33_bacteria.out	0.106507	1072	34072	Variovorax
Echor33_bacteria.out	0.106507	1072	944321	Soonwooa
Echor33_bacteria.out	0.106209	1069	953	Wolbachia
Echor33_bacteria.out	0.103427	1041	2742	Marinobacter
Echor33_bacteria.out	1.70848	17196	10239	Viruses
Echor33_bacteria.out	34.6587	348842	NA	cannot be assigned to a (non-viral) genus
Echor33_bacteria.out	23.0986	232489	NA	belong to a (non-viral) genus with less than 0.1% of all reads
Echor33_bacteria.out	96.8607	31054739	NA	unclassified
Echor34_bacteria.out	8.74556	134087	497	Psychrobacter
Echor34_bacteria.out	5.88847	90282	535	Chromobacterium
Echor34_bacteria.out	5.08407	77949	400060	Paludibacterium
Echor34_bacteria.out	3.05518	46842	407217	Aquitalea
Echor34_bacteria.out	2.42793	37225	568394	Pseudogulbenkiania
Echor34_bacteria.out	2.01102	30833	59732	Chryseobacterium
Echor34_bacteria.out	1.93693	29697	1654931	Crenobacter
Echor34_bacteria.out	1.93223	29625	286	Pseudomonas
Echor34_bacteria.out	1.88416	28888	57739	Vogesella
Echor34_bacteria.out	1.58466	24296	1298	Deinococcus
Echor34_bacteria.out	1.50385	23057	397456	Gulbenkiania
Echor34_bacteria.out	0.879403	13483	1883	Streptomyces
Echor34_bacteria.out	0.850965	13047	469	Acinetobacter
Echor34_bacteria.out	0.781568	11983	151754	Xenophilus
Echor34_bacteria.out	0.748369	11474	475	Moraxella
Echor34_bacteria.out	0.747522	11461	32008	Burkholderia
Echor34_bacteria.out	0.506001	7758	662	Vibrio
Echor34_bacteria.out	0.464845	7127	1386	Bacillus
Echor34_bacteria.out	0.422906	6484	1822464	Paraburkholderia
Echor34_bacteria.out	0.389838	5977	187	Aquaspirillum
Echor34_bacteria.out	0.355205	5446	482	Neisseria
Echor34_bacteria.out	0.33766	5177	149698	Massilia
Echor34_bacteria.out	0.331137	5077	57479	Microvirgula
Echor34_bacteria.out	0.315223	4833	570	Klebsiella
Echor34_bacteria.out	0.305179	4679	29580	Janthinobacterium
Echor34_bacteria.out	0.301787	4627	240411	Chitinimonas
Echor34_bacteria.out	0.291221	4465	168470	Laribacter
Echor34_bacteria.out	0.269632	4134	44249	Paenibacillus
Echor34_bacteria.out	0.250652	3843	397275	Andreprevotia
Echor34_bacteria.out	0.230824	3539	561	Escherichia
Echor34_bacteria.out	0.227759	3492	1350	Enterococcus
Echor34_bacteria.out	0.223389	3425	34072	Variovorax
Echor34_bacteria.out	0.21941	3364	106589	Cupriavidus
Echor34_bacteria.out	0.219084	3359	1023	Microscilla
Echor34_bacteria.out	0.205844	3156	1485	Clostridium
Echor34_bacteria.out	0.205127	3145	517	Bordetella
Echor34_bacteria.out	0.202387	3103	1578	Lactobacillus
Echor34_bacteria.out	0.200104	3068	237	Flavobacterium
Echor34_bacteria.out	0.198343	3041	642	Aeromonas
Echor34_bacteria.out	0.186995	2867	1763	Mycobacterium
Echor34_bacteria.out	0.186538	2860	222	Achromobacter
Echor34_bacteria.out	0.183994	2821	12960	Azoarcus
Echor34_bacteria.out	0.183472	2813	374	Bradyrhizobium
Echor34_bacteria.out	0.176037	2699	12916	Acidovorax
Echor34_bacteria.out	0.175711	2694	2745	Halomonas
Echor34_bacteria.out	0.172319	2642	75654	Duganella
Echor34_bacteria.out	0.169906	2605	32014	Iodobacter
Echor34_bacteria.out	0.167949	2575	13687	Sphingomonas
Echor34_bacteria.out	0.164558	2523	93217	Pandoraea
Echor34_bacteria.out	0.154774	2373	963	Herbaspirillum
Echor34_bacteria.out	0.15347	2353	33057	Thauera
Echor34_bacteria.out	0.150339	2305	1866885	Mycolicibacterium
Echor34_bacteria.out	0.149883	2298	33882	Microbacterium
Echor34_bacteria.out	0.147795	2266	379	Rhizobium
Echor34_bacteria.out	0.142056	2178	68287	Mesorhizobium
Echor34_bacteria.out	0.141404	2168	40323	Stenotrophomonas
Echor34_bacteria.out	0.137816	2113	53335	Pantoea
Echor34_bacteria.out	0.136903	2099	209	Helicobacter
Echor34_bacteria.out	0.133838	2052	22	Shewanella
Echor34_bacteria.out	0.130707	2004	1649488	Rivicola
Echor34_bacteria.out	0.130577	2002	34084	Riemerella
Echor34_bacteria.out	0.127315	1952	202907	Collimonas
Echor34_bacteria.out	0.126076	1933	2742	Marinobacter
Echor34_bacteria.out	0.123728	1897	650341	Leeia
Echor34_bacteria.out	0.121054	1856	230666	Chitinibacter
Echor34_bacteria.out	0.120597	1849	1279	Staphylococcus
Echor34_bacteria.out	0.119945	1839	1301	Streptococcus
Echor34_bacteria.out	0.119554	1833	1433992	Chitinivorax
Echor34_bacteria.out	0.117402	1800	551208	Chitinilyticum
Echor34_bacteria.out	0.116619	1788	69965	Macrococcus
Echor34_bacteria.out	0.114597	1757	283	Comamonas
Echor34_bacteria.out	0.113292	1737	53246	Pseudoalteromonas
Echor34_bacteria.out	0.10964	1681	68	Lysobacter
Echor34_bacteria.out	0.107357	1646	32	Myxococcus
Echor34_bacteria.out	0.105074	1611	657	Photobacterium
Echor34_bacteria.out	0.103444	1586	613	Serratia
Echor34_bacteria.out	0.103444	1586	1817	Nocardia
Echor34_bacteria.out	0.103379	1585	1433987	Amantichitinum
Echor34_bacteria.out	0.103183	1582	445	Legionella
Echor34_bacteria.out	0.102596	1573	547	Enterobacter
Echor34_bacteria.out	0.102335	1569	96	Gallionella
Echor34_bacteria.out	0.100574	1542	507	Alcaligenes
Echor34_bacteria.out	0.566593	8687	10239	Viruses
Echor34_bacteria.out	27.525	422014	NA	cannot be assigned to a (non-viral) genus
Echor34_bacteria.out	19.3347	296439	NA	belong to a (non-viral) genus with less than 0.1% of all reads
Echor34_bacteria.out	91.6506	16829893	NA	unclassified
Echor35_bacteria.out	3.84406	43054	497	Psychrobacter
Echor35_bacteria.out	2.25997	25312	1883	Streptomyces
Echor35_bacteria.out	2.22747	24948	469	Acinetobacter
Echor35_bacteria.out	1.66391	18636	286	Pseudomonas
Echor35_bacteria.out	1.43757	16101	1386	Bacillus
Echor35_bacteria.out	0.990077	11089	662	Vibrio
Echor35_bacteria.out	0.938024	10506	570	Klebsiella
Echor35_bacteria.out	0.820258	9187	1350	Enterococcus
Echor35_bacteria.out	0.786865	8813	1023	Microscilla
Echor35_bacteria.out	0.689545	7723	1578	Lactobacillus
Echor35_bacteria.out	0.685527	7678	561	Escherichia
Echor35_bacteria.out	0.680884	7626	1279	Staphylococcus
Echor35_bacteria.out	0.667492	7476	44249	Paenibacillus
Echor35_bacteria.out	0.645528	7230	1485	Clostridium
Echor35_bacteria.out	0.59035	6612	573657	Candidatus Hodgkinia
Echor35_bacteria.out	0.466066	5220	237	Flavobacterium
Echor35_bacteria.out	0.453209	5076	1301	Streptococcus
Echor35_bacteria.out	0.442137	4952	69965	Macrococcus
Echor35_bacteria.out	0.440887	4938	209	Helicobacter
Echor35_bacteria.out	0.439369	4921	59732	Chryseobacterium
Echor35_bacteria.out	0.436155	4885	33882	Microbacterium
Echor35_bacteria.out	0.394459	4418	810	Chlamydia
Echor35_bacteria.out	0.390977	4379	32008	Burkholderia
Echor35_bacteria.out	0.388031	4346	1763	Mycobacterium
Echor35_bacteria.out	0.33446	3746	965	Oceanospirillum
Echor35_bacteria.out	0.310621	3479	1839	Nocardioides
Echor35_bacteria.out	0.300621	3367	13687	Sphingomonas
Echor35_bacteria.out	0.298836	3347	1866885	Mycolicibacterium
Echor35_bacteria.out	0.291961	3270	953	Wolbachia
Echor35_bacteria.out	0.28455	3187	194	Campylobacter
Echor35_bacteria.out	0.273032	3058	1156568	Methylovirgula
Echor35_bacteria.out	0.26464	2964	547	Enterobacter
Echor35_bacteria.out	0.262407	2939	32	Myxococcus
Echor35_bacteria.out	0.257318	2882	816	Bacteroides
Echor35_bacteria.out	0.255443	2861	171	Leptospira
Echor35_bacteria.out	0.237586	2661	374	Bradyrhizobium
Echor35_bacteria.out	0.233836	2619	583	Proteus
Echor35_bacteria.out	0.233211	2612	1817	Nocardia
Echor35_bacteria.out	0.22214	2488	768	Anaplasma
Echor35_bacteria.out	0.221426	2480	379	Rhizobium
Echor35_bacteria.out	0.221426	2480	335927	Thalassobius
Echor35_bacteria.out	0.216337	2423	246873	Crocinitomix
Echor35_bacteria.out	0.20973	2349	84567	Pedobacter
Echor35_bacteria.out	0.20964	2348	68287	Mesorhizobium
Echor35_bacteria.out	0.20964	2348	655184	Candidatus Thioglobus
Echor35_bacteria.out	0.208926	2340	53335	Pantoea
Echor35_bacteria.out	0.205801	2305	2093	Mycoplasma
Echor35_bacteria.out	0.203837	2283	53246	Pseudoalteromonas
Echor35_bacteria.out	0.202944	2273	334857	Goodfellowiella
Echor35_bacteria.out	0.201337	2255	1129	Synechococcus
Echor35_bacteria.out	0.193748	2170	1873	Micromonospora
Echor35_bacteria.out	0.18848	2111	79328	Chitinophaga
Echor35_bacteria.out	0.185623	2079	1716	Corynebacterium
Echor35_bacteria.out	0.181694	2035	1988	Actinomadura
Echor35_bacteria.out	0.177676	1990	1813	Amycolatopsis
Echor35_bacteria.out	0.175623	1967	2745	Halomonas
Echor35_bacteria.out	0.174819	1958	1298	Deinococcus
Echor35_bacteria.out	0.173926	1948	445	Legionella
Echor35_bacteria.out	0.170891	1914	1663	Arthrobacter
Echor35_bacteria.out	0.170534	1910	724	Haemophilus
Echor35_bacteria.out	0.168926	1892	33926	Candidatus Phytoplasma
Echor35_bacteria.out	0.168837	1891	261963	Kangiella
Echor35_bacteria.out	0.166694	1867	838	Prevotella
Echor35_bacteria.out	0.161069	1804	323620	Shinella
Echor35_bacteria.out	0.158123	1771	347533	Zobellella
Echor35_bacteria.out	0.157855	1768	105	Runella
Echor35_bacteria.out	0.155623	1743	29580	Janthinobacterium
Echor35_bacteria.out	0.152677	1710	1822464	Paraburkholderia
Echor35_bacteria.out	0.15223	1705	40323	Stenotrophomonas
Echor35_bacteria.out	0.149462	1674	2053	Gordonia
Echor35_bacteria.out	0.144998	1624	590	Salmonella
Echor35_bacteria.out	0.141516	1585	1827	Rhodococcus
Echor35_bacteria.out	0.137498	1540	407	Methylobacterium
Echor35_bacteria.out	0.132588	1485	475	Moraxella
Echor35_bacteria.out	0.130088	1457	68	Lysobacter
Echor35_bacteria.out	0.12482	1398	1854	Frankia
Echor35_bacteria.out	0.120981	1355	22	Shewanella
Echor35_bacteria.out	0.120802	1353	629	Yersinia
Echor35_bacteria.out	0.116695	1307	872	Desulfovibrio
Echor35_bacteria.out	0.115802	1297	423349	Mucilaginibacter
Echor35_bacteria.out	0.113391	1270	39643	Sorangium
Echor35_bacteria.out	0.112856	1264	283	Comamonas
Echor35_bacteria.out	0.111606	1250	1177	Nostoc
Echor35_bacteria.out	0.110534	1238	262	Francisella
Echor35_bacteria.out	0.110534	1238	1865	Actinoplanes
Echor35_bacteria.out	0.107142	1200	2742	Marinobacter
Echor35_bacteria.out	0.106784	1196	89966	Hymenobacter
Echor35_bacteria.out	0.104999	1176	2100210	Caedimonas
Echor35_bacteria.out	0.104195	1167	265487	Blastopirellula
Echor35_bacteria.out	0.101784	1140	1847	Pseudonocardia
Echor35_bacteria.out	2.00837	22494	10239	Viruses
Echor35_bacteria.out	38.7716	434247	NA	cannot be assigned to a (non-viral) genus
Echor35_bacteria.out	24.3154	272336	NA	belong to a (non-viral) genus with less than 0.1% of all reads
Echor35_bacteria.out	97.311	40532554	NA	unclassified
Echor36_bacteria.out	12.0367	61167	497	Psychrobacter
Echor36_bacteria.out	2.34192	11901	1883	Streptomyces
Echor36_bacteria.out	2.3065	11721	469	Acinetobacter
Echor36_bacteria.out	1.65357	8403	286	Pseudomonas
Echor36_bacteria.out	1.20412	6119	1386	Bacillus
Echor36_bacteria.out	1.02151	5191	29580	Janthinobacterium
Echor36_bacteria.out	0.930984	4731	662	Vibrio
Echor36_bacteria.out	0.907173	4610	570	Klebsiella
Echor36_bacteria.out	0.763915	3882	1350	Enterococcus
Echor36_bacteria.out	0.746007	3791	59732	Chryseobacterium
Echor36_bacteria.out	0.7281	3700	1023	Microscilla
Echor36_bacteria.out	0.63935	3249	561	Escherichia
Echor36_bacteria.out	0.625379	3178	1578	Lactobacillus
Echor36_bacteria.out	0.563195	2862	44249	Paenibacillus
Echor36_bacteria.out	0.466968	2373	1485	Clostridium
Echor36_bacteria.out	0.457719	2326	1279	Staphylococcus
Echor36_bacteria.out	0.452209	2298	32008	Burkholderia
Echor36_bacteria.out	0.441583	2244	69965	Macrococcus
Echor36_bacteria.out	0.417575	2122	33882	Microbacterium
Echor36_bacteria.out	0.416394	2116	1763	Mycobacterium
Echor36_bacteria.out	0.366805	1864	1866885	Mycolicibacterium
Echor36_bacteria.out	0.365624	1858	209	Helicobacter
Echor36_bacteria.out	0.36346	1847	1301	Streptococcus
Echor36_bacteria.out	0.360508	1832	475	Moraxella
Echor36_bacteria.out	0.341026	1733	237	Flavobacterium
Echor36_bacteria.out	0.315051	1601	810	Chlamydia
Echor36_bacteria.out	0.295372	1501	13687	Sphingomonas
Echor36_bacteria.out	0.281991	1433	1839	Nocardioides
Echor36_bacteria.out	0.271168	1378	32	Myxococcus
Echor36_bacteria.out	0.258967	1316	965	Oceanospirillum
Echor36_bacteria.out	0.256016	1301	1817	Nocardia
Echor36_bacteria.out	0.246964	1255	547	Enterobacter
Echor36_bacteria.out	0.230827	1173	768	Anaplasma
Echor36_bacteria.out	0.229056	1164	655184	Candidatus Thioglobus
Echor36_bacteria.out	0.218233	1109	68287	Mesorhizobium
Echor36_bacteria.out	0.216265	1099	1873	Micromonospora
Echor36_bacteria.out	0.210755	1071	246873	Crocinitomix
Echor36_bacteria.out	0.210362	1069	1813	Amycolatopsis
Echor36_bacteria.out	0.20741	1054	379	Rhizobium
Echor36_bacteria.out	0.204262	1038	1129	Synechococcus
Echor36_bacteria.out	0.204065	1037	374	Bradyrhizobium
Echor36_bacteria.out	0.201703	1025	816	Bacteroides
Echor36_bacteria.out	0.201507	1024	334857	Goodfellowiella
Echor36_bacteria.out	0.200916	1021	53335	Pantoea
Echor36_bacteria.out	0.198948	1011	1988	Actinomadura
Echor36_bacteria.out	0.196193	997	194	Campylobacter
Echor36_bacteria.out	0.19029	967	1663	Arthrobacter
Echor36_bacteria.out	0.189503	963	261963	Kangiella
Echor36_bacteria.out	0.184583	938	724	Haemophilus
Echor36_bacteria.out	0.18419	936	171	Leptospira
Echor36_bacteria.out	0.182419	927	2745	Halomonas
Echor36_bacteria.out	0.180057	915	583	Proteus
Echor36_bacteria.out	0.177499	902	53246	Pseudoalteromonas
[truncated: 1,043 more rows]
