# Supplementary material for: Patterns of Microbiome Variation Among Infrapopulations of Permanent Bloodsucking Parasites
Source: Frontiers journal article supplement (doi:10.3389/fmicb.2021.642543), 2021-04-16
Supplement: Table_2.XLS [file Table_2.XLS]

## Sheet: Table_S3
Sample file	Percentaje of reads assigned to this taxon	Number of assigned reads per taxon	Taxon Id	Taxon
Echor02_bacteria.out	6.37473	106971	1906665	archaeon
Echor02_bacteria.out	1.80031	30210	470	Acinetobacter baumannii
Echor02_bacteria.out	1.08322	18177	1973976	Deltaproteobacteria bacterium CG11_big_fil_rev_8_21_14_0_20_49_13
Echor02_bacteria.out	0.906947	15219	573	Klebsiella pneumoniae
Echor02_bacteria.out	0.792766	13303	573658	Candidatus Hodgkinia cicadicola
Echor02_bacteria.out	0.790085	13258	1027	Microscilla marina
Echor02_bacteria.out	0.684605	11488	562	Escherichia coli
Echor02_bacteria.out	0.667979	11209	1352	Enterococcus faecium
Echor02_bacteria.out	0.621138	10423	2026724	Chloroflexi bacterium
Echor02_bacteria.out	0.578231	9703	1978231	Acidobacteria bacterium
Echor02_bacteria.out	0.573524	9624	670	Vibrio parahaemolyticus
Echor02_bacteria.out	0.52567	8821	2026735	Deltaproteobacteria bacterium
Echor02_bacteria.out	0.486696	8167	1280	Staphylococcus aureus
Echor02_bacteria.out	0.480916	8070	77133	uncultured bacterium
Echor02_bacteria.out	0.421502	7073	69966	Macrococcus caseolyticus
Echor02_bacteria.out	0.393374	6601	2026780	Planctomycetes bacterium
Echor02_bacteria.out	0.361313	6063	1428	Bacillus thuringiensis
Echor02_bacteria.out	0.34993	5872	2604685	Nitriliruptoraceae bacterium ZYF776
Echor02_bacteria.out	0.328239	5508	569860	Methylovirgula ligni
Echor02_bacteria.out	0.320789	5383	1891241	Betaproteobacteria bacterium
Echor02_bacteria.out	0.318346	5342	64969	Oceanospirillum multiglobuliferum
Echor02_bacteria.out	0.317571	5329	2497945	Thalassobius sp. ZQ172
Echor02_bacteria.out	0.311612	5229	210	Helicobacter pylori
Echor02_bacteria.out	0.29141	4890	287	Pseudomonas aeruginosa
Echor02_bacteria.out	0.286583	4809	553151	Pseudomonas pelagia
Echor02_bacteria.out	0.285689	4794	33883	Microbacterium arborescens
Echor02_bacteria.out	0.282531	4741	955	Wolbachia pipientis
Echor02_bacteria.out	0.278657	4676	1396	Bacillus cereus
Echor02_bacteria.out	0.271208	4551	1898104	Bacteroidetes bacterium
Echor02_bacteria.out	0.266977	4480	1895707	Alphaproteobacteria bacterium 43-37
Echor02_bacteria.out	0.25923	4350	86473	uncultured Gammaproteobacteria bacterium
Echor02_bacteria.out	0.228897	3841	813	Chlamydia trachomatis
Echor02_bacteria.out	0.225083	3777	1838287	Gammaproteobacteria bacterium 2W06
Echor02_bacteria.out	0.221686	3720	1977087	Proteobacteria bacterium
Echor02_bacteria.out	0.219958	3691	35779	Aster yellows phytoplasma
Echor02_bacteria.out	0.21823	3662	1913988	Alphaproteobacteria bacterium
Echor02_bacteria.out	0.214356	3597	2250255	Methanosarcinales archaeon
Echor02_bacteria.out	0.214297	3596	2026739	Euryarchaeota archaeon
Echor02_bacteria.out	0.210661	3535	2026799	Verrucomicrobia bacterium
Echor02_bacteria.out	0.207801	3487	1913989	Gammaproteobacteria bacterium
Echor02_bacteria.out	0.206669	3468	1550035	Streptomyces sp. NBRC 109706
Echor02_bacteria.out	0.206192	3460	584	Proteus mirabilis
Echor02_bacteria.out	0.203212	3410	1869227	bacterium
Echor02_bacteria.out	0.198206	3326	985762	Staphylococcus agnetis
Echor02_bacteria.out	0.19326	3243	1883427	Actinobacteria bacterium
Echor02_bacteria.out	0.191353	3211	1892852	Goodfellowiella sp. AN110305
Echor02_bacteria.out	0.185811	3118	948	Anaplasma phagocytophilum
Echor02_bacteria.out	0.180627	3031	75922	Mycolicibacterium tusciae
Echor02_bacteria.out	0.179315	3009	1870904	Shinella sp.
Echor02_bacteria.out	0.169006	2836	238013	Lactobacillus rennini
Echor02_bacteria.out	0.163285	2740	1629334	Caedimonas varicaedens
Echor02_bacteria.out	0.160127	2687	796379	Kangiella spongicola
Echor02_bacteria.out	0.154525	2593	1309	Streptococcus mutans
Echor02_bacteria.out	0.154346	2590	655186	uncultured SUP05 cluster bacterium
Echor02_bacteria.out	0.146182	2453	106	Runella slithyformis
Echor02_bacteria.out	0.145288	2438	2059725	Zobellella maritima
Echor02_bacteria.out	0.142249	2387	470934	Pantoea vagans
Echor02_bacteria.out	0.141176	2369	2219161	Crocinitomix sp. SM1701
Echor02_bacteria.out	0.133429	2239	1909294	Rhizobiales bacterium
Echor02_bacteria.out	0.132714	2227	158836	Enterobacter hormaechei
Echor02_bacteria.out	0.123179	2067	28901	Salmonella enterica
Echor02_bacteria.out	0.120378	2020	1581066	Corynebacterium sp. HMSC28B08
Echor02_bacteria.out	0.116564	1956	2250277	Thermoprotei archaeon
Echor02_bacteria.out	0.114061	1914	197	Campylobacter jejuni
Echor02_bacteria.out	0.11275	1892	83554	Chlamydia psittaci
Echor02_bacteria.out	0.111379	1869	2053489	Candidatus Lokiarchaeota archaeon
Echor02_bacteria.out	0.110664	1857	56	Sorangium cellulosum
Echor02_bacteria.out	0.108996	1829	1773	Mycobacterium tuberculosis
Echor02_bacteria.out	0.100474	1686	1638099	Salinarimonas sp. BN140002
Echor02_bacteria.out	1.98212	33261	10239	Viruses
Echor02_bacteria.out	23.7484	398509	NA	cannot be assigned to a (non-viral) species
Echor02_bacteria.out	46.1913	775113	NA	belong to a (non-viral) species with less than 0.1% of all reads
Echor02_bacteria.out	97.4705	64660948	NA	unclassified
Echor03_bacteria.out	4.86274	113708	1906665	archaeon
Echor03_bacteria.out	1.35848	31766	470	Acinetobacter baumannii
Echor03_bacteria.out	0.792866	18540	1973976	Deltaproteobacteria bacterium CG11_big_fil_rev_8_21_14_0_20_49_13
Echor03_bacteria.out	0.698911	16343	540500	Psychrobacter lutiphocae
Echor03_bacteria.out	0.68172	15941	1002339	Psychrobacter sp. 1501(2011)
Echor03_bacteria.out	0.68142	15934	573	Klebsiella pneumoniae
Echor03_bacteria.out	0.679154	15881	2488563	Psychrobacter pygoscelis
Echor03_bacteria.out	0.629461	14719	1975705	Psychrobacter sp. FDAARGOS_221
Echor03_bacteria.out	0.608164	14221	536441	Chryseobacterium taklimakanense
Echor03_bacteria.out	0.605341	14155	1027	Microscilla marina
Echor03_bacteria.out	0.54594	12766	573658	Candidatus Hodgkinia cicadicola
Echor03_bacteria.out	0.526739	12317	1352	Enterococcus faecium
Echor03_bacteria.out	0.520581	12173	562	Escherichia coli
Echor03_bacteria.out	0.459384	10742	2026724	Chloroflexi bacterium
Echor03_bacteria.out	0.448564	10489	670	Vibrio parahaemolyticus
Echor03_bacteria.out	0.441166	10316	1978231	Acidobacteria bacterium
Echor03_bacteria.out	0.396048	9261	77133	uncultured bacterium
Echor03_bacteria.out	0.388008	9073	2026735	Deltaproteobacteria bacterium
Echor03_bacteria.out	0.387281	9056	29432	Psychrobacter phenylpyruvicus
Echor03_bacteria.out	0.325913	7621	1280	Staphylococcus aureus
Echor03_bacteria.out	0.324331	7584	69966	Macrococcus caseolyticus
Echor03_bacteria.out	0.304189	7113	1118202	Cruoricaptor ignavus
Echor03_bacteria.out	0.289777	6776	2026780	Planctomycetes bacterium
Echor03_bacteria.out	0.287339	6719	1945520	Psychrobacter pasteurii
Echor03_bacteria.out	0.279599	6538	1871047	Chryseobacterium sp.
Echor03_bacteria.out	0.274937	6429	1913989	Gammaproteobacteria bacterium
Echor03_bacteria.out	0.262535	6139	1428	Bacillus thuringiensis
Echor03_bacteria.out	0.254453	5950	64969	Oceanospirillum multiglobuliferum
Echor03_bacteria.out	0.250775	5864	2604685	Nitriliruptoraceae bacterium ZYF776
Echor03_bacteria.out	0.23508	5497	553151	Pseudomonas pelagia
Echor03_bacteria.out	0.226228	5290	86473	uncultured Gammaproteobacteria bacterium
Echor03_bacteria.out	0.226057	5286	287	Pseudomonas aeruginosa
Echor03_bacteria.out	0.226014	5285	33883	Microbacterium arborescens
Echor03_bacteria.out	0.223619	5229	1891241	Betaproteobacteria bacterium
Echor03_bacteria.out	0.223106	5217	1898104	Bacteroidetes bacterium
Echor03_bacteria.out	0.222935	5213	569860	Methylovirgula ligni
Echor03_bacteria.out	0.215921	5049	210	Helicobacter pylori
Echor03_bacteria.out	0.215708	5044	1396	Bacillus cereus
Echor03_bacteria.out	0.203562	4760	2497945	Thalassobius sp. ZQ172
Echor03_bacteria.out	0.199328	4661	34085	Riemerella anatipestifer
Echor03_bacteria.out	0.194282	4543	421525	Chryseobacterium haifense
Echor03_bacteria.out	0.190134	4446	2602768	Chryseobacterium sp. legu1
Echor03_bacteria.out	0.188381	4405	1945521	Psychrobacter piechaudii
Echor03_bacteria.out	0.184232	4308	237258	Cloacibacterium normanense
Echor03_bacteria.out	0.180811	4228	955	Wolbachia pipientis
Echor03_bacteria.out	0.174696	4085	1838287	Gammaproteobacteria bacterium 2W06
Echor03_bacteria.out	0.173156	4049	1977087	Proteobacteria bacterium
Echor03_bacteria.out	0.167169	3909	1913988	Alphaproteobacteria bacterium
Echor03_bacteria.out	0.167041	3906	1895707	Alphaproteobacteria bacterium 43-37
Echor03_bacteria.out	0.166827	3901	813	Chlamydia trachomatis
Echor03_bacteria.out	0.165801	3877	2250255	Methanosarcinales archaeon
Echor03_bacteria.out	0.160925	3763	232216	Chryseobacterium koreense
Echor03_bacteria.out	0.158103	3697	2026799	Verrucomicrobia bacterium
Echor03_bacteria.out	0.15434	3609	1869227	bacterium
Echor03_bacteria.out	0.151859	3551	985762	Staphylococcus agnetis
Echor03_bacteria.out	0.151432	3541	948	Anaplasma phagocytophilum
Echor03_bacteria.out	0.14955	3497	2026739	Euryarchaeota archaeon
Echor03_bacteria.out	0.147069	3439	1892852	Goodfellowiella sp. AN110305
Echor03_bacteria.out	0.14677	3432	493376	Chryseobacterium palustre
Echor03_bacteria.out	0.145487	3402	1550035	Streptomyces sp. NBRC 109706
Echor03_bacteria.out	0.144375	3376	1883427	Actinobacteria bacterium
Echor03_bacteria.out	0.143905	3365	90241	Moraxella lincolnii
Echor03_bacteria.out	0.143605	3358	584	Proteus mirabilis
Echor03_bacteria.out	0.14151	3309	35779	Aster yellows phytoplasma
Echor03_bacteria.out	0.139586	3264	45610	Psychrobacter urativorans
Echor03_bacteria.out	0.137747	3221	238013	Lactobacillus rennini
Echor03_bacteria.out	0.129023	3017	512012	Flavobacteriaceae bacterium JJC
Echor03_bacteria.out	0.127269	2976	75922	Mycolicibacterium tusciae
Echor03_bacteria.out	0.127055	2971	1870904	Shinella sp.
Echor03_bacteria.out	0.126713	2963	2479858	Amniculibacterium aquaticum
Echor03_bacteria.out	0.123035	2877	2010998	Chryseobacterium sp. VAUSW3
Echor03_bacteria.out	0.121838	2849	2039166	Chryseobacterium sp. 6424
Echor03_bacteria.out	0.11893	2781	45611	Psychrobacter frigidicola
Echor03_bacteria.out	0.11893	2781	796379	Kangiella spongicola
Echor03_bacteria.out	0.118374	2768	1895745	Chryseobacterium sp. 39-10
Echor03_bacteria.out	0.117433	2746	531844	Flavobacteriaceae bacterium 3519-10
Echor03_bacteria.out	0.117262	2742	1309	Streptococcus mutans
Echor03_bacteria.out	0.114525	2678	1125876	Chryseobacterium frigidisoli
Echor03_bacteria.out	0.114226	2671	1629334	Caedimonas varicaedens
Echor03_bacteria.out	0.111617	2610	655186	uncultured SUP05 cluster bacterium
Echor03_bacteria.out	0.111403	2605	106	Runella slithyformis
Echor03_bacteria.out	0.109778	2567	619805	Soonwooa buanensis
Echor03_bacteria.out	0.108709	2542	470934	Pantoea vagans
Echor03_bacteria.out	0.108709	2542	2219161	Crocinitomix sp. SM1701
Echor03_bacteria.out	0.106314	2486	493375	Chryseobacterium humi
Echor03_bacteria.out	0.102807	2404	2059725	Zobellella maritima
Echor03_bacteria.out	1.66592	38955	10239	Viruses
Echor03_bacteria.out	28.4743	665829	NA	cannot be assigned to a (non-viral) species
Echor03_bacteria.out	42.3737	990845	NA	belong to a (non-viral) species with less than 0.1% of all reads
Echor03_bacteria.out	96.7722	70104919	NA	unclassified
Echor04_bacteria.out	5.55562	96481	1906665	archaeon
Echor04_bacteria.out	2.1104	36650	1973976	Deltaproteobacteria bacterium CG11_big_fil_rev_8_21_14_0_20_49_13
Echor04_bacteria.out	2.0671	35898	470	Acinetobacter baumannii
Echor04_bacteria.out	1.40104	24331	1280	Staphylococcus aureus
Echor04_bacteria.out	1.28231	22269	573658	Candidatus Hodgkinia cicadicola
Echor04_bacteria.out	0.790378	13726	573	Klebsiella pneumoniae
Echor04_bacteria.out	0.722949	12555	2026724	Chloroflexi bacterium
Echor04_bacteria.out	0.717421	12459	562	Escherichia coli
Echor04_bacteria.out	0.688572	11958	1027	Microscilla marina
Echor04_bacteria.out	0.641124	11134	569860	Methylovirgula ligni
Echor04_bacteria.out	0.618034	10733	86473	uncultured Gammaproteobacteria bacterium
Echor04_bacteria.out	0.580605	10083	1352	Enterococcus faecium
Echor04_bacteria.out	0.548877	9532	955	Wolbachia pipientis
Echor04_bacteria.out	0.541046	9396	1891241	Betaproteobacteria bacterium
Echor04_bacteria.out	0.506323	8793	1978231	Acidobacteria bacterium
Echor04_bacteria.out	0.489509	8501	670	Vibrio parahaemolyticus
Echor04_bacteria.out	0.478741	8314	2497945	Thalassobius sp. ZQ172
Echor04_bacteria.out	0.464749	8071	2026735	Deltaproteobacteria bacterium
Echor04_bacteria.out	0.435785	7568	1550035	Streptomyces sp. NBRC 109706
Echor04_bacteria.out	0.435785	7568	1895707	Alphaproteobacteria bacterium 43-37
Echor04_bacteria.out	0.426111	7400	35779	Aster yellows phytoplasma
Echor04_bacteria.out	0.410564	7130	77133	uncultured bacterium
Echor04_bacteria.out	0.387128	6723	69966	Macrococcus caseolyticus
Echor04_bacteria.out	0.370371	6432	1428	Bacillus thuringiensis
Echor04_bacteria.out	0.346992	6026	2026780	Planctomycetes bacterium
Echor04_bacteria.out	0.346071	6010	1870904	Shinella sp.
Echor04_bacteria.out	0.31417	5456	64969	Oceanospirillum multiglobuliferum
Echor04_bacteria.out	0.310946	5400	1510197	Streptomyces sp. PT12
Echor04_bacteria.out	0.302136	5247	2604685	Nitriliruptoraceae bacterium ZYF776
Echor04_bacteria.out	0.289698	5031	489	Neisseria polysaccharea
Echor04_bacteria.out	0.267529	4646	553151	Pseudomonas pelagia
Echor04_bacteria.out	0.259697	4510	210	Helicobacter pylori
Echor04_bacteria.out	0.256645	4457	1629334	Caedimonas varicaedens
Echor04_bacteria.out	0.25607	4447	287	Pseudomonas aeruginosa
Echor04_bacteria.out	0.249332	4330	33883	Microbacterium arborescens
Echor04_bacteria.out	0.244841	4252	1396	Bacillus cereus
Echor04_bacteria.out	0.24058	4178	985762	Staphylococcus agnetis
Echor04_bacteria.out	0.237067	4117	813	Chlamydia trachomatis
Echor04_bacteria.out	0.220138	3823	1898104	Bacteroidetes bacterium
Echor04_bacteria.out	0.215128	3736	1977087	Proteobacteria bacterium
Echor04_bacteria.out	0.214207	3720	948	Anaplasma phagocytophilum
Echor04_bacteria.out	0.201712	3503	1892852	Goodfellowiella sp. AN110305
Echor04_bacteria.out	0.197969	3438	197	Campylobacter jejuni
Echor04_bacteria.out	0.197278	3426	1838287	Gammaproteobacteria bacterium 2W06
Echor04_bacteria.out	0.194744	3382	1309	Streptococcus mutans
Echor04_bacteria.out	0.190483	3308	1913989	Gammaproteobacteria bacterium
Echor04_bacteria.out	0.183746	3191	1913988	Alphaproteobacteria bacterium
Echor04_bacteria.out	0.181443	3151	2026739	Euryarchaeota archaeon
Echor04_bacteria.out	0.181212	3147	2219161	Crocinitomix sp. SM1701
Echor04_bacteria.out	0.180636	3137	2250255	Methanosarcinales archaeon
Echor04_bacteria.out	0.177988	3091	1869227	bacterium
Echor04_bacteria.out	0.176548	3066	2026799	Verrucomicrobia bacterium
Echor04_bacteria.out	0.173323	3010	1883427	Actinobacteria bacterium
Echor04_bacteria.out	0.168659	2929	584	Proteus mirabilis
Echor04_bacteria.out	0.164916	2864	75922	Mycolicibacterium tusciae
Echor04_bacteria.out	0.156221	2713	573499	Frankia sp. Ea1.12
Echor04_bacteria.out	0.156221	2713	655186	uncultured SUP05 cluster bacterium
Echor04_bacteria.out	0.144532	2510	238013	Lactobacillus rennini
Echor04_bacteria.out	0.140674	2443	796379	Kangiella spongicola
Echor04_bacteria.out	0.127603	2216	83554	Chlamydia psittaci
Echor04_bacteria.out	0.126163	2191	106	Runella slithyformis
Echor04_bacteria.out	0.126163	2191	1909294	Rhizobiales bacterium
Echor04_bacteria.out	0.126163	2191	2059725	Zobellella maritima
Echor04_bacteria.out	0.12029	2089	470934	Pantoea vagans
Echor04_bacteria.out	0.113207	1966	28901	Salmonella enterica
Echor04_bacteria.out	0.110155	1913	158836	Enterobacter hormaechei
Echor04_bacteria.out	0.108889	1891	1773	Mycobacterium tuberculosis
Echor04_bacteria.out	0.100309	1742	56	Sorangium cellulosum
Echor04_bacteria.out	0.100194	1740	60520	Lactobacillus paraplantarum
Echor04_bacteria.out	1.76289	30615	10239	Viruses
Echor04_bacteria.out	24.4624	424823	NA	cannot be assigned to a (non-viral) species
Echor04_bacteria.out	42.2055	732956	NA	belong to a (non-viral) species with less than 0.1% of all reads
Echor04_bacteria.out	97.2218	60773732	NA	unclassified
Echor17_bacteria.out	5.95765	47647	1906665	archaeon
Echor17_bacteria.out	1.82292	14579	470	Acinetobacter baumannii
Echor17_bacteria.out	1.64449	13152	1973976	Deltaproteobacteria bacterium CG11_big_fil_rev_8_21_14_0_20_49_13
Echor17_bacteria.out	1.13471	9075	573658	Candidatus Hodgkinia cicadicola
Echor17_bacteria.out	0.830622	6643	573	Klebsiella pneumoniae
Echor17_bacteria.out	0.764727	6116	1027	Microscilla marina
Echor17_bacteria.out	0.728217	5824	1280	Staphylococcus aureus
Echor17_bacteria.out	0.668074	5343	562	Escherichia coli
Echor17_bacteria.out	0.662072	5295	2026724	Chloroflexi bacterium
Echor17_bacteria.out	0.63744	5098	1352	Enterococcus faecium
Echor17_bacteria.out	0.547288	4377	1978231	Acidobacteria bacterium
Echor17_bacteria.out	0.537785	4301	670	Vibrio parahaemolyticus
Echor17_bacteria.out	0.499274	3993	569860	Methylovirgula ligni
Echor17_bacteria.out	0.484019	3871	1891241	Betaproteobacteria bacterium
Echor17_bacteria.out	0.482018	3855	2497945	Thalassobius sp. ZQ172
Echor17_bacteria.out	0.478517	3827	86473	uncultured Gammaproteobacteria bacterium
Echor17_bacteria.out	0.477892	3822	2026735	Deltaproteobacteria bacterium
Echor17_bacteria.out	0.464138	3712	77133	uncultured bacterium
Echor17_bacteria.out	0.430628	3444	955	Wolbachia pipientis
Echor17_bacteria.out	0.406246	3249	1895707	Alphaproteobacteria bacterium 43-37
Echor17_bacteria.out	0.405121	3240	69966	Macrococcus caseolyticus
Echor17_bacteria.out	0.383364	3066	2026780	Planctomycetes bacterium
Echor17_bacteria.out	0.366609	2932	1550035	Streptomyces sp. NBRC 109706
Echor17_bacteria.out	0.342977	2743	35779	Aster yellows phytoplasma
Echor17_bacteria.out	0.337976	2703	64969	Oceanospirillum multiglobuliferum
Echor17_bacteria.out	0.337475	2699	1428	Bacillus thuringiensis
Echor17_bacteria.out	0.324597	2596	2604685	Nitriliruptoraceae bacterium ZYF776
Echor17_bacteria.out	0.316844	2534	1870904	Shinella sp.
Echor17_bacteria.out	0.28421	2273	210	Helicobacter pylori
Echor17_bacteria.out	0.279333	2234	287	Pseudomonas aeruginosa
Echor17_bacteria.out	0.265704	2125	33883	Microbacterium arborescens
Echor17_bacteria.out	0.257202	2057	1396	Bacillus cereus
Echor17_bacteria.out	0.256951	2055	553151	Pseudomonas pelagia
Echor17_bacteria.out	0.245698	1965	1898104	Bacteroidetes bacterium
Echor17_bacteria.out	0.229943	1839	1629334	Caedimonas varicaedens
Echor17_bacteria.out	0.226192	1809	985762	Staphylococcus agnetis
Echor17_bacteria.out	0.225692	1805	813	Chlamydia trachomatis
Echor17_bacteria.out	0.224067	1792	1977087	Proteobacteria bacterium
Echor17_bacteria.out	0.215189	1721	948	Anaplasma phagocytophilum
Echor17_bacteria.out	0.213814	1710	584	Proteus mirabilis
Echor17_bacteria.out	0.207437	1659	1838287	Gammaproteobacteria bacterium 2W06
Echor17_bacteria.out	0.201685	1613	2026799	Verrucomicrobia bacterium
Echor17_bacteria.out	0.201185	1609	1892852	Goodfellowiella sp. AN110305
Echor17_bacteria.out	0.20031	1602	2250255	Methanosarcinales archaeon
Echor17_bacteria.out	0.193933	1551	1913988	Alphaproteobacteria bacterium
Echor17_bacteria.out	0.192432	1539	1913989	Gammaproteobacteria bacterium
Echor17_bacteria.out	0.191932	1535	1869227	bacterium
Echor17_bacteria.out	0.188556	1508	75922	Mycolicibacterium tusciae
Echor17_bacteria.out	0.187806	1502	2026739	Euryarchaeota archaeon
Echor17_bacteria.out	0.175552	1404	2219161	Crocinitomix sp. SM1701
Echor17_bacteria.out	0.175177	1401	1883427	Actinobacteria bacterium
Echor17_bacteria.out	0.173427	1387	1309	Streptococcus mutans
Echor17_bacteria.out	0.165299	1322	655186	uncultured SUP05 cluster bacterium
Echor17_bacteria.out	0.158047	1264	1002339	Psychrobacter sp. 1501(2011)
Echor17_bacteria.out	0.156171	1249	197	Campylobacter jejuni
Echor17_bacteria.out	0.156171	1249	238013	Lactobacillus rennini
Echor17_bacteria.out	0.15017	1201	796379	Kangiella spongicola
Echor17_bacteria.out	0.137541	1100	2059725	Zobellella maritima
Echor17_bacteria.out	0.13554	1084	470934	Pantoea vagans
Echor17_bacteria.out	0.132539	1060	106	Runella slithyformis
Echor17_bacteria.out	0.129664	1037	158836	Enterobacter hormaechei
Echor17_bacteria.out	0.128413	1027	83554	Chlamydia psittaci
Echor17_bacteria.out	0.123412	987	1909294	Rhizobiales bacterium
Echor17_bacteria.out	0.110283	882	60520	Lactobacillus paraplantarum
Echor17_bacteria.out	0.106282	850	28901	Salmonella enterica
Echor17_bacteria.out	0.101405	811	2250277	Thermoprotei archaeon
Echor17_bacteria.out	0.100905	807	2053489	Candidatus Lokiarchaeota archaeon
Echor17_bacteria.out	1.91444	15311	10239	Viruses
Echor17_bacteria.out	24.6578	197204	NA	cannot be assigned to a (non-viral) species
Echor17_bacteria.out	43.7488	349886	NA	belong to a (non-viral) species with less than 0.1% of all reads
Echor17_bacteria.out	97.3737	29652194	NA	unclassified
Echor18_bacteria.out	6.33659	43579	1906665	archaeon
Echor18_bacteria.out	1.77728	12223	470	Acinetobacter baumannii
Echor18_bacteria.out	1.02641	7059	1973976	Deltaproteobacteria bacterium CG11_big_fil_rev_8_21_14_0_20_49_13
Echor18_bacteria.out	0.904126	6218	573	Klebsiella pneumoniae
Echor18_bacteria.out	0.805978	5543	1027	Microscilla marina
Echor18_bacteria.out	0.676713	4654	562	Escherichia coli
Echor18_bacteria.out	0.674387	4638	1352	Enterococcus faecium
Echor18_bacteria.out	0.672496	4625	573658	Candidatus Hodgkinia cicadicola
Echor18_bacteria.out	0.622041	4278	1978231	Acidobacteria bacterium
Echor18_bacteria.out	0.617533	4247	2026724	Chloroflexi bacterium
Echor18_bacteria.out	0.578856	3981	670	Vibrio parahaemolyticus
Echor18_bacteria.out	0.532472	3662	2026735	Deltaproteobacteria bacterium
Echor18_bacteria.out	0.49234	3386	77133	uncultured bacterium
Echor18_bacteria.out	0.424	2916	69966	Macrococcus caseolyticus
Echor18_bacteria.out	0.418911	2881	1280	Staphylococcus aureus
Echor18_bacteria.out	0.396664	2728	2026780	Planctomycetes bacterium
Echor18_bacteria.out	0.347662	2391	2604685	Nitriliruptoraceae bacterium ZYF776
Echor18_bacteria.out	0.335594	2308	1428	Bacillus thuringiensis
Echor18_bacteria.out	0.324252	2230	64969	Oceanospirillum multiglobuliferum
Echor18_bacteria.out	0.321926	2214	210	Helicobacter pylori
Echor18_bacteria.out	0.300842	2069	2497945	Thalassobius sp. ZQ172
Echor18_bacteria.out	0.299824	2062	1396	Bacillus cereus
Echor18_bacteria.out	0.295753	2034	553151	Pseudomonas pelagia
Echor18_bacteria.out	0.289064	1988	1891241	Betaproteobacteria bacterium
Echor18_bacteria.out	0.286156	1968	33883	Microbacterium arborescens
Echor18_bacteria.out	0.28572	1965	86473	uncultured Gammaproteobacteria bacterium
Echor18_bacteria.out	0.282521	1943	287	Pseudomonas aeruginosa
Echor18_bacteria.out	0.267981	1843	569860	Methylovirgula ligni
Echor18_bacteria.out	0.257075	1768	1898104	Bacteroidetes bacterium
Echor18_bacteria.out	0.253295	1742	955	Wolbachia pipientis
Echor18_bacteria.out	0.224359	1543	1977087	Proteobacteria bacterium
Echor18_bacteria.out	0.224214	1542	1838287	Gammaproteobacteria bacterium 2W06
Echor18_bacteria.out	0.222905	1533	35779	Aster yellows phytoplasma
Echor18_bacteria.out	0.217671	1497	1913989	Gammaproteobacteria bacterium
Echor18_bacteria.out	0.216944	1492	1913988	Alphaproteobacteria bacterium
Echor18_bacteria.out	0.209964	1444	2250255	Methanosarcinales archaeon
Echor18_bacteria.out	0.209383	1440	1895707	Alphaproteobacteria bacterium 43-37
Echor18_bacteria.out	0.209092	1438	813	Chlamydia trachomatis
Echor18_bacteria.out	0.205166	1411	584	Proteus mirabilis
Echor18_bacteria.out	0.203566	1400	1869227	bacterium
Echor18_bacteria.out	0.203276	1398	2026739	Euryarchaeota archaeon
Echor18_bacteria.out	0.202112	1390	2026799	Verrucomicrobia bacterium
Echor18_bacteria.out	0.198041	1362	75922	Mycolicibacterium tusciae
Echor18_bacteria.out	0.196005	1348	1550035	Streptomyces sp. NBRC 109706
Echor18_bacteria.out	0.188735	1298	1883427	Actinobacteria bacterium
Echor18_bacteria.out	0.184082	1266	985762	Staphylococcus agnetis
Echor18_bacteria.out	0.180011	1238	948	Anaplasma phagocytophilum
Echor18_bacteria.out	0.17972	1236	1892852	Goodfellowiella sp. AN110305
Echor18_bacteria.out	0.167361	1151	238013	Lactobacillus rennini
Echor18_bacteria.out	0.159945	1100	1870904	Shinella sp.
Echor18_bacteria.out	0.154274	1061	796379	Kangiella spongicola
Echor18_bacteria.out	0.151075	1039	470934	Pantoea vagans
Echor18_bacteria.out	0.150639	1036	1909294	Rhizobiales bacterium
Echor18_bacteria.out	0.145114	998	1309	Streptococcus mutans
Echor18_bacteria.out	0.143951	990	106	Runella slithyformis
Echor18_bacteria.out	0.142787	982	2059725	Zobellella maritima
Echor18_bacteria.out	0.140315	965	2219161	Crocinitomix sp. SM1701
Echor18_bacteria.out	0.139734	961	655186	uncultured SUP05 cluster bacterium
Echor18_bacteria.out	0.132754	913	158836	Enterobacter hormaechei
Echor18_bacteria.out	0.12563	864	1629334	Caedimonas varicaedens
Echor18_bacteria.out	0.12025	827	28901	Salmonella enterica
Echor18_bacteria.out	0.117923	811	56	Sorangium cellulosum
Echor18_bacteria.out	0.117487	808	197	Campylobacter jejuni
Echor18_bacteria.out	0.114433	787	2250277	Thermoprotei archaeon
Echor18_bacteria.out	0.10978	755	2371	Xylella fastidiosa
Echor18_bacteria.out	0.107599	740	2053489	Candidatus Lokiarchaeota archaeon
Echor18_bacteria.out	0.103964	715	83554	Chlamydia psittaci
Echor18_bacteria.out	0.103092	709	1773	Mycobacterium tuberculosis
Echor18_bacteria.out	0.102219	703	2026714	Candidatus Bathyarchaeota archaeon
Echor18_bacteria.out	2.05907	14161	10239	Viruses
Echor18_bacteria.out	23.7997	163679	NA	cannot be assigned to a (non-viral) species
Echor18_bacteria.out	46.6112	320562	NA	belong to a (non-viral) species with less than 0.1% of all reads
Echor18_bacteria.out	97.465	26441463	NA	unclassified
Echor19_bacteria.out	4.62812	35600	1906665	archaeon
Echor19_bacteria.out	2.25478	17344	1973976	Deltaproteobacteria bacterium CG11_big_fil_rev_8_21_14_0_20_49_13
Echor19_bacteria.out	1.48711	11439	470	Acinetobacter baumannii
Echor19_bacteria.out	1.25492	9653	573658	Candidatus Hodgkinia cicadicola
Echor19_bacteria.out	0.755709	5813	1280	Staphylococcus aureus
Echor19_bacteria.out	0.663667	5105	86473	uncultured Gammaproteobacteria bacterium
Echor19_bacteria.out	0.658857	5068	2026724	Chloroflexi bacterium
Echor19_bacteria.out	0.642737	4944	573	Klebsiella pneumoniae
Echor19_bacteria.out	0.642087	4939	569860	Methylovirgula ligni
Echor19_bacteria.out	0.599835	4614	1002339	Psychrobacter sp. 1501(2011)
Echor19_bacteria.out	0.599445	4611	1027	Microscilla marina
Echor19_bacteria.out	0.572275	4402	562	Escherichia coli
Echor19_bacteria.out	0.566425	4357	540500	Psychrobacter lutiphocae
Echor19_bacteria.out	0.559794	4306	2488563	Psychrobacter pygoscelis
Echor19_bacteria.out	0.538084	4139	1891241	Betaproteobacteria bacterium
Echor19_bacteria.out	0.533664	4105	1975705	Psychrobacter sp. FDAARGOS_221
Echor19_bacteria.out	0.498953	3838	955	Wolbachia pipientis
Echor19_bacteria.out	0.497393	3826	1352	Enterococcus faecium
Echor19_bacteria.out	0.483612	3720	2497945	Thalassobius sp. ZQ172
Echor19_bacteria.out	0.455402	3503	1895707	Alphaproteobacteria bacterium 43-37
Echor19_bacteria.out	0.424331	3264	1978231	Acidobacteria bacterium
Echor19_bacteria.out	0.422771	3252	670	Vibrio parahaemolyticus
Echor19_bacteria.out	0.38975	2998	1550035	Streptomyces sp. NBRC 109706
Echor19_bacteria.out	0.38702	2977	2026735	Deltaproteobacteria bacterium
Echor19_bacteria.out	0.38182	2937	1870904	Shinella sp.
Echor19_bacteria.out	0.37376	2875	77133	uncultured bacterium
Echor19_bacteria.out	0.366999	2823	35779	Aster yellows phytoplasma
Echor19_bacteria.out	0.350229	2694	536441	Chryseobacterium taklimakanense
Echor19_bacteria.out	0.327088	2516	29432	Psychrobacter phenylpyruvicus
Echor19_bacteria.out	0.309018	2377	69966	Macrococcus caseolyticus
Echor19_bacteria.out	0.283277	2179	2026780	Planctomycetes bacterium
Echor19_bacteria.out	0.277947	2138	1629334	Caedimonas varicaedens
Echor19_bacteria.out	0.254547	1958	64969	Oceanospirillum multiglobuliferum
Echor19_bacteria.out	0.252466	1942	2604685	Nitriliruptoraceae bacterium ZYF776
Echor19_bacteria.out	0.245316	1887	985762	Staphylococcus agnetis
Echor19_bacteria.out	0.243366	1872	1428	Bacillus thuringiensis
Echor19_bacteria.out	0.235696	1813	1945520	Psychrobacter pasteurii
Echor19_bacteria.out	0.229976	1769	1913989	Gammaproteobacteria bacterium
Echor19_bacteria.out	0.214506	1650	553151	Pseudomonas pelagia
Echor19_bacteria.out	0.212685	1636	33883	Microbacterium arborescens
Echor19_bacteria.out	0.210215	1617	287	Pseudomonas aeruginosa
Echor19_bacteria.out	0.208265	1602	1396	Bacillus cereus
Echor19_bacteria.out	0.204105	1570	948	Anaplasma phagocytophilum
Echor19_bacteria.out	0.202935	1561	1898104	Bacteroidetes bacterium
Echor19_bacteria.out	0.196305	1510	210	Helicobacter pylori
Echor19_bacteria.out	0.184995	1423	1977087	Proteobacteria bacterium
Echor19_bacteria.out	0.184735	1421	1118202	Cruoricaptor ignavus
Echor19_bacteria.out	0.180705	1390	1309	Streptococcus mutans
Echor19_bacteria.out	0.178495	1373	2219161	Crocinitomix sp. SM1701
Echor19_bacteria.out	0.178105	1370	813	Chlamydia trachomatis
Echor19_bacteria.out	0.173814	1337	1892852	Goodfellowiella sp. AN110305
Echor19_bacteria.out	0.169264	1302	1838287	Gammaproteobacteria bacterium 2W06
Echor19_bacteria.out	0.165754	1275	1945521	Psychrobacter piechaudii
Echor19_bacteria.out	0.161464	1242	1871047	Chryseobacterium sp.
Echor19_bacteria.out	0.155224	1194	1913988	Alphaproteobacteria bacterium
Echor19_bacteria.out	0.154444	1188	1869227	bacterium
Echor19_bacteria.out	0.154184	1186	197	Campylobacter jejuni
Echor19_bacteria.out	0.152494	1173	2026799	Verrucomicrobia bacterium
Echor19_bacteria.out	0.150024	1154	655186	uncultured SUP05 cluster bacterium
Echor19_bacteria.out	0.148204	1140	2250255	Methanosarcinales archaeon
Echor19_bacteria.out	0.143524	1104	75922	Mycolicibacterium tusciae
Echor19_bacteria.out	0.143524	1104	1883427	Actinobacteria bacterium
Echor19_bacteria.out	0.141314	1087	2026739	Euryarchaeota archaeon
Echor19_bacteria.out	0.132343	1018	584	Proteus mirabilis
Echor19_bacteria.out	0.126103	970	238013	Lactobacillus rennini
Echor19_bacteria.out	0.123503	950	90241	Moraxella lincolnii
Echor19_bacteria.out	0.120383	926	796379	Kangiella spongicola
Echor19_bacteria.out	0.116743	898	2602768	Chryseobacterium sp. legu1
Echor19_bacteria.out	0.115703	890	83554	Chlamydia psittaci
Echor19_bacteria.out	0.113623	874	34085	Riemerella anatipestifer
Echor19_bacteria.out	0.108163	832	470934	Pantoea vagans
Echor19_bacteria.out	0.107643	828	45610	Psychrobacter urativorans
Echor19_bacteria.out	0.107253	825	421525	Chryseobacterium haifense
Echor19_bacteria.out	0.103093	793	237258	Cloacibacterium normanense
Echor19_bacteria.out	0.102443	788	60520	Lactobacillus paraplantarum
Echor19_bacteria.out	0.102313	787	2059725	Zobellella maritima
Echor19_bacteria.out	0.100233	771	106	Runella slithyformis
Echor19_bacteria.out	1.54691	11899	10239	Viruses
Echor19_bacteria.out	28.4116	218545	NA	cannot be assigned to a (non-viral) species
Echor19_bacteria.out	39.4444	303411	NA	belong to a (non-viral) species with less than 0.1% of all reads
Echor19_bacteria.out	96.7509	22905538	NA	unclassified
Echor20_bacteria.out	5.27016	33308	1906665	archaeon
Echor20_bacteria.out	2.59252	16385	1973976	Deltaproteobacteria bacterium CG11_big_fil_rev_8_21_14_0_20_49_13
Echor20_bacteria.out	1.87766	11867	470	Acinetobacter baumannii
Echor20_bacteria.out	1.60883	10168	573658	Candidatus Hodgkinia cicadicola
Echor20_bacteria.out	0.982103	6207	1280	Staphylococcus aureus
Echor20_bacteria.out	0.780683	4934	569860	Methylovirgula ligni
Echor20_bacteria.out	0.77293	4885	86473	uncultured Gammaproteobacteria bacterium
Echor20_bacteria.out	0.771031	4873	2026724	Chloroflexi bacterium
Echor20_bacteria.out	0.754575	4769	573	Klebsiella pneumoniae
Echor20_bacteria.out	0.720874	4556	562	Escherichia coli
Echor20_bacteria.out	0.699671	4422	955	Wolbachia pipientis
Echor20_bacteria.out	0.688596	4352	1891241	Betaproteobacteria bacterium
Echor20_bacteria.out	0.661223	4179	1027	Microscilla marina
Echor20_bacteria.out	0.581952	3678	1895707	Alphaproteobacteria bacterium 43-37
Echor20_bacteria.out	0.575623	3638	1550035	Streptomyces sp. NBRC 109706
Echor20_bacteria.out	0.560433	3542	2497945	Thalassobius sp. ZQ172
Echor20_bacteria.out	0.556794	3519	1352	Enterococcus faecium
Echor20_bacteria.out	0.489074	3091	35779	Aster yellows phytoplasma
Echor20_bacteria.out	0.478947	3027	1978231	Acidobacteria bacterium
Echor20_bacteria.out	0.477049	3015	670	Vibrio parahaemolyticus
Echor20_bacteria.out	0.469296	2966	1870904	Shinella sp.
Echor20_bacteria.out	0.439391	2777	2026735	Deltaproteobacteria bacterium
Echor20_bacteria.out	0.402366	2543	77133	uncultured bacterium
Echor20_bacteria.out	0.393189	2485	69966	Macrococcus caseolyticus
Echor20_bacteria.out	0.340184	2150	985762	Staphylococcus agnetis
Echor20_bacteria.out	0.333855	2110	1629334	Caedimonas varicaedens
Echor20_bacteria.out	0.333539	2108	2026780	Planctomycetes bacterium
Echor20_bacteria.out	0.332906	2104	2014528	Corynebacterium dentalis
Echor20_bacteria.out	0.294457	1861	64969	Oceanospirillum multiglobuliferum
Echor20_bacteria.out	0.29414	1859	1428	Bacillus thuringiensis
Echor20_bacteria.out	0.291292	1841	2604685	Nitriliruptoraceae bacterium ZYF776
Echor20_bacteria.out	0.267559	1691	2219161	Crocinitomix sp. SM1701
Echor20_bacteria.out	0.265027	1675	948	Anaplasma phagocytophilum
Echor20_bacteria.out	0.255375	1614	210	Helicobacter pylori
Echor20_bacteria.out	0.246989	1561	1309	Streptococcus mutans
Echor20_bacteria.out	0.245724	1553	553151	Pseudomonas pelagia
Echor20_bacteria.out	0.237338	1500	1396	Bacillus cereus
Echor20_bacteria.out	0.235122	1486	287	Pseudomonas aeruginosa
Echor20_bacteria.out	0.232907	1472	1898104	Bacteroidetes bacterium
Echor20_bacteria.out	0.231009	1460	1977087	Proteobacteria bacterium
Echor20_bacteria.out	0.227053	1435	813	Chlamydia trachomatis
Echor20_bacteria.out	0.223889	1415	1892852	Goodfellowiella sp. AN110305
Echor20_bacteria.out	0.222306	1405	33883	Microbacterium arborescens
Echor20_bacteria.out	0.20411	1290	197	Campylobacter jejuni
Echor20_bacteria.out	0.202053	1277	655186	uncultured SUP05 cluster bacterium
Echor20_bacteria.out	0.183066	1157	1838287	Gammaproteobacteria bacterium 2W06
Echor20_bacteria.out	0.182908	1156	1913988	Alphaproteobacteria bacterium
Echor20_bacteria.out	0.180851	1143	1913989	Gammaproteobacteria bacterium
Echor20_bacteria.out	0.173731	1098	2026799	Verrucomicrobia bacterium
Echor20_bacteria.out	0.172624	1091	2026739	Euryarchaeota archaeon
Echor20_bacteria.out	0.171358	1083	1869227	bacterium
Echor20_bacteria.out	0.169459	1071	2250255	Methanosarcinales archaeon
Echor20_bacteria.out	0.166136	1050	584	Proteus mirabilis
Echor20_bacteria.out	0.16582	1048	83554	Chlamydia psittaci
Echor20_bacteria.out	0.165187	1044	75922	Mycolicibacterium tusciae
Echor20_bacteria.out	0.160124	1012	1883427	Actinobacteria bacterium
Echor20_bacteria.out	0.140504	888	60520	Lactobacillus paraplantarum
Echor20_bacteria.out	0.13908	879	796379	Kangiella spongicola
Echor20_bacteria.out	0.138605	876	238013	Lactobacillus rennini
Echor20_bacteria.out	0.121992	771	106	Runella slithyformis
Echor20_bacteria.out	0.120093	759	2059725	Zobellella maritima
Echor20_bacteria.out	0.11946	755	470934	Pantoea vagans
Echor20_bacteria.out	0.111865	707	1909294	Rhizobiales bacterium
Echor20_bacteria.out	0.109175	690	158836	Enterobacter hormaechei
Echor20_bacteria.out	1.66801	10542	10239	Viruses
Echor20_bacteria.out	25.5595	161539	NA	cannot be assigned to a (non-viral) species
Echor20_bacteria.out	40.7586	257599	NA	belong to a (non-viral) species with less than 0.1% of all reads
Echor20_bacteria.out	97.1778	21762653	NA	unclassified
Echor21_bacteria.out	6.26531	55398	1906665	archaeon
Echor21_bacteria.out	1.87717	16598	470	Acinetobacter baumannii
Echor21_bacteria.out	1.00825	8915	1973976	Deltaproteobacteria bacterium CG11_big_fil_rev_8_21_14_0_20_49_13
Echor21_bacteria.out	0.918003	8117	573	Klebsiella pneumoniae
Echor21_bacteria.out	0.79993	7073	1027	Microscilla marina
Echor21_bacteria.out	0.749489	6627	573658	Candidatus Hodgkinia cicadicola
Echor21_bacteria.out	0.733203	6483	562	Escherichia coli
Echor21_bacteria.out	0.664215	5873	1352	Enterococcus faecium
Echor21_bacteria.out	0.633679	5603	2026724	Chloroflexi bacterium
Echor21_bacteria.out	0.581428	5141	670	Vibrio parahaemolyticus
Echor21_bacteria.out	0.564238	4989	1978231	Acidobacteria bacterium
Echor21_bacteria.out	0.511195	4520	2026735	Deltaproteobacteria bacterium
Echor21_bacteria.out	0.486767	4304	77133	uncultured bacterium
Echor21_bacteria.out	0.446957	3952	1280	Staphylococcus aureus
Echor21_bacteria.out	0.434968	3846	69966	Macrococcus caseolyticus
Echor21_bacteria.out	0.385206	3406	2026780	Planctomycetes bacterium
Echor21_bacteria.out	0.352974	3121	2604685	Nitriliruptoraceae bacterium ZYF776
Echor21_bacteria.out	0.341777	3022	1428	Bacillus thuringiensis
Echor21_bacteria.out	0.341212	3017	86473	uncultured Gammaproteobacteria bacterium
Echor21_bacteria.out	0.339515	3002	64969	Oceanospirillum multiglobuliferum
Echor21_bacteria.out	0.332842	2943	569860	Methylovirgula ligni
Echor21_bacteria.out	0.306491	2710	2497945	Thalassobius sp. ZQ172
Echor21_bacteria.out	0.302985	2679	1891241	Betaproteobacteria bacterium
Echor21_bacteria.out	0.301854	2669	210	Helicobacter pylori
Echor21_bacteria.out	0.289413	2559	287	Pseudomonas aeruginosa
Echor21_bacteria.out	0.282515	2498	553151	Pseudomonas pelagia
Echor21_bacteria.out	0.277086	2450	1396	Bacillus cereus
Echor21_bacteria.out	0.268717	2376	1898104	Bacteroidetes bacterium
Echor21_bacteria.out	0.26736	2364	33883	Microbacterium arborescens
Echor21_bacteria.out	0.260574	2304	985762	Staphylococcus agnetis
Echor21_bacteria.out	0.24327	2151	1550035	Streptomyces sp. NBRC 109706
Echor21_bacteria.out	0.238068	2105	955	Wolbachia pipientis
Echor21_bacteria.out	0.232526	2056	1838287	Gammaproteobacteria bacterium 2W06
Echor21_bacteria.out	0.231734	2049	813	Chlamydia trachomatis
Echor21_bacteria.out	0.228455	2020	1977087	Proteobacteria bacterium
Echor21_bacteria.out	0.227097	2008	584	Proteus mirabilis
Echor21_bacteria.out	0.223591	1977	1895707	Alphaproteobacteria bacterium 43-37
Echor21_bacteria.out	0.219407	1940	1913989	Gammaproteobacteria bacterium
Echor21_bacteria.out	0.217597	1924	2026799	Verrucomicrobia bacterium
Echor21_bacteria.out	0.217597	1924	2250255	Methanosarcinales archaeon
Echor21_bacteria.out	0.21624	1912	1913988	Alphaproteobacteria bacterium
Echor21_bacteria.out	0.216127	1911	948	Anaplasma phagocytophilum
Echor21_bacteria.out	0.215449	1905	2026739	Euryarchaeota archaeon
Echor21_bacteria.out	0.212395	1878	2219161	Crocinitomix sp. SM1701
Echor21_bacteria.out	0.209794	1855	1870904	Shinella sp.
Echor21_bacteria.out	0.207192	1832	1892852	Goodfellowiella sp. AN110305
Echor21_bacteria.out	0.205157	1814	75922	Mycolicibacterium tusciae
Echor21_bacteria.out	0.203121	1796	1869227	bacterium
Echor21_bacteria.out	0.193395	1710	35779	Aster yellows phytoplasma
Echor21_bacteria.out	0.192377	1701	1309	Streptococcus mutans
Echor21_bacteria.out	0.190341	1683	1883427	Actinobacteria bacterium
Echor21_bacteria.out	0.171228	1514	655186	uncultured SUP05 cluster bacterium
Echor21_bacteria.out	0.169192	1496	238013	Lactobacillus rennini
Echor21_bacteria.out	0.167722	1483	2059725	Zobellella maritima
Echor21_bacteria.out	0.166025	1468	796379	Kangiella spongicola
Echor21_bacteria.out	0.143067	1265	470934	Pantoea vagans
Echor21_bacteria.out	0.135489	1198	1629334	Caedimonas varicaedens
Echor21_bacteria.out	0.131079	1159	106	Runella slithyformis
Echor21_bacteria.out	0.128364	1135	158836	Enterobacter hormaechei
Echor21_bacteria.out	0.125198	1107	83554	Chlamydia psittaci
Echor21_bacteria.out	0.122483	1083	1909294	Rhizobiales bacterium
Echor21_bacteria.out	0.119317	1055	56	Sorangium cellulosum
Echor21_bacteria.out	0.113323	1002	28901	Salmonella enterica
Echor21_bacteria.out	0.10959	969	2250277	Thermoprotei archaeon
Echor21_bacteria.out	0.108572	960	197	Campylobacter jejuni
Echor21_bacteria.out	0.108459	959	2053489	Candidatus Lokiarchaeota archaeon
Echor21_bacteria.out	0.107894	954	60520	Lactobacillus paraplantarum
Echor21_bacteria.out	0.103709	917	2371	Xylella fastidiosa
Echor21_bacteria.out	0.101447	897	1773	Mycobacterium tuberculosis
Echor21_bacteria.out	0.101334	896	727	Haemophilus influenzae
Echor21_bacteria.out	2.01504	17817	10239	Viruses
Echor21_bacteria.out	23.8875	211214	NA	cannot be assigned to a (non-viral) species
Echor21_bacteria.out	45.7977	404944	NA	belong to a (non-viral) species with less than 0.1% of all reads
Echor21_bacteria.out	97.4268	33477409	NA	unclassified
Echor22_bacteria.out	4.3923	44881	1906665	archaeon
Echor22_bacteria.out	2.18524	22329	1002339	Psychrobacter sp. 1501(2011)
Echor22_bacteria.out	1.58356	16181	470	Acinetobacter baumannii
Echor22_bacteria.out	1.16108	11864	29432	Psychrobacter phenylpyruvicus
Echor22_bacteria.out	1.11841	11428	1945520	Psychrobacter pasteurii
Echor22_bacteria.out	1.09247	11163	540500	Psychrobacter lutiphocae
Echor22_bacteria.out	0.887248	9066	1975705	Psychrobacter sp. FDAARGOS_221
Echor22_bacteria.out	0.871492	8905	1280	Staphylococcus aureus
Echor22_bacteria.out	0.672238	6869	1945521	Psychrobacter piechaudii
Echor22_bacteria.out	0.65883	6732	2488563	Psychrobacter pygoscelis
Echor22_bacteria.out	0.638376	6523	573	Klebsiella pneumoniae
Echor22_bacteria.out	0.540315	5521	1027	Microscilla marina
Echor22_bacteria.out	0.519666	5310	562	Escherichia coli
Echor22_bacteria.out	0.470733	4810	1352	Enterococcus faecium
Echor22_bacteria.out	0.438535	4481	1978231	Acidobacteria bacterium
Echor22_bacteria.out	0.409175	4181	670	Vibrio parahaemolyticus
Echor22_bacteria.out	0.386569	3950	2026735	Deltaproteobacteria bacterium
Echor22_bacteria.out	0.353881	3616	2026724	Chloroflexi bacterium
Echor22_bacteria.out	0.352316	3600	77133	uncultured bacterium
Echor22_bacteria.out	0.32276	3298	1510197	Streptomyces sp. PT12
Echor22_bacteria.out	0.322662	3297	1428	Bacillus thuringiensis
Echor22_bacteria.out	0.29937	3059	2026780	Planctomycetes bacterium
Echor22_bacteria.out	0.298783	3053	489	Neisseria polysaccharea
Echor22_bacteria.out	0.297902	3044	69966	Macrococcus caseolyticus
Echor22_bacteria.out	0.290073	2964	536441	Chryseobacterium taklimakanense
Echor22_bacteria.out	0.257093	2627	1913989	Gammaproteobacteria bacterium
Echor22_bacteria.out	0.243098	2484	2604685	Nitriliruptoraceae bacterium ZYF776
Echor22_bacteria.out	0.234584	2397	210	Helicobacter pylori
Echor22_bacteria.out	0.217163	2219	64969	Oceanospirillum multiglobuliferum
Echor22_bacteria.out	0.215108	2198	33883	Microbacterium arborescens
Echor22_bacteria.out	0.214423	2191	287	Pseudomonas aeruginosa
Echor22_bacteria.out	0.209138	2137	553151	Pseudomonas pelagia
Echor22_bacteria.out	0.196514	2008	1396	Bacillus cereus
Echor22_bacteria.out	0.193969	1982	1898104	Bacteroidetes bacterium
Echor22_bacteria.out	0.180562	1845	584	Proteus mirabilis
Echor22_bacteria.out	0.17283	1766	813	Chlamydia trachomatis
Echor22_bacteria.out	0.171265	1750	1118202	Cruoricaptor ignavus
Echor22_bacteria.out	0.160499	1640	75922	Mycolicibacterium tusciae
Echor22_bacteria.out	0.160206	1637	2026799	Verrucomicrobia bacterium
Echor22_bacteria.out	0.157074	1605	1977087	Proteobacteria bacterium
Echor22_bacteria.out	0.155606	1590	1913988	Alphaproteobacteria bacterium
Echor22_bacteria.out	0.154138	1575	1838287	Gammaproteobacteria bacterium 2W06
Echor22_bacteria.out	0.150713	1540	573658	Candidatus Hodgkinia cicadicola
Echor22_bacteria.out	0.148755	1520	1883427	Actinobacteria bacterium
Echor22_bacteria.out	0.148658	1519	573499	Frankia sp. Ea1.12
Echor22_bacteria.out	0.146896	1501	1869227	bacterium
Echor22_bacteria.out	0.140633	1437	1871047	Chryseobacterium sp.
Echor22_bacteria.out	0.139654	1427	2250255	Methanosarcinales archaeon
Echor22_bacteria.out	0.135446	1384	2026739	Euryarchaeota archaeon
Echor22_bacteria.out	0.131531	1344	2203895	Psychrobacter sp. YP14
Echor22_bacteria.out	0.131042	1339	45611	Psychrobacter frigidicola
Echor22_bacteria.out	0.127714	1305	34059	Moraxella atlantae
Echor22_bacteria.out	0.127323	1301	45610	Psychrobacter urativorans
Echor22_bacteria.out	0.125855	1286	90241	Moraxella lincolnii
Echor22_bacteria.out	0.123115	1258	34062	Moraxella osloensis
Echor22_bacteria.out	0.122625	1253	1892852	Goodfellowiella sp. AN110305
Echor22_bacteria.out	0.117341	1199	34060	Moraxella caviae
Echor22_bacteria.out	0.117243	1198	2059725	Zobellella maritima
Echor22_bacteria.out	0.113426	1159	796379	Kangiella spongicola
Echor22_bacteria.out	0.11049	1129	1773	Mycobacterium tuberculosis
Echor22_bacteria.out	0.110294	1127	349106	Psychrobacter sp. PRwf-1
Echor22_bacteria.out	0.106575	1089	28901	Salmonella enterica
Echor22_bacteria.out	0.103052	1053	1909294	Rhizobiales bacterium
Echor22_bacteria.out	0.102954	1052	106	Runella slithyformis
Echor22_bacteria.out	0.102857	1051	470934	Pantoea vagans
Echor22_bacteria.out	0.102269	1045	238013	Lactobacillus rennini
Echor22_bacteria.out	1.45418	14859	10239	Viruses
Echor22_bacteria.out	29.8087	304589	NA	cannot be assigned to a (non-viral) species
Echor22_bacteria.out	41.8934	428071	NA	belong to a (non-viral) species with less than 0.1% of all reads
Echor22_bacteria.out	96.3401	26897438	NA	unclassified
Echor23_bacteria.out	5.8705	47719	1906665	archaeon
Echor23_bacteria.out	2.07182	16841	470	Acinetobacter baumannii
Echor23_bacteria.out	1.62968	13247	1973976	Deltaproteobacteria bacterium CG11_big_fil_rev_8_21_14_0_20_49_13
Echor23_bacteria.out	1.03339	8400	573658	Candidatus Hodgkinia cicadicola
Echor23_bacteria.out	0.874688	7110	573	Klebsiella pneumoniae
Echor23_bacteria.out	0.775163	6301	1280	Staphylococcus aureus
Echor23_bacteria.out	0.753388	6124	562	Escherichia coli
Echor23_bacteria.out	0.714021	5804	1027	Microscilla marina
Echor23_bacteria.out	0.641192	5212	2026724	Chloroflexi bacterium
Echor23_bacteria.out	0.633934	5153	1352	Enterococcus faecium
Echor23_bacteria.out	0.545604	4435	1978231	Acidobacteria bacterium
Echor23_bacteria.out	0.530472	4312	670	Vibrio parahaemolyticus
Echor23_bacteria.out	0.499839	4063	2026735	Deltaproteobacteria bacterium
Echor23_bacteria.out	0.477695	3883	77133	uncultured bacterium
Echor23_bacteria.out	0.470068	3821	569860	Methylovirgula ligni
Echor23_bacteria.out	0.468715	3810	1891241	Betaproteobacteria bacterium
Echor23_bacteria.out	0.427871	3478	86473	uncultured Gammaproteobacteria bacterium
Echor23_bacteria.out	0.418645	3403	2497945	Thalassobius sp. ZQ172
Echor23_bacteria.out	0.409787	3331	69966	Macrococcus caseolyticus
Echor23_bacteria.out	0.40585	3299	955	Wolbachia pipientis
Echor23_bacteria.out	0.383952	3121	2026780	Planctomycetes bacterium
Echor23_bacteria.out	0.364023	2959	1550035	Streptomyces sp. NBRC 109706
Echor23_bacteria.out	0.359471	2922	985762	Staphylococcus agnetis
Echor23_bacteria.out	0.350367	2848	35779	Aster yellows phytoplasma
Echor23_bacteria.out	0.349137	2838	1895707	Alphaproteobacteria bacterium 43-37
Echor23_bacteria.out	0.327977	2666	1428	Bacillus thuringiensis
Echor23_bacteria.out	0.323549	2630	2604685	Nitriliruptoraceae bacterium ZYF776
Echor23_bacteria.out	0.315429	2564	64969	Oceanospirillum multiglobuliferum
Echor23_bacteria.out	0.292301	2376	210	Helicobacter pylori
Echor23_bacteria.out	0.285166	2318	1870904	Shinella sp.
Echor23_bacteria.out	0.279753	2274	2219161	Crocinitomix sp. SM1701
Echor23_bacteria.out	0.274955	2235	33883	Microbacterium arborescens
Echor23_bacteria.out	0.269788	2193	287	Pseudomonas aeruginosa
Echor23_bacteria.out	0.26216	2131	553151	Pseudomonas pelagia
Echor23_bacteria.out	0.255148	2074	1396	Bacillus cereus
Echor23_bacteria.out	0.254533	2069	948	Anaplasma phagocytophilum
Echor23_bacteria.out	0.248505	2020	1309	Streptococcus mutans
Echor23_bacteria.out	0.247152	2009	1898104	Bacteroidetes bacterium
Echor23_bacteria.out	0.229314	1864	813	Chlamydia trachomatis
Echor23_bacteria.out	0.22796	1853	1892852	Goodfellowiella sp. AN110305
Echor23_bacteria.out	0.212829	1730	655186	uncultured SUP05 cluster bacterium
Echor23_bacteria.out	0.2084	1694	1977087	Proteobacteria bacterium
Echor23_bacteria.out	0.206431	1678	1913988	Alphaproteobacteria bacterium
Echor23_bacteria.out	0.205939	1674	1629334	Caedimonas varicaedens
Echor23_bacteria.out	0.203725	1656	584	Proteus mirabilis
Echor23_bacteria.out	0.197943	1609	1838287	Gammaproteobacteria bacterium 2W06
Echor23_bacteria.out	0.197697	1607	2250255	Methanosarcinales archaeon
Echor23_bacteria.out	0.197451	1605	1869227	bacterium
Echor23_bacteria.out	0.195851	1592	2026799	Verrucomicrobia bacterium
Echor23_bacteria.out	0.195605	1590	2026739	Euryarchaeota archaeon
Echor23_bacteria.out	0.191177	1554	1913989	Gammaproteobacteria bacterium
Echor23_bacteria.out	0.186502	1516	83554	Chlamydia psittaci
Echor23_bacteria.out	0.18601	1512	1883427	Actinobacteria bacterium
Echor23_bacteria.out	0.181827	1478	75922	Mycolicibacterium tusciae
Echor23_bacteria.out	0.161651	1314	197	Campylobacter jejuni
Echor23_bacteria.out	0.158453	1288	238013	Lactobacillus rennini
Echor23_bacteria.out	0.147996	1203	60520	Lactobacillus paraplantarum
Echor23_bacteria.out	0.147504	1199	796379	Kangiella spongicola
Echor23_bacteria.out	0.13188	1072	2059725	Zobellella maritima
Echor23_bacteria.out	0.127451	1036	1909294	Rhizobiales bacterium
Echor23_bacteria.out	0.125114	1017	106	Runella slithyformis
Echor23_bacteria.out	0.124499	1012	470934	Pantoea vagans
Echor23_bacteria.out	0.12007	976	56	Sorangium cellulosum
Echor23_bacteria.out	0.117978	959	158836	Enterobacter hormaechei
Echor23_bacteria.out	0.112565	915	2528593	Clostridia bacterium k32
Echor23_bacteria.out	0.110228	896	28901	Salmonella enterica
Echor23_bacteria.out	0.103831	844	2250277	Thermoprotei archaeon
Echor23_bacteria.out	0.10297	837	2053489	Candidatus Lokiarchaeota archaeon
Echor23_bacteria.out	0.101247	823	1773	Mycobacterium tuberculosis
Echor23_bacteria.out	0.100386	816	106654	Acinetobacter nosocomialis
Echor23_bacteria.out	1.91398	15558	10239	Viruses
Echor23_bacteria.out	24.2697	197279	NA	cannot be assigned to a (non-viral) species
Echor23_bacteria.out	43.5021	353612	NA	belong to a (non-viral) species with less than 0.1% of all reads
Echor23_bacteria.out	97.3079	29381531	NA	unclassified
Echor24_bacteria.out	6.158	42988	1906665	archaeon
Echor24_bacteria.out	1.90249	13281	470	Acinetobacter baumannii
Echor24_bacteria.out	1.6094	11235	1973976	Deltaproteobacteria bacterium CG11_big_fil_rev_8_21_14_0_20_49_13
Echor24_bacteria.out	1.03111	7198	573658	Candidatus Hodgkinia cicadicola
Echor24_bacteria.out	0.903043	6304	573	Klebsiella pneumoniae
Echor24_bacteria.out	0.772113	5390	1027	Microscilla marina
Echor24_bacteria.out	0.696335	4861	562	Escherichia coli
Echor24_bacteria.out	0.65866	4598	1280	Staphylococcus aureus
Echor24_bacteria.out	0.646914	4516	1352	Enterococcus faecium
Echor24_bacteria.out	0.639894	4467	2026724	Chloroflexi bacterium
Echor24_bacteria.out	0.571708	3991	1978231	Acidobacteria bacterium
Echor24_bacteria.out	0.539047	3763	670	Vibrio parahaemolyticus
Echor24_bacteria.out	0.488766	3412	2026735	Deltaproteobacteria bacterium
Echor24_bacteria.out	0.484039	3379	77133	uncultured bacterium
Echor24_bacteria.out	0.479598	3348	569860	Methylovirgula ligni
Echor24_bacteria.out	0.440205	3073	1891241	Betaproteobacteria bacterium
Echor24_bacteria.out	0.435478	3040	86473	uncultured Gammaproteobacteria bacterium
Echor24_bacteria.out	0.421726	2944	2497945	Thalassobius sp. ZQ172
Echor24_bacteria.out	0.417858	2917	69966	Macrococcus caseolyticus
Echor24_bacteria.out	0.387346	2704	2026780	Planctomycetes bacterium
Echor24_bacteria.out	0.375027	2618	955	Wolbachia pipientis
Echor24_bacteria.out	0.353253	2466	1895707	Alphaproteobacteria bacterium 43-37
Echor24_bacteria.out	0.350531	2447	64969	Oceanospirillum multiglobuliferum
Echor24_bacteria.out	0.348096	2430	1550035	Streptomyces sp. NBRC 109706
Echor24_bacteria.out	0.344944	2408	2604685	Nitriliruptoraceae bacterium ZYF776
Echor24_bacteria.out	0.33506	2339	1428	Bacillus thuringiensis
Echor24_bacteria.out	0.310421	2167	35779	Aster yellows phytoplasma
Echor24_bacteria.out	0.303402	2118	1870904	Shinella sp.
Echor24_bacteria.out	0.292945	2045	985762	Staphylococcus agnetis
Echor24_bacteria.out	0.287215	2005	553151	Pseudomonas pelagia
Echor24_bacteria.out	0.287071	2004	210	Helicobacter pylori
Echor24_bacteria.out	0.282487	1972	33883	Microbacterium arborescens
Echor24_bacteria.out	0.276471	1930	287	Pseudomonas aeruginosa
Echor24_bacteria.out	0.273176	1907	1396	Bacillus cereus
Echor24_bacteria.out	0.254411	1776	1898104	Bacteroidetes bacterium
Echor24_bacteria.out	0.238653	1666	813	Chlamydia trachomatis
Echor24_bacteria.out	0.224042	1564	1838287	Gammaproteobacteria bacterium 2W06
Echor24_bacteria.out	0.222896	1556	1892852	Goodfellowiella sp. AN110305
Echor24_bacteria.out	0.221607	1547	948	Anaplasma phagocytophilum
Echor24_bacteria.out	0.221034	1543	1977087	Proteobacteria bacterium
Echor24_bacteria.out	0.215447	1504	2250255	Methanosarcinales archaeon
Echor24_bacteria.out	0.211149	1474	1629334	Caedimonas varicaedens
Echor24_bacteria.out	0.21029	1468	2219161	Crocinitomix sp. SM1701
Echor24_bacteria.out	0.207282	1447	1913988	Alphaproteobacteria bacterium
Echor24_bacteria.out	0.203557	1421	2026739	Euryarchaeota archaeon
Echor24_bacteria.out	0.203271	1419	1913989	Gammaproteobacteria bacterium
Echor24_bacteria.out	0.201552	1407	2026799	Verrucomicrobia bacterium
Echor24_bacteria.out	0.194532	1358	584	Proteus mirabilis
Echor24_bacteria.out	0.191238	1335	1309	Streptococcus mutans
Echor24_bacteria.out	0.190808	1332	75922	Mycolicibacterium tusciae
Echor24_bacteria.out	0.190808	1332	1883427	Actinobacteria bacterium
Echor24_bacteria.out	0.186224	1300	1869227	bacterium
Echor24_bacteria.out	0.178202	1244	655186	uncultured SUP05 cluster bacterium
Echor24_bacteria.out	0.17061	1191	83554	Chlamydia psittaci
Echor24_bacteria.out	0.159723	1115	796379	Kangiella spongicola
Echor24_bacteria.out	0.156285	1091	238013	Lactobacillus rennini
Echor24_bacteria.out	0.148836	1039	197	Campylobacter jejuni
Echor24_bacteria.out	0.142103	992	2059725	Zobellella maritima
Echor24_bacteria.out	0.140384	980	470934	Pantoea vagans
Echor24_bacteria.out	0.131216	916	158836	Enterobacter hormaechei
Echor24_bacteria.out	0.126919	886	1909294	Rhizobiales bacterium
Echor24_bacteria.out	0.126059	880	106	Runella slithyformis
Echor24_bacteria.out	0.116175	811	60520	Lactobacillus paraplantarum
Echor24_bacteria.out	0.115889	809	56	Sorangium cellulosum
Echor24_bacteria.out	0.10758	751	2250277	Thermoprotei archaeon
Echor24_bacteria.out	0.104285	728	2053489	Candidatus Lokiarchaeota archaeon
Echor24_bacteria.out	0.10271	717	28901	Salmonella enterica
Echor24_bacteria.out	0.10271	717	2607660	Nocardioides sp. BN130099
Echor24_bacteria.out	0.10228	714	2044944	Sphingobacteriales bacterium
Echor24_bacteria.out	1.95378	13639	10239	Viruses
Echor24_bacteria.out	24.0014	167550	NA	cannot be assigned to a (non-viral) species
Echor24_bacteria.out	43.9202	306600	NA	belong to a (non-viral) species with less than 0.1% of all reads
Echor24_bacteria.out	97.3527	25671431	NA	unclassified
Echor25_bacteria.out	6.4775	51564	1906665	archaeon
Echor25_bacteria.out	1.85642	14778	470	Acinetobacter baumannii
Echor25_bacteria.out	1.17091	9321	1973976	Deltaproteobacteria bacterium CG11_big_fil_rev_8_21_14_0_20_49_13
Echor25_bacteria.out	0.886127	7054	573	Klebsiella pneumoniae
Echor25_bacteria.out	0.824573	6564	1027	Microscilla marina
Echor25_bacteria.out	0.785003	6249	573658	Candidatus Hodgkinia cicadicola
Echor25_bacteria.out	0.677095	5390	1352	Enterococcus faecium
Echor25_bacteria.out	0.675211	5375	562	Escherichia coli
Echor25_bacteria.out	0.61529	4898	2026724	Chloroflexi bacterium
Echor25_bacteria.out	0.600592	4781	670	Vibrio parahaemolyticus
Echor25_bacteria.out	0.580618	4622	1978231	Acidobacteria bacterium
Echor25_bacteria.out	0.530872	4226	2026735	Deltaproteobacteria bacterium
Echor25_bacteria.out	0.524089	4172	1280	Staphylococcus aureus
Echor25_bacteria.out	0.48477	3859	77133	uncultured bacterium
Echor25_bacteria.out	0.441179	3512	69966	Macrococcus caseolyticus
Echor25_bacteria.out	0.376736	2999	2026780	Planctomycetes bacterium
Echor25_bacteria.out	0.366561	2918	64969	Oceanospirillum multiglobuliferum
Echor25_bacteria.out	0.361787	2880	2604685	Nitriliruptoraceae bacterium ZYF776
Echor25_bacteria.out	0.35224	2804	86473	uncultured Gammaproteobacteria bacterium
Echor25_bacteria.out	0.34709	2763	1428	Bacillus thuringiensis
Echor25_bacteria.out	0.330005	2627	569860	Methylovirgula ligni
Echor25_bacteria.out	0.328498	2615	1891241	Betaproteobacteria bacterium
Echor25_bacteria.out	0.321463	2559	2497945	Thalassobius sp. ZQ172
Echor25_bacteria.out	0.318825	2538	210	Helicobacter pylori
Echor25_bacteria.out	0.299982	2388	553151	Pseudomonas pelagia
Echor25_bacteria.out	0.283526	2257	287	Pseudomonas aeruginosa
Echor25_bacteria.out	0.278501	2217	1396	Bacillus cereus
Echor25_bacteria.out	0.273978	2181	955	Wolbachia pipientis
Echor25_bacteria.out	0.26418	2103	33883	Microbacterium arborescens
Echor25_bacteria.out	0.262421	2089	1895707	Alphaproteobacteria bacterium 43-37
Echor25_bacteria.out	0.262421	2089	1898104	Bacteroidetes bacterium
Echor25_bacteria.out	0.228378	1818	813	Chlamydia trachomatis
Echor25_bacteria.out	0.226871	1806	2250255	Methanosarcinales archaeon
Echor25_bacteria.out	0.220213	1753	1913988	Alphaproteobacteria bacterium
Echor25_bacteria.out	0.220087	1752	1838287	Gammaproteobacteria bacterium 2W06
Echor25_bacteria.out	0.218454	1739	2026739	Euryarchaeota archaeon
Echor25_bacteria.out	0.217952	1735	2026799	Verrucomicrobia bacterium
Echor25_bacteria.out	0.217324	1730	1977087	Proteobacteria bacterium
Echor25_bacteria.out	0.215314	1714	1892852	Goodfellowiella sp. AN110305
Echor25_bacteria.out	0.211043	1680	1913989	Gammaproteobacteria bacterium
Echor25_bacteria.out	0.205892	1639	584	Proteus mirabilis
Echor25_bacteria.out	0.20539	1635	1550035	Streptomyces sp. NBRC 109706
Echor25_bacteria.out	0.204385	1627	1869227	bacterium
Echor25_bacteria.out	0.204259	1626	1870904	Shinella sp.
Echor25_bacteria.out	0.201872	1607	985762	Staphylococcus agnetis
Echor25_bacteria.out	0.200867	1599	948	Anaplasma phagocytophilum
Echor25_bacteria.out	0.196345	1563	75922	Mycolicibacterium tusciae
Echor25_bacteria.out	0.189561	1509	35779	Aster yellows phytoplasma
Echor25_bacteria.out	0.187552	1493	238013	Lactobacillus rennini
Echor25_bacteria.out	0.177502	1413	1883427	Actinobacteria bacterium
Echor25_bacteria.out	0.175869	1400	1309	Streptococcus mutans
Echor25_bacteria.out	0.170341	1356	2219161	Crocinitomix sp. SM1701
Echor25_bacteria.out	0.162176	1291	1629334	Caedimonas varicaedens
Echor25_bacteria.out	0.160669	1279	2059725	Zobellella maritima
Echor25_bacteria.out	0.153885	1225	470934	Pantoea vagans
Echor25_bacteria.out	0.15175	1208	655186	uncultured SUP05 cluster bacterium
Echor25_bacteria.out	0.148107	1179	796379	Kangiella spongicola
Echor25_bacteria.out	0.141826	1129	106	Runella slithyformis
Echor25_bacteria.out	0.139816	1113	158836	Enterobacter hormaechei
Echor25_bacteria.out	0.127631	1016	83554	Chlamydia psittaci
Echor25_bacteria.out	0.127254	1013	1909294	Rhizobiales bacterium
Echor25_bacteria.out	0.112305	894	2250277	Thermoprotei archaeon
Echor25_bacteria.out	0.109918	875	60520	Lactobacillus paraplantarum
Echor25_bacteria.out	0.109039	868	197	Campylobacter jejuni
Echor25_bacteria.out	0.105898	843	2053489	Candidatus Lokiarchaeota archaeon
Echor25_bacteria.out	0.105773	842	28901	Salmonella enterica
Echor25_bacteria.out	0.10326	822	1773	Mycobacterium tuberculosis
Echor25_bacteria.out	0.103134	821	56	Sorangium cellulosum
Echor25_bacteria.out	2.02262	16101	10239	Viruses
Echor25_bacteria.out	23.6458	188232	NA	cannot be assigned to a (non-viral) species
Echor25_bacteria.out	45.8152	364711	NA	belong to a (non-viral) species with less than 0.1% of all reads
Echor25_bacteria.out	97.544	31616232	NA	unclassified
Echor26_bacteria.out	5.12537	12988	1906665	archaeon
Echor26_bacteria.out	3.35351	8498	1973976	Deltaproteobacteria bacterium CG11_big_fil_rev_8_21_14_0_20_49_13
Echor26_bacteria.out	1.86499	4726	470	Acinetobacter baumannii
Echor26_bacteria.out	1.84723	4681	573658	Candidatus Hodgkinia cicadicola
Echor26_bacteria.out	1.80185	4566	1280	Staphylococcus aureus
Echor26_bacteria.out	1.07101	2714	86473	uncultured Gammaproteobacteria bacterium
Echor26_bacteria.out	1.02089	2587	569860	Methylovirgula ligni
Echor26_bacteria.out	0.904872	2293	1891241	Betaproteobacteria bacterium
Echor26_bacteria.out	0.817266	2071	955	Wolbachia pipientis
Echor26_bacteria.out	0.799902	2027	2026724	Chloroflexi bacterium
Echor26_bacteria.out	0.737552	1869	573	Klebsiella pneumoniae
Echor26_bacteria.out	0.737552	1869	2497945	Thalassobius sp. ZQ172
Echor26_bacteria.out	0.688224	1744	1895707	Alphaproteobacteria bacterium 43-37
Echor26_bacteria.out	0.653497	1656	1027	Microscilla marina
Echor26_bacteria.out	0.645604	1636	562	Escherichia coli
Echor26_bacteria.out	0.635344	1610	1870904	Shinella sp.
Echor26_bacteria.out	0.587595	1489	1550035	Streptomyces sp. NBRC 109706
Echor26_bacteria.out	0.562339	1425	1352	Enterococcus faecium
Echor26_bacteria.out	0.533926	1353	35779	Aster yellows phytoplasma
Echor26_bacteria.out	0.484203	1227	670	Vibrio parahaemolyticus
Echor26_bacteria.out	0.468813	1188	1629334	Caedimonas varicaedens
Echor26_bacteria.out	0.468418	1187	1978231	Acidobacteria bacterium
Echor26_bacteria.out	0.42501	1077	2026735	Deltaproteobacteria bacterium
Echor26_bacteria.out	0.38752	982	77133	uncultured bacterium
Echor26_bacteria.out	0.352004	892	69966	Macrococcus caseolyticus
Echor26_bacteria.out	0.347663	881	1428	Bacillus thuringiensis
Echor26_bacteria.out	0.326748	828	2026780	Planctomycetes bacterium
Echor26_bacteria.out	0.299914	760	64969	Oceanospirillum multiglobuliferum
Echor26_bacteria.out	0.286891	727	2604685	Nitriliruptoraceae bacterium ZYF776
Echor26_bacteria.out	0.267555	678	553151	Pseudomonas pelagia
Echor26_bacteria.out	0.265976	674	1510197	Streptomyces sp. PT12
Echor26_bacteria.out	0.258084	654	197	Campylobacter jejuni
Echor26_bacteria.out	0.258084	654	813	Chlamydia trachomatis
Echor26_bacteria.out	0.250191	634	1977087	Proteobacteria bacterium
Echor26_bacteria.out	0.24151	612	489	Neisseria polysaccharea
Echor26_bacteria.out	0.235985	598	33883	Microbacterium arborescens
Echor26_bacteria.out	0.226514	574	287	Pseudomonas aeruginosa
Echor26_bacteria.out	0.217043	550	1396	Bacillus cereus
Echor26_bacteria.out	0.216254	548	1898104	Bacteroidetes bacterium
Echor26_bacteria.out	0.215859	547	210	Helicobacter pylori
Echor26_bacteria.out	0.180738	458	2250255	Methanosarcinales archaeon
Echor26_bacteria.out	0.176397	447	1913989	Gammaproteobacteria bacterium
Echor26_bacteria.out	0.175213	444	1838287	Gammaproteobacteria bacterium 2W06
Echor26_bacteria.out	0.172451	437	1892852	Goodfellowiella sp. AN110305
Echor26_bacteria.out	0.169688	430	985762	Staphylococcus agnetis
Echor26_bacteria.out	0.169294	429	1913988	Alphaproteobacteria bacterium
Echor26_bacteria.out	0.16219	411	948	Anaplasma phagocytophilum
Echor26_bacteria.out	0.157849	400	2026739	Euryarchaeota archaeon
Echor26_bacteria.out	0.156271	396	2219161	Crocinitomix sp. SM1701
Echor26_bacteria.out	0.155876	395	2026799	Verrucomicrobia bacterium
Echor26_bacteria.out	0.155087	393	1869227	bacterium
Echor26_bacteria.out	0.143248	363	1408192	Tatumella sp. UCD-D_suzukii
Echor26_bacteria.out	0.142065	360	470934	Pantoea vagans
Echor26_bacteria.out	0.14167	359	1883427	Actinobacteria bacterium
Echor26_bacteria.out	0.140881	357	75922	Mycolicibacterium tusciae
Echor26_bacteria.out	0.140881	357	238013	Lactobacillus rennini
Echor26_bacteria.out	0.135751	344	584	Proteus mirabilis
Echor26_bacteria.out	0.133777	339	796379	Kangiella spongicola
Echor26_bacteria.out	0.122728	311	655186	uncultured SUP05 cluster bacterium
Echor26_bacteria.out	0.120755	306	1309	Streptococcus mutans
Echor26_bacteria.out	0.119176	302	573499	Frankia sp. Ea1.12
Echor26_bacteria.out	0.116809	296	1773	Mycobacterium tuberculosis
Echor26_bacteria.out	0.113257	287	106	Runella slithyformis
Echor26_bacteria.out	0.108916	276	2059725	Zobellella maritima
Echor26_bacteria.out	0.104181	264	1909294	Rhizobiales bacterium
Echor26_bacteria.out	0.102208	259	83554	Chlamydia psittaci
Echor26_bacteria.out	0.101418	257	158836	Enterobacter hormaechei
Echor26_bacteria.out	1.66729	4225	10239	Viruses
Echor26_bacteria.out	25.4848	64580	NA	cannot be assigned to a (non-viral) species
Echor26_bacteria.out	38.1404	96650	NA	belong to a (non-viral) species with less than 0.1% of all reads
Echor26_bacteria.out	97.2442	8941857	NA	unclassified
Echor27_bacteria.out	5.99791	42184	1906665	archaeon
Echor27_bacteria.out	1.91366	13459	470	Acinetobacter baumannii
Echor27_bacteria.out	1.85863	13072	1973976	Deltaproteobacteria bacterium CG11_big_fil_rev_8_21_14_0_20_49_13
Echor27_bacteria.out	1.07534	7563	573658	Candidatus Hodgkinia cicadicola
Echor27_bacteria.out	0.861353	6058	573	Klebsiella pneumoniae
Echor27_bacteria.out	0.841732	5920	1280	Staphylococcus aureus
Echor27_bacteria.out	0.743767	5231	1027	Microscilla marina
Echor27_bacteria.out	0.711064	5001	2026724	Chloroflexi bacterium
Echor27_bacteria.out	0.705235	4960	562	Escherichia coli
Echor27_bacteria.out	0.638692	4492	1352	Enterococcus faecium
Echor27_bacteria.out	0.540869	3804	1978231	Acidobacteria bacterium
Echor27_bacteria.out	0.533618	3753	670	Vibrio parahaemolyticus
Echor27_bacteria.out	0.486129	3419	86473	uncultured Gammaproteobacteria bacterium
Echor27_bacteria.out	0.485702	3416	2026735	Deltaproteobacteria bacterium
Echor27_bacteria.out	0.459824	3234	77133	uncultured bacterium
Echor27_bacteria.out	0.441625	3106	1891241	Betaproteobacteria bacterium
Echor27_bacteria.out	0.427548	3007	569860	Methylovirgula ligni
Echor27_bacteria.out	0.407643	2867	2497945	Thalassobius sp. ZQ172
Echor27_bacteria.out	0.405794	2854	955	Wolbachia pipientis
Echor27_bacteria.out	0.396268	2787	69966	Macrococcus caseolyticus
Echor27_bacteria.out	0.376931	2651	2026780	Planctomycetes bacterium
Echor27_bacteria.out	0.368969	2595	1895707	Alphaproteobacteria bacterium 43-37
Echor27_bacteria.out	0.352333	2478	1428	Bacillus thuringiensis
Echor27_bacteria.out	0.348921	2454	35779	Aster yellows phytoplasma
Echor27_bacteria.out	0.347499	2444	64969	Oceanospirillum multiglobuliferum
Echor27_bacteria.out	0.339394	2387	2604685	Nitriliruptoraceae bacterium ZYF776
Echor27_bacteria.out	0.303279	2133	1550035	Streptomyces sp. NBRC 109706
Echor27_bacteria.out	0.277828	1954	210	Helicobacter pylori
Echor27_bacteria.out	0.268302	1887	33883	Microbacterium arborescens
Echor27_bacteria.out	0.264179	1858	553151	Pseudomonas pelagia
Echor27_bacteria.out	0.259344	1824	1396	Bacillus cereus
Echor27_bacteria.out	0.258349	1817	287	Pseudomonas aeruginosa
Echor27_bacteria.out	0.251951	1772	1870904	Shinella sp.
Echor27_bacteria.out	0.243278	1711	1898104	Bacteroidetes bacterium
Echor27_bacteria.out	0.235742	1658	813	Chlamydia trachomatis
Echor27_bacteria.out	0.231334	1627	985762	Staphylococcus agnetis
Echor27_bacteria.out	0.220528	1551	1977087	Proteobacteria bacterium
Echor27_bacteria.out	0.20958	1474	1838287	Gammaproteobacteria bacterium 2W06
Echor27_bacteria.out	0.209438	1473	2026739	Euryarchaeota archaeon
Echor27_bacteria.out	0.209011	1470	2250255	Methanosarcinales archaeon
Echor27_bacteria.out	0.207589	1460	1913989	Gammaproteobacteria bacterium
Echor27_bacteria.out	0.206167	1450	1629334	Caedimonas varicaedens
Echor27_bacteria.out	0.199343	1402	948	Anaplasma phagocytophilum
Echor27_bacteria.out	0.197636	1390	1913988	Alphaproteobacteria bacterium
Echor27_bacteria.out	0.196499	1382	1869227	bacterium
Echor27_bacteria.out	0.196499	1382	2026799	Verrucomicrobia bacterium
Echor27_bacteria.out	0.196357	1381	1892852	Goodfellowiella sp. AN110305
Echor27_bacteria.out	0.187826	1321	584	Proteus mirabilis
Echor27_bacteria.out	0.182707	1285	75922	Mycolicibacterium tusciae
Echor27_bacteria.out	0.18228	1282	1883427	Actinobacteria bacterium
Echor27_bacteria.out	0.178441	1255	2219161	Crocinitomix sp. SM1701
Echor27_bacteria.out	0.166356	1170	1309	Streptococcus mutans
Echor27_bacteria.out	0.165503	1164	238013	Lactobacillus rennini
Echor27_bacteria.out	0.164934	1160	197	Campylobacter jejuni
Echor27_bacteria.out	0.157398	1107	796379	Kangiella spongicola
Echor27_bacteria.out	0.147303	1036	470934	Pantoea vagans
Echor27_bacteria.out	0.147019	1034	655186	uncultured SUP05 cluster bacterium
Echor27_bacteria.out	0.144033	1013	489	Neisseria polysaccharea
Echor27_bacteria.out	0.136924	963	2059725	Zobellella maritima
Echor27_bacteria.out	0.133511	939	106	Runella slithyformis
Echor27_bacteria.out	0.12825	902	1909294	Rhizobiales bacterium
Echor27_bacteria.out	0.127966	900	1510197	Streptomyces sp. PT12
Echor27_bacteria.out	0.122563	862	158836	Enterobacter hormaechei
Echor27_bacteria.out	0.119577	841	83554	Chlamydia psittaci
Echor27_bacteria.out	0.111757	786	28901	Salmonella enterica
Echor27_bacteria.out	0.110762	779	56	Sorangium cellulosum
Echor27_bacteria.out	0.105643	743	2053489	Candidatus Lokiarchaeota archaeon
Echor27_bacteria.out	0.104932	738	2250277	Thermoprotei archaeon
Echor27_bacteria.out	0.102657	722	1773	Mycobacterium tuberculosis
Echor27_bacteria.out	1.94096	13651	10239	Viruses
Echor27_bacteria.out	24.2261	170385	NA	cannot be assigned to a (non-viral) species
Echor27_bacteria.out	43.7959	308022	NA	belong to a (non-viral) species with less than 0.1% of all reads
Echor27_bacteria.out	97.3721	26059809	NA	unclassified
Echor28_bacteria.out	6.37222	42160	1906665	archaeon
Echor28_bacteria.out	1.84939	12236	470	Acinetobacter baumannii
Echor28_bacteria.out	1.22698	8118	1973976	Deltaproteobacteria bacterium CG11_big_fil_rev_8_21_14_0_20_49_13
Echor28_bacteria.out	0.892504	5905	573	Klebsiella pneumoniae
Echor28_bacteria.out	0.782471	5177	1027	Microscilla marina
Echor28_bacteria.out	0.760404	5031	573658	Candidatus Hodgkinia cicadicola
Echor28_bacteria.out	0.707353	4680	562	Escherichia coli
Echor28_bacteria.out	0.662312	4382	1352	Enterococcus faecium
Echor28_bacteria.out	0.628002	4155	2026724	Chloroflexi bacterium
Echor28_bacteria.out	0.58538	3873	670	Vibrio parahaemolyticus
Echor28_bacteria.out	0.58281	3856	1978231	Acidobacteria bacterium
Echor28_bacteria.out	0.542606	3590	1280	Staphylococcus aureus
Echor28_bacteria.out	0.513586	3398	2026735	Deltaproteobacteria bacterium
Echor28_bacteria.out	0.495147	3276	77133	uncultured bacterium
Echor28_bacteria.out	0.431969	2858	69966	Macrococcus caseolyticus
Echor28_bacteria.out	0.399775	2645	2026780	Planctomycetes bacterium
Echor28_bacteria.out	0.373174	2469	64969	Oceanospirillum multiglobuliferum
Echor28_bacteria.out	0.372267	2463	1428	Bacillus thuringiensis
Echor28_bacteria.out	0.349293	2311	2604685	Nitriliruptoraceae bacterium ZYF776
Echor28_bacteria.out	0.320273	2119	569860	Methylovirgula ligni
Echor28_bacteria.out	0.317251	2099	1891241	Betaproteobacteria bacterium
Echor28_bacteria.out	0.31589	2090	86473	uncultured Gammaproteobacteria bacterium
Echor28_bacteria.out	0.298358	1974	2497945	Thalassobius sp. ZQ172
Echor28_bacteria.out	0.298207	1973	210	Helicobacter pylori
Echor28_bacteria.out	0.297602	1969	287	Pseudomonas aeruginosa
Echor28_bacteria.out	0.289138	1913	955	Wolbachia pipientis
Echor28_bacteria.out	0.288382	1908	553151	Pseudomonas pelagia
Echor28_bacteria.out	0.281732	1864	1396	Bacillus cereus
Echor28_bacteria.out	0.275233	1821	33883	Microbacterium arborescens
Echor28_bacteria.out	0.253166	1675	1898104	Bacteroidetes bacterium
Echor28_bacteria.out	0.239109	1582	813	Chlamydia trachomatis
Echor28_bacteria.out	0.234726	1553	1895707	Alphaproteobacteria bacterium 43-37
Echor28_bacteria.out	0.233215	1543	1838287	Gammaproteobacteria bacterium 2W06
Echor28_bacteria.out	0.223844	1481	1913989	Gammaproteobacteria bacterium
Echor28_bacteria.out	0.22067	1460	35779	Aster yellows phytoplasma
Echor28_bacteria.out	0.220368	1458	1977087	Proteobacteria bacterium
Echor28_bacteria.out	0.211299	1398	584	Proteus mirabilis
Echor28_bacteria.out	0.21009	1390	1550035	Streptomyces sp. NBRC 109706
Echor28_bacteria.out	0.207671	1374	2250255	Methanosarcinales archaeon
Echor28_bacteria.out	0.2048	1355	1913988	Alphaproteobacteria bacterium
Echor28_bacteria.out	0.200719	1328	2026799	Verrucomicrobia bacterium
Echor28_bacteria.out	0.199963	1323	985762	Staphylococcus agnetis
Echor28_bacteria.out	0.196487	1300	2026739	Euryarchaeota archaeon
Echor28_bacteria.out	0.19558	1294	75922	Mycolicibacterium tusciae
Echor28_bacteria.out	0.193313	1279	948	Anaplasma phagocytophilum
Echor28_bacteria.out	0.192859	1276	1883427	Actinobacteria bacterium
Echor28_bacteria.out	0.191348	1266	1869227	bacterium
Echor28_bacteria.out	0.191348	1266	1892852	Goodfellowiella sp. AN110305
Echor28_bacteria.out	0.169886	1124	238013	Lactobacillus rennini
Echor28_bacteria.out	0.167618	1109	1870904	Shinella sp.
Echor28_bacteria.out	0.165805	1097	1309	Streptococcus mutans
Echor28_bacteria.out	0.165351	1094	2219161	Crocinitomix sp. SM1701
Echor28_bacteria.out	0.157945	1045	796379	Kangiella spongicola
Echor28_bacteria.out	0.155225	1027	655186	uncultured SUP05 cluster bacterium
Echor28_bacteria.out	0.155073	1026	2059725	Zobellella maritima
Echor28_bacteria.out	0.152957	1012	1629334	Caedimonas varicaedens
Echor28_bacteria.out	0.151597	1003	470934	Pantoea vagans
Echor28_bacteria.out	0.139052	920	106	Runella slithyformis
Echor28_bacteria.out	0.134216	888	1909294	Rhizobiales bacterium
Echor28_bacteria.out	0.133006	880	158836	Enterobacter hormaechei
Echor28_bacteria.out	0.12152	804	197	Campylobacter jejuni
Echor28_bacteria.out	0.119101	788	83554	Chlamydia psittaci
Echor28_bacteria.out	0.117892	780	56	Sorangium cellulosum
Echor28_bacteria.out	0.11623	769	2250277	Thermoprotei archaeon
Echor28_bacteria.out	0.110486	731	2053489	Candidatus Lokiarchaeota archaeon
Echor28_bacteria.out	0.104894	694	28901	Salmonella enterica
Echor28_bacteria.out	0.102022	675	1638099	Salinarimonas sp. BN140002
Echor28_bacteria.out	2.06961	13693	10239	Viruses
Echor28_bacteria.out	23.8419	157743	NA	cannot be assigned to a (non-viral) species
Echor28_bacteria.out	45.9184	303806	NA	belong to a (non-viral) species with less than 0.1% of all reads
Echor28_bacteria.out	97.477	25561733	NA	unclassified
Echor29_bacteria.out	5.7719	39034	1906665	archaeon
Echor29_bacteria.out	2.352	15906	1973976	Deltaproteobacteria bacterium CG11_big_fil_rev_8_21_14_0_20_49_13
Echor29_bacteria.out	1.88828	12770	470	Acinetobacter baumannii
Echor29_bacteria.out	1.20173	8127	573658	Candidatus Hodgkinia cicadicola
Echor29_bacteria.out	0.822741	5564	573	Klebsiella pneumoniae
Echor29_bacteria.out	0.768473	5197	1280	Staphylococcus aureus
Echor29_bacteria.out	0.739491	5001	2026724	Chloroflexi bacterium
Echor29_bacteria.out	0.715832	4841	1027	Microscilla marina
Echor29_bacteria.out	0.678273	4587	562	Escherichia coli
Echor29_bacteria.out	0.629477	4257	1352	Enterococcus faecium
Echor29_bacteria.out	0.572104	3869	86473	uncultured Gammaproteobacteria bacterium
Echor29_bacteria.out	0.557317	3769	955	Wolbachia pipientis
Echor29_bacteria.out	0.546079	3693	1978231	Acidobacteria bacterium
Echor29_bacteria.out	0.541939	3665	569860	Methylovirgula ligni
Echor29_bacteria.out	0.532031	3598	670	Vibrio parahaemolyticus
Echor29_bacteria.out	0.510738	3454	2026735	Deltaproteobacteria bacterium
Echor29_bacteria.out	0.499796	3380	1891241	Betaproteobacteria bacterium
Echor29_bacteria.out	0.476433	3222	2497945	Thalassobius sp. ZQ172
Echor29_bacteria.out	0.456914	3090	77133	uncultured bacterium
Echor29_bacteria.out	0.415954	2813	1895707	Alphaproteobacteria bacterium 43-37
Echor29_bacteria.out	0.41418	2801	1550035	Streptomyces sp. NBRC 109706
Echor29_bacteria.out	0.40516	2740	69966	Macrococcus caseolyticus
Echor29_bacteria.out	0.40309	2726	35779	Aster yellows phytoplasma
Echor29_bacteria.out	0.355033	2401	2026780	Planctomycetes bacterium
Echor29_bacteria.out	0.333739	2257	1870904	Shinella sp.
Echor29_bacteria.out	0.325311	2200	1428	Bacillus thuringiensis
Echor29_bacteria.out	0.315995	2137	64969	Oceanospirillum multiglobuliferum
Echor29_bacteria.out	0.312003	2110	2604685	Nitriliruptoraceae bacterium ZYF776
Echor29_bacteria.out	0.285091	1928	985762	Staphylococcus agnetis
Echor29_bacteria.out	0.280063	1894	210	Helicobacter pylori
Echor29_bacteria.out	0.274296	1855	553151	Pseudomonas pelagia
Echor29_bacteria.out	0.259953	1758	287	Pseudomonas aeruginosa
Echor29_bacteria.out	0.259509	1755	33883	Microbacterium arborescens
Echor29_bacteria.out	0.253299	1713	1396	Bacillus cereus
Echor29_bacteria.out	0.244131	1651	1898104	Bacteroidetes bacterium
Echor29_bacteria.out	0.239104	1617	1629334	Caedimonas varicaedens
Echor29_bacteria.out	0.233337	1578	2219161	Crocinitomix sp. SM1701
Echor29_bacteria.out	0.224169	1516	813	Chlamydia trachomatis
Echor29_bacteria.out	0.221803	1500	1892852	Goodfellowiella sp. AN110305
Echor29_bacteria.out	0.219141	1482	1977087	Proteobacteria bacterium
Echor29_bacteria.out	0.21855	1478	948	Anaplasma phagocytophilum
Echor29_bacteria.out	0.213374	1443	1838287	Gammaproteobacteria bacterium 2W06
Echor29_bacteria.out	0.205094	1387	1309	Streptococcus mutans
Echor29_bacteria.out	0.201989	1366	2026739	Euryarchaeota archaeon
Echor29_bacteria.out	0.201101	1360	1913989	Gammaproteobacteria bacterium
Echor29_bacteria.out	0.195778	1324	584	Proteus mirabilis
Echor29_bacteria.out	0.194299	1314	2026799	Verrucomicrobia bacterium
Echor29_bacteria.out	0.190455	1288	1913988	Alphaproteobacteria bacterium
Echor29_bacteria.out	0.185279	1253	2250255	Methanosarcinales archaeon
Echor29_bacteria.out	0.184392	1247	1883427	Actinobacteria bacterium
Echor29_bacteria.out	0.183357	1240	1869227	bacterium
Echor29_bacteria.out	0.179513	1214	75922	Mycolicibacterium tusciae
Echor29_bacteria.out	0.177294	1199	197	Campylobacter jejuni
Echor29_bacteria.out	0.165613	1120	655186	uncultured SUP05 cluster bacterium
Echor29_bacteria.out	0.159994	1082	83554	Chlamydia psittaci
Echor29_bacteria.out	0.145946	987	796379	Kangiella spongicola
Echor29_bacteria.out	0.143433	970	238013	Lactobacillus rennini
Echor29_bacteria.out	0.131159	887	106	Runella slithyformis
Echor29_bacteria.out	0.127315	861	158836	Enterobacter hormaechei
Echor29_bacteria.out	0.126132	853	470934	Pantoea vagans
Echor29_bacteria.out	0.124505	842	1909294	Rhizobiales bacterium
Echor29_bacteria.out	0.122731	830	2059725	Zobellella maritima
Echor29_bacteria.out	0.11031	746	56	Sorangium cellulosum
Echor29_bacteria.out	0.108388	733	28901	Salmonella enterica
Echor29_bacteria.out	0.10617	718	2250277	Thermoprotei archaeon
Echor29_bacteria.out	0.10543	713	60520	Lactobacillus paraplantarum
Echor29_bacteria.out	1.79882	12165	10239	Viruses
Echor29_bacteria.out	24.6972	167021	NA	cannot be assigned to a (non-viral) species
Echor29_bacteria.out	42.7605	289179	NA	belong to a (non-viral) species with less than 0.1% of all reads
Echor29_bacteria.out	97.3465	24810026	NA	unclassified
Echor30_bacteria.out	5.80164	38868	1906665	archaeon
Echor30_bacteria.out	2.18868	14663	1973976	Deltaproteobacteria bacterium CG11_big_fil_rev_8_21_14_0_20_49_13
Echor30_bacteria.out	2.01001	13466	470	Acinetobacter baumannii
Echor30_bacteria.out	1.1577	7756	573658	Candidatus Hodgkinia cicadicola
Echor30_bacteria.out	0.889771	5961	1280	Staphylococcus aureus
Echor30_bacteria.out	0.833498	5584	573	Klebsiella pneumoniae
Echor30_bacteria.out	0.738565	4948	562	Escherichia coli
Echor30_bacteria.out	0.727668	4875	1027	Microscilla marina
Echor30_bacteria.out	0.705129	4724	2026724	Chloroflexi bacterium
Echor30_bacteria.out	0.610197	4088	1352	Enterococcus faecium
Echor30_bacteria.out	0.548252	3673	86473	uncultured Gammaproteobacteria bacterium
Echor30_bacteria.out	0.541385	3627	1978231	Acidobacteria bacterium
Echor30_bacteria.out	0.530041	3551	955	Wolbachia pipientis
Echor30_bacteria.out	0.525265	3519	569860	Methylovirgula ligni
Echor30_bacteria.out	0.52019	3485	670	Vibrio parahaemolyticus
Echor30_bacteria.out	0.48347	3239	2026735	Deltaproteobacteria bacterium
Echor30_bacteria.out	0.47332	3171	1891241	Betaproteobacteria bacterium
Echor30_bacteria.out	0.457647	3066	77133	uncultured bacterium
Echor30_bacteria.out	0.439437	2944	2497945	Thalassobius sp. ZQ172
Echor30_bacteria.out	0.410181	2748	69966	Macrococcus caseolyticus
Echor30_bacteria.out	0.391971	2626	1895707	Alphaproteobacteria bacterium 43-37
Echor30_bacteria.out	0.390478	2616	35779	Aster yellows phytoplasma
Echor30_bacteria.out	0.374208	2507	1550035	Streptomyces sp. NBRC 109706
Echor30_bacteria.out	0.359282	2407	2026780	Planctomycetes bacterium
Echor30_bacteria.out	0.341668	2289	1428	Bacillus thuringiensis
Echor30_bacteria.out	0.318831	2136	64969	Oceanospirillum multiglobuliferum
Echor30_bacteria.out	0.316442	2120	985762	Staphylococcus agnetis
Echor30_bacteria.out	0.311069	2084	1870904	Shinella sp.
Echor30_bacteria.out	0.306889	2056	2604685	Nitriliruptoraceae bacterium ZYF776
Echor30_bacteria.out	0.286589	1920	553151	Pseudomonas pelagia
Echor30_bacteria.out	0.284947	1909	210	Helicobacter pylori
Echor30_bacteria.out	0.273006	1829	287	Pseudomonas aeruginosa
Echor30_bacteria.out	0.267334	1791	33883	Microbacterium arborescens
Echor30_bacteria.out	0.253154	1696	2219161	Crocinitomix sp. SM1701
Echor30_bacteria.out	0.245691	1646	1898104	Bacteroidetes bacterium
Echor30_bacteria.out	0.244497	1638	1396	Bacillus cereus
Echor30_bacteria.out	0.234944	1574	948	Anaplasma phagocytophilum
Echor30_bacteria.out	0.232257	1556	1629334	Caedimonas varicaedens
Echor30_bacteria.out	0.225241	1509	1309	Streptococcus mutans
Echor30_bacteria.out	0.217032	1454	1977087	Proteobacteria bacterium
Echor30_bacteria.out	0.216584	1451	813	Chlamydia trachomatis
Echor30_bacteria.out	0.204493	1370	2250255	Methanosarcinales archaeon
Echor30_bacteria.out	0.203299	1362	1913988	Alphaproteobacteria bacterium
Echor30_bacteria.out	0.201956	1353	2026799	Verrucomicrobia bacterium
Echor30_bacteria.out	0.201657	1351	1838287	Gammaproteobacteria bacterium 2W06
Echor30_bacteria.out	0.19912	1334	1892852	Goodfellowiella sp. AN110305
Echor30_bacteria.out	0.198523	1330	1869227	bacterium
Echor30_bacteria.out	0.189716	1271	584	Proteus mirabilis
Echor30_bacteria.out	0.186134	1247	1913989	Gammaproteobacteria bacterium
Echor30_bacteria.out	0.184641	1237	2026739	Euryarchaeota archaeon
Echor30_bacteria.out	0.184492	1236	1883427	Actinobacteria bacterium
Echor30_bacteria.out	0.179268	1201	197	Campylobacter jejuni
Echor30_bacteria.out	0.177775	1191	655186	uncultured SUP05 cluster bacterium
Echor30_bacteria.out	0.167177	1120	75922	Mycolicibacterium tusciae
Echor30_bacteria.out	0.163893	1098	83554	Chlamydia psittaci
Echor30_bacteria.out	0.151952	1018	796379	Kangiella spongicola
Echor30_bacteria.out	0.146131	979	238013	Lactobacillus rennini
Echor30_bacteria.out	0.129861	870	60520	Lactobacillus paraplantarum
Echor30_bacteria.out	0.129264	866	470934	Pantoea vagans
Echor30_bacteria.out	0.121203	812	106	Runella slithyformis
Echor30_bacteria.out	0.121203	812	158836	Enterobacter hormaechei
Echor30_bacteria.out	0.120009	804	2059725	Zobellella maritima
Echor30_bacteria.out	0.118815	796	1909294	Rhizobiales bacterium
Echor30_bacteria.out	0.111949	750	56	Sorangium cellulosum
Echor30_bacteria.out	0.108665	728	489	Neisseria polysaccharea
Echor30_bacteria.out	0.107919	723	1510197	Streptomyces sp. PT12
Echor30_bacteria.out	0.105232	705	2250277	Thermoprotei archaeon
Echor30_bacteria.out	0.10359	694	2528593	Clostridia bacterium k32
Echor30_bacteria.out	1.83044	12263	10239	Viruses
Echor30_bacteria.out	24.3708	163272	NA	cannot be assigned to a (non-viral) species
Echor30_bacteria.out	42.8966	287385	NA	belong to a (non-viral) species with less than 0.1% of all reads
Echor30_bacteria.out	97.3304	24425400	NA	unclassified
Echor31_bacteria.out	5.10271	36334	1906665	archaeon
Echor31_bacteria.out	1.7097	12174	470	Acinetobacter baumannii
Echor31_bacteria.out	0.837297	5962	1973976	Deltaproteobacteria bacterium CG11_big_fil_rev_8_21_14_0_20_49_13
Echor31_bacteria.out	0.757528	5394	573	Klebsiella pneumoniae
Echor31_bacteria.out	0.664838	4734	1027	Microscilla marina
Echor31_bacteria.out	0.623268	4438	562	Escherichia coli
Echor31_bacteria.out	0.583664	4156	573658	Candidatus Hodgkinia cicadicola
Echor31_bacteria.out	0.551083	3924	1352	Enterococcus faecium
Echor31_bacteria.out	0.508249	3619	2026724	Chloroflexi bacterium
Echor31_bacteria.out	0.497716	3544	1978231	Acidobacteria bacterium
Echor31_bacteria.out	0.476931	3396	670	Vibrio parahaemolyticus
Echor31_bacteria.out	0.451371	3214	536441	Chryseobacterium taklimakanense
Echor31_bacteria.out	0.421879	3004	77133	uncultured bacterium
Echor31_bacteria.out	0.420615	2995	2026735	Deltaproteobacteria bacterium
Echor31_bacteria.out	0.418508	2980	1002339	Psychrobacter sp. 1501(2011)
Echor31_bacteria.out	0.405307	2886	1502	Clostridium perfringens
Echor31_bacteria.out	0.371742	2647	69966	Macrococcus caseolyticus
Echor31_bacteria.out	0.328627	2340	1280	Staphylococcus aureus
Echor31_bacteria.out	0.328206	2337	540500	Psychrobacter lutiphocae
Echor31_bacteria.out	0.322588	2297	2026780	Planctomycetes bacterium
Echor31_bacteria.out	0.308123	2194	985762	Staphylococcus agnetis
Echor31_bacteria.out	0.295624	2105	2604685	Nitriliruptoraceae bacterium ZYF776
Echor31_bacteria.out	0.289023	2058	1975705	Psychrobacter sp. FDAARGOS_221
Echor31_bacteria.out	0.283968	2022	2488563	Psychrobacter pygoscelis
Echor31_bacteria.out	0.270064	1923	1428	Bacillus thuringiensis
Echor31_bacteria.out	0.26543	1890	210	Helicobacter pylori
Echor31_bacteria.out	0.262621	1870	1118202	Cruoricaptor ignavus
Echor31_bacteria.out	0.260093	1852	64969	Oceanospirillum multiglobuliferum
Echor31_bacteria.out	0.255459	1819	1891241	Betaproteobacteria bacterium
Echor31_bacteria.out	0.25279	1800	553151	Pseudomonas pelagia
Echor31_bacteria.out	0.244083	1738	33883	Microbacterium arborescens
Echor31_bacteria.out	0.243943	1737	569860	Methylovirgula ligni
Echor31_bacteria.out	0.23664	1685	86473	uncultured Gammaproteobacteria bacterium
Echor31_bacteria.out	0.235095	1674	1898104	Bacteroidetes bacterium
Echor31_bacteria.out	0.227511	1620	287	Pseudomonas aeruginosa
Echor31_bacteria.out	0.223017	1588	2219161	Crocinitomix sp. SM1701
Echor31_bacteria.out	0.222877	1587	1396	Bacillus cereus
Echor31_bacteria.out	0.222455	1584	2497945	Thalassobius sp. ZQ172
Echor31_bacteria.out	0.221332	1576	1871047	Chryseobacterium sp.
Echor31_bacteria.out	0.219085	1560	1913989	Gammaproteobacteria bacterium
Echor31_bacteria.out	0.215574	1535	29432	Psychrobacter phenylpyruvicus
Echor31_bacteria.out	0.215433	1534	955	Wolbachia pipientis
Echor31_bacteria.out	0.21122	1504	948	Anaplasma phagocytophilum
Echor31_bacteria.out	0.197738	1408	1892852	Goodfellowiella sp. AN110305
Echor31_bacteria.out	0.194929	1388	980427	Deinococcus wulumuqiensis
Echor31_bacteria.out	0.192823	1373	1945520	Psychrobacter pasteurii
Echor31_bacteria.out	0.189171	1347	1977087	Proteobacteria bacterium
Echor31_bacteria.out	0.189031	1346	1895707	Alphaproteobacteria bacterium 43-37
Echor31_bacteria.out	0.186784	1330	1838287	Gammaproteobacteria bacterium 2W06
Echor31_bacteria.out	0.18566	1322	1309	Streptococcus mutans
Echor31_bacteria.out	0.179762	1280	2026799	Verrucomicrobia bacterium
Echor31_bacteria.out	0.178919	1274	1913988	Alphaproteobacteria bacterium
Echor31_bacteria.out	0.176672	1258	813	Chlamydia trachomatis
Echor31_bacteria.out	0.174847	1245	584	Proteus mirabilis
Echor31_bacteria.out	0.173302	1234	1883427	Actinobacteria bacterium
Echor31_bacteria.out	0.171476	1221	2250255	Methanosarcinales archaeon
Echor31_bacteria.out	0.170352	1213	1869227	bacterium
Echor31_bacteria.out	0.16965	1208	655186	uncultured SUP05 cluster bacterium
Echor31_bacteria.out	0.164314	1170	1550035	Streptomyces sp. NBRC 109706
Echor31_bacteria.out	0.16305	1161	2026739	Euryarchaeota archaeon
Echor31_bacteria.out	0.155887	1110	75922	Mycolicibacterium tusciae
Echor31_bacteria.out	0.153781	1095	83554	Chlamydia psittaci
Echor31_bacteria.out	0.152236	1084	421525	Chryseobacterium haifense
Echor31_bacteria.out	0.151674	1080	35779	Aster yellows phytoplasma
Echor31_bacteria.out	0.14704	1047	34085	Riemerella anatipestifer
Echor31_bacteria.out	0.142686	1016	238013	Lactobacillus rennini
Echor31_bacteria.out	0.136928	975	1870904	Shinella sp.
Echor31_bacteria.out	0.135664	966	2602768	Chryseobacterium sp. legu1
Echor31_bacteria.out	0.134681	959	237258	Cloacibacterium normanense
Echor31_bacteria.out	0.128783	917	1299	Deinococcus radiodurans
Echor31_bacteria.out	0.128783	917	796379	Kangiella spongicola
Echor31_bacteria.out	0.128361	914	1945521	Psychrobacter piechaudii
Echor31_bacteria.out	0.12485	889	232216	Chryseobacterium koreense
Echor31_bacteria.out	0.119373	850	2059725	Zobellella maritima
Echor31_bacteria.out	0.119092	848	470934	Pantoea vagans
Echor31_bacteria.out	0.117547	837	60520	Lactobacillus paraplantarum
Echor31_bacteria.out	0.111509	794	106	Runella slithyformis
Echor31_bacteria.out	0.108278	771	1909294	Rhizobiales bacterium
Echor31_bacteria.out	0.106453	758	1629334	Caedimonas varicaedens
Echor31_bacteria.out	0.105189	749	158836	Enterobacter hormaechei
Echor31_bacteria.out	0.102801	732	493376	Chryseobacterium palustre
Echor31_bacteria.out	0.100133	713	2479858	Amniculibacterium aquaticum
Echor31_bacteria.out	1.70465	12138	10239	Viruses
Echor31_bacteria.out	26.568	189178	NA	cannot be assigned to a (non-viral) species
Echor31_bacteria.out	44.3939	316108	NA	belong to a (non-viral) species with less than 0.1% of all reads
Echor31_bacteria.out	96.8912	22192540	NA	unclassified
Echor32_bacteria.out	5.38915	67320	1906665	archaeon
Echor32_bacteria.out	1.69488	21172	470	Acinetobacter baumannii
Echor32_bacteria.out	0.785717	9815	573	Klebsiella pneumoniae
Echor32_bacteria.out	0.752576	9401	1502	Clostridium perfringens
Echor32_bacteria.out	0.66868	8353	1027	Microscilla marina
Echor32_bacteria.out	0.664197	8297	1002339	Psychrobacter sp. 1501(2011)
Echor32_bacteria.out	0.597033	7458	562	Escherichia coli
Echor32_bacteria.out	0.585505	7314	1973976	Deltaproteobacteria bacterium CG11_big_fil_rev_8_21_14_0_20_49_13
Echor32_bacteria.out	0.56213	7022	1352	Enterococcus faecium
Echor32_bacteria.out	0.505533	6315	1978231	Acidobacteria bacterium
Echor32_bacteria.out	0.480156	5998	670	Vibrio parahaemolyticus
Echor32_bacteria.out	0.476794	5956	2026724	Chloroflexi bacterium
Echor32_bacteria.out	0.451657	5642	573658	Candidatus Hodgkinia cicadicola
Echor32_bacteria.out	0.445733	5568	2026735	Deltaproteobacteria bacterium
Echor32_bacteria.out	0.442852	5532	77133	uncultured bacterium
Echor32_bacteria.out	0.397942	4971	536441	Chryseobacterium taklimakanense
Echor32_bacteria.out	0.372485	4653	69966	Macrococcus caseolyticus
Echor32_bacteria.out	0.347269	4338	540500	Psychrobacter lutiphocae
Echor32_bacteria.out	0.341825	4270	2026780	Planctomycetes bacterium
Echor32_bacteria.out	0.328536	4104	1945520	Psychrobacter pasteurii
Echor32_bacteria.out	0.312766	3907	29432	Psychrobacter phenylpyruvicus
Echor32_bacteria.out	0.296275	3701	2604685	Nitriliruptoraceae bacterium ZYF776
Echor32_bacteria.out	0.290031	3623	1280	Staphylococcus aureus
Echor32_bacteria.out	0.28883	3608	1975705	Psychrobacter sp. FDAARGOS_221
Echor32_bacteria.out	0.285228	3563	1428	Bacillus thuringiensis
Echor32_bacteria.out	0.284507	3554	29372	Clostridium thermobutyricum
Echor32_bacteria.out	0.2741	3424	210	Helicobacter pylori
Echor32_bacteria.out	0.267616	3343	985762	Staphylococcus agnetis
Echor32_bacteria.out	0.25865	3231	64969	Oceanospirillum multiglobuliferum
Echor32_bacteria.out	0.250965	3135	287	Pseudomonas aeruginosa
Echor32_bacteria.out	0.249444	3116	553151	Pseudomonas pelagia
Echor32_bacteria.out	0.245041	3061	33883	Microbacterium arborescens
Echor32_bacteria.out	0.239678	2994	1396	Bacillus cereus
Echor32_bacteria.out	0.237837	2971	1898104	Bacteroidetes bacterium
Echor32_bacteria.out	0.22735	2840	2488563	Psychrobacter pygoscelis
Echor32_bacteria.out	0.222386	2778	2219161	Crocinitomix sp. SM1701
Echor32_bacteria.out	0.222066	2774	1118202	Cruoricaptor ignavus
Echor32_bacteria.out	0.221346	2765	1913989	Gammaproteobacteria bacterium
Echor32_bacteria.out	0.209978	2623	1945521	Psychrobacter piechaudii
Echor32_bacteria.out	0.205495	2567	1892852	Goodfellowiella sp. AN110305
Echor32_bacteria.out	0.201893	2522	584	Proteus mirabilis
Echor32_bacteria.out	0.19749	2467	1891241	Betaproteobacteria bacterium
Echor32_bacteria.out	0.19717	2463	1871047	Chryseobacterium sp.
Echor32_bacteria.out	0.193007	2411	1838287	Gammaproteobacteria bacterium 2W06
Echor32_bacteria.out	0.192367	2403	2026799	Verrucomicrobia bacterium
Echor32_bacteria.out	0.191966	2398	1309	Streptococcus mutans
Echor32_bacteria.out	0.191246	2389	569860	Methylovirgula ligni
Echor32_bacteria.out	0.189004	2361	948	Anaplasma phagocytophilum
Echor32_bacteria.out	0.186443	2329	1977087	Proteobacteria bacterium
Echor32_bacteria.out	0.184281	2302	2026739	Euryarchaeota archaeon
Echor32_bacteria.out	0.177637	2219	1913988	Alphaproteobacteria bacterium
Echor32_bacteria.out	0.176276	2202	1869227	bacterium
Echor32_bacteria.out	0.175075	2187	813	Chlamydia trachomatis
Echor32_bacteria.out	0.174515	2180	2497945	Thalassobius sp. ZQ172
Echor32_bacteria.out	0.174195	2176	75922	Mycolicibacterium tusciae
Echor32_bacteria.out	0.173714	2170	86473	uncultured Gammaproteobacteria bacterium
Echor32_bacteria.out	0.173394	2166	2250255	Methanosarcinales archaeon
Echor32_bacteria.out	0.163147	2038	1883427	Actinobacteria bacterium
Echor32_bacteria.out	0.159385	1991	955	Wolbachia pipientis
Echor32_bacteria.out	0.158424	1979	655186	uncultured SUP05 cluster bacterium
Echor32_bacteria.out	0.142734	1783	238013	Lactobacillus rennini
Echor32_bacteria.out	0.139132	1738	34085	Riemerella anatipestifer
Echor32_bacteria.out	0.135289	1690	83554	Chlamydia psittaci
Echor32_bacteria.out	0.134489	1680	421525	Chryseobacterium haifense
Echor32_bacteria.out	0.133288	1665	1895707	Alphaproteobacteria bacterium 43-37
Echor32_bacteria.out	0.133208	1664	796379	Kangiella spongicola
Echor32_bacteria.out	0.130966	1636	2059725	Zobellella maritima
Echor32_bacteria.out	0.126964	1586	106	Runella slithyformis
Echor32_bacteria.out	0.126884	1585	2602768	Chryseobacterium sp. legu1
Echor32_bacteria.out	0.125843	1572	1550035	Streptomyces sp. NBRC 109706
Echor32_bacteria.out	0.12128	1515	237258	Cloacibacterium normanense
Echor32_bacteria.out	0.114876	1435	60520	Lactobacillus paraplantarum
Echor32_bacteria.out	0.112074	1400	470934	Pantoea vagans
Echor32_bacteria.out	0.10679	1334	35779	Aster yellows phytoplasma
Echor32_bacteria.out	0.104869	1310	158836	Enterobacter hormaechei
Echor32_bacteria.out	0.103188	1289	1909294	Rhizobiales bacterium
Echor32_bacteria.out	0.102387	1279	56	Sorangium cellulosum
Echor32_bacteria.out	0.101267	1265	232216	Chryseobacterium koreense
Echor32_bacteria.out	1.72826	21589	10239	Viruses
Echor32_bacteria.out	26.0897	325906	NA	cannot be assigned to a (non-viral) species
Echor32_bacteria.out	44.9757	561826	NA	belong to a (non-viral) species with less than 0.1% of all reads
Echor32_bacteria.out	96.9608	39853589	NA	unclassified
Echor33_bacteria.out	5.41606	54513	1906665	archaeon
Echor33_bacteria.out	1.48404	14937	470	Acinetobacter baumannii
Echor33_bacteria.out	0.799597	8048	1027	Microscilla marina
Echor33_bacteria.out	0.772672	7777	573	Klebsiella pneumoniae
Echor33_bacteria.out	0.59016	5940	536441	Chryseobacterium taklimakanense
Echor33_bacteria.out	0.552902	5565	1352	Enterococcus faecium
Echor33_bacteria.out	0.525183	5286	670	Vibrio parahaemolyticus
Echor33_bacteria.out	0.521507	5249	562	Escherichia coli
Echor33_bacteria.out	0.503126	5064	1978231	Acidobacteria bacterium
Echor33_bacteria.out	0.452754	4557	77133	uncultured bacterium
Echor33_bacteria.out	0.431691	4345	2026735	Deltaproteobacteria bacterium
Echor33_bacteria.out	0.413907	4166	2026724	Chloroflexi bacterium
Echor33_bacteria.out	0.397712	4003	540500	Psychrobacter lutiphocae
Echor33_bacteria.out	0.385094	3876	1002339	Psychrobacter sp. 1501(2011)
Echor33_bacteria.out	0.380027	3825	2488563	Psychrobacter pygoscelis
Echor33_bacteria.out	0.361547	3639	64969	Oceanospirillum multiglobuliferum
Echor33_bacteria.out	0.360455	3628	2026780	Planctomycetes bacterium
Echor33_bacteria.out	0.35658	3589	1975705	Psychrobacter sp. FDAARGOS_221
Echor33_bacteria.out	0.346843	3491	69966	Macrococcus caseolyticus
Echor33_bacteria.out	0.340783	3430	1118202	Cruoricaptor ignavus
Echor33_bacteria.out	0.307598	3096	2604685	Nitriliruptoraceae bacterium ZYF776
Echor33_bacteria.out	0.287827	2897	210	Helicobacter pylori
Echor33_bacteria.out	0.272924	2747	1428	Bacillus thuringiensis
Echor33_bacteria.out	0.271036	2728	1871047	Chryseobacterium sp.
Echor33_bacteria.out	0.26428	2660	1898104	Bacteroidetes bacterium
Echor33_bacteria.out	0.252457	2541	553151	Pseudomonas pelagia
Echor33_bacteria.out	0.247092	2487	1396	Bacillus cereus
Echor33_bacteria.out	0.242721	2443	287	Pseudomonas aeruginosa
Echor33_bacteria.out	0.241032	2426	1913989	Gammaproteobacteria bacterium
Echor33_bacteria.out	0.233779	2353	33883	Microbacterium arborescens
Echor33_bacteria.out	0.232288	2338	573658	Candidatus Hodgkinia cicadicola
Echor33_bacteria.out	0.213709	2151	29432	Psychrobacter phenylpyruvicus
Echor33_bacteria.out	0.199601	2009	34085	Riemerella anatipestifer
Echor33_bacteria.out	0.19831	1996	75922	Mycolicibacterium tusciae
Echor33_bacteria.out	0.196422	1977	584	Proteus mirabilis
Echor33_bacteria.out	0.196323	1976	1838287	Gammaproteobacteria bacterium 2W06
Echor33_bacteria.out	0.193541	1948	2250255	Methanosarcinales archaeon
Echor33_bacteria.out	0.189368	1906	1977087	Proteobacteria bacterium
Echor33_bacteria.out	0.186785	1880	421525	Chryseobacterium haifense
Echor33_bacteria.out	0.183506	1847	1869227	bacterium
Echor33_bacteria.out	0.18291	1841	2026739	Euryarchaeota archaeon
Echor33_bacteria.out	0.180327	1815	2026799	Verrucomicrobia bacterium
Echor33_bacteria.out	0.179432	1806	2602768	Chryseobacterium sp. legu1
Echor33_bacteria.out	0.174465	1756	237258	Cloacibacterium normanense
Echor33_bacteria.out	0.174067	1752	1913988	Alphaproteobacteria bacterium
Echor33_bacteria.out	0.172875	1740	1892852	Goodfellowiella sp. AN110305
Echor33_bacteria.out	0.169497	1706	238013	Lactobacillus rennini
Echor33_bacteria.out	0.168305	1694	1973976	Deltaproteobacteria bacterium CG11_big_fil_rev_8_21_14_0_20_49_13
Echor33_bacteria.out	0.167113	1682	813	Chlamydia trachomatis
Echor33_bacteria.out	0.158767	1598	1883427	Actinobacteria bacterium
Echor33_bacteria.out	0.158668	1597	232216	Chryseobacterium koreense
Echor33_bacteria.out	0.157277	1583	1945520	Psychrobacter pasteurii
Echor33_bacteria.out	0.153799	1548	2059725	Zobellella maritima
Echor33_bacteria.out	0.143765	1447	106	Runella slithyformis
Echor33_bacteria.out	0.143069	1440	796379	Kangiella spongicola
Echor33_bacteria.out	0.133829	1347	1280	Staphylococcus aureus
Echor33_bacteria.out	0.133034	1339	493376	Chryseobacterium palustre
Echor33_bacteria.out	0.125782	1266	655186	uncultured SUP05 cluster bacterium
Echor33_bacteria.out	0.124689	1255	512012	Flavobacteriaceae bacterium JJC
Echor33_bacteria.out	0.124391	1252	2479858	Amniculibacterium aquaticum
Echor33_bacteria.out	0.121509	1223	1895745	Chryseobacterium sp. 39-10
Echor33_bacteria.out	0.121311	1221	948	Anaplasma phagocytophilum
Echor33_bacteria.out	0.120317	1211	985762	Staphylococcus agnetis
Echor33_bacteria.out	0.117635	1184	470934	Pantoea vagans
Echor33_bacteria.out	0.117038	1178	531844	Flavobacteriaceae bacterium 3519-10
Echor33_bacteria.out	0.11674	1175	2039166	Chryseobacterium sp. 6424
Echor33_bacteria.out	0.112667	1134	2219161	Crocinitomix sp. SM1701
Echor33_bacteria.out	0.11217	1129	1909294	Rhizobiales bacterium
Echor33_bacteria.out	0.111276	1120	2010998	Chryseobacterium sp. VAUSW3
Echor33_bacteria.out	0.110879	1116	2497945	Thalassobius sp. ZQ172
Echor33_bacteria.out	0.110282	1110	1125876	Chryseobacterium frigidisoli
Echor33_bacteria.out	0.110084	1108	1309	Streptococcus mutans
Echor33_bacteria.out	0.106507	1072	619805	Soonwooa buanensis
Echor33_bacteria.out	0.103626	1043	493375	Chryseobacterium humi
Echor33_bacteria.out	0.102732	1034	158836	Enterobacter hormaechei
Echor33_bacteria.out	0.101241	1019	1945521	Psychrobacter piechaudii
Echor33_bacteria.out	0.100744	1014	2044944	Sphingobacteriales bacterium
Echor33_bacteria.out	1.70848	17196	10239	Viruses
Echor33_bacteria.out	26.8919	270669	NA	cannot be assigned to a (non-viral) species
Echor33_bacteria.out	46.3735	466753	NA	belong to a (non-viral) species with less than 0.1% of all reads
Echor33_bacteria.out	96.8607	31054739	NA	unclassified
Echor34_bacteria.out	2.59086	39723	400061	Paludibacterium yongneupense
Echor34_bacteria.out	2.40497	36873	1144873	Paludibacterium purpuratum
Echor34_bacteria.out	1.61258	24724	1906665	archaeon
Echor34_bacteria.out	0.769045	11791	2014876	Xenophilus sp. AP218F
Echor34_bacteria.out	0.685821	10515	990370	Pseudogulbenkiania sp. MAI-1
Echor34_bacteria.out	0.657253	10077	2290923	Crenobacter cavernae
Echor34_bacteria.out	0.63586	9749	540500	Psychrobacter lutiphocae
Echor34_bacteria.out	0.628489	9636	2488563	Psychrobacter pygoscelis
Echor34_bacteria.out	0.601291	9219	1002339	Psychrobacter sp. 1501(2011)
Echor34_bacteria.out	0.573963	8800	2059672	Chromobacterium sp. ATCC 53434
Echor34_bacteria.out	0.569723	8735	1975705	Psychrobacter sp. FDAARGOS_221
Echor34_bacteria.out	0.561571	8610	1452487	Crenobacter luteus
Echor34_bacteria.out	0.547352	8392	2563443	Crenobacter sp. GY 70310
Echor34_bacteria.out	0.538025	8249	1192162	Vogesella sp. LIG4
Echor34_bacteria.out	0.499022	7651	470	Acinetobacter baumannii
Echor34_bacteria.out	0.4548	6973	332411	Aquitalea magnusonii
Echor34_bacteria.out	0.438103	6717	1903179	Chromobacterium sphagni
Echor34_bacteria.out	0.384751	5899	536	Chromobacterium violaceum
Echor34_bacteria.out	0.339747	5209	29432	Psychrobacter phenylpyruvicus
Echor34_bacteria.out	0.31881	4888	2592656	Vogesella sp. YM-1
Echor34_bacteria.out	0.296178	4541	1913989	Gammaproteobacteria bacterium
Echor34_bacteria.out	0.291221	4465	168471	Laribacter hongkongensis
Echor34_bacteria.out	0.282155	4326	573	Klebsiella pneumoniae
Echor34_bacteria.out	0.27335	4191	2605945	Chromobacterium sp. 257-1
Echor34_bacteria.out	0.253261	3883	2073169	Chromobacterium sp. MWU14-2602
Echor34_bacteria.out	0.24713	3789	1945520	Psychrobacter pasteurii
Echor34_bacteria.out	0.240282	3684	519081	Aquitalea denitrificans
Echor34_bacteria.out	0.239238	3668	1628193	Chromobacterium sp. LK1
Echor34_bacteria.out	0.219084	3359	1027	Microscilla marina
Echor34_bacteria.out	0.218889	3356	190	Aquaspirillum serpens
Echor34_bacteria.out	0.211649	3245	562	Escherichia coli
Echor34_bacteria.out	0.208714	3200	1978231	Acidobacteria bacterium
Echor34_bacteria.out	0.20754	3182	394935	Chromobacterium haemolyticum
Echor34_bacteria.out	0.199843	3064	77133	uncultured bacterium
Echor34_bacteria.out	0.196908	3019	451637	Pseudogulbenkiania subflava
Echor34_bacteria.out	0.179298	2749	2026735	Deltaproteobacteria bacterium
Echor34_bacteria.out	0.175841	2696	670	Vibrio parahaemolyticus
Echor34_bacteria.out	0.171667	2632	1891241	Betaproteobacteria bacterium
Echor34_bacteria.out	0.168993	2591	1938604	Aquaspirillum sp. LM1
Echor34_bacteria.out	0.164101	2516	1945521	Psychrobacter piechaudii
Echor34_bacteria.out	0.163188	2502	536441	Chryseobacterium taklimakanense
Echor34_bacteria.out	0.159992	2453	1352	Enterococcus faecium
Echor34_bacteria.out	0.145904	2237	2026724	Chloroflexi bacterium
Echor34_bacteria.out	0.142708	2188	287	Pseudomonas aeruginosa
Echor34_bacteria.out	0.141012	2162	2026780	Planctomycetes bacterium
Echor34_bacteria.out	0.135794	2082	90241	Moraxella lincolnii
Echor34_bacteria.out	0.130707	2004	1054498	Rivicola pingtungensis
Echor34_bacteria.out	0.123728	1897	356662	Leeia oryzae
Echor34_bacteria.out	0.123011	1886	1898103	Rhodocyclaceae bacterium
Echor34_bacteria.out	0.12138	1861	1977087	Proteobacteria bacterium
Echor34_bacteria.out	0.119554	1833	2502235	Chitinivorax sp. B
Echor34_bacteria.out	0.11838	1815	45610	Psychrobacter urativorans
Echor34_bacteria.out	0.112184	1720	356302	Chitinimonas koreensis
Echor34_bacteria.out	0.111205	1705	69966	Macrococcus caseolyticus
Echor34_bacteria.out	0.10814	1658	240412	Chitinimonas taiwanensis
Echor34_bacteria.out	0.107227	1644	75922	Mycolicibacterium tusciae
Echor34_bacteria.out	0.103966	1594	45611	Psychrobacter frigidicola
Echor34_bacteria.out	0.103379	1585	857265	Amantichitinum ursilacus
Echor34_bacteria.out	0.101161	1551	2026799	Verrucomicrobia bacterium
Echor34_bacteria.out	0.1009	1547	2604685	Nitriliruptoraceae bacterium ZYF776
Echor34_bacteria.out	0.100835	1546	251747	Chromobacterium subtsugae
Echor34_bacteria.out	0.100313	1538	748280	Pseudogulbenkiania sp. NH8B
Echor34_bacteria.out	0.100183	1536	1898104	Bacteroidetes bacterium
Echor34_bacteria.out	0.566593	8687	10239	Viruses
Echor34_bacteria.out	40.0333	613790	NA	cannot be assigned to a (non-viral) species
Echor34_bacteria.out	36.3679	557593	NA	belong to a (non-viral) species with less than 0.1% of all reads
Echor34_bacteria.out	91.6506	16829893	NA	unclassified
Echor35_bacteria.out	6.07233	68011	1906665	archaeon
Echor35_bacteria.out	1.87908	21046	470	Acinetobacter baumannii
Echor35_bacteria.out	0.929542	10411	1973976	Deltaproteobacteria bacterium CG11_big_fil_rev_8_21_14_0_20_49_13
Echor35_bacteria.out	0.85615	9589	573	Klebsiella pneumoniae
Echor35_bacteria.out	0.786865	8813	1027	Microscilla marina
Echor35_bacteria.out	0.667759	7479	562	Escherichia coli
Echor35_bacteria.out	0.626242	7014	1352	Enterococcus faecium
Echor35_bacteria.out	0.59035	6612	573658	Candidatus Hodgkinia cicadicola
Echor35_bacteria.out	0.57535	6444	2026724	Chloroflexi bacterium
Echor35_bacteria.out	0.575082	6441	1002339	Psychrobacter sp. 1501(2011)
Echor35_bacteria.out	0.563654	6313	670	Vibrio parahaemolyticus
Echor35_bacteria.out	0.547672	6134	1978231	Acidobacteria bacterium
Echor35_bacteria.out	0.506869	5677	2026735	Deltaproteobacteria bacterium
Echor35_bacteria.out	0.467226	5233	77133	uncultured bacterium
Echor35_bacteria.out	0.43678	4892	69966	Macrococcus caseolyticus
Echor35_bacteria.out	0.399013	4469	2026780	Planctomycetes bacterium
Echor35_bacteria.out	0.339103	3798	2604685	Nitriliruptoraceae bacterium ZYF776
Echor35_bacteria.out	0.333657	3737	64969	Oceanospirillum multiglobuliferum
Echor35_bacteria.out	0.328032	3674	1428	Bacillus thuringiensis
Echor35_bacteria.out	0.31821	3564	29432	Psychrobacter phenylpyruvicus
Echor35_bacteria.out	0.316157	3541	210	Helicobacter pylori
Echor35_bacteria.out	0.303389	3398	1280	Staphylococcus aureus
Echor35_bacteria.out	0.298121	3339	1945520	Psychrobacter pasteurii
Echor35_bacteria.out	0.287586	3221	553151	Pseudomonas pelagia
Echor35_bacteria.out	0.273032	3058	569860	Methylovirgula ligni
Echor35_bacteria.out	0.272854	3056	287	Pseudomonas aeruginosa
Echor35_bacteria.out	0.267229	2993	33883	Microbacterium arborescens
Echor35_bacteria.out	0.263925	2956	1898104	Bacteroidetes bacterium
Echor35_bacteria.out	0.261515	2929	1396	Bacillus cereus
Echor35_bacteria.out	0.258747	2898	1891241	Betaproteobacteria bacterium
Echor35_bacteria.out	0.253747	2842	985762	Staphylococcus agnetis
Echor35_bacteria.out	0.223033	2498	584	Proteus mirabilis
Echor35_bacteria.out	0.219819	2462	948	Anaplasma phagocytophilum
Echor35_bacteria.out	0.217765	2439	86473	uncultured Gammaproteobacteria bacterium
Echor35_bacteria.out	0.217229	2433	1913989	Gammaproteobacteria bacterium
Echor35_bacteria.out	0.215176	2410	1977087	Proteobacteria bacterium
Echor35_bacteria.out	0.214729	2405	1838287	Gammaproteobacteria bacterium 2W06
Echor35_bacteria.out	0.213301	2389	955	Wolbachia pipientis
Echor35_bacteria.out	0.212854	2384	2497945	Thalassobius sp. ZQ172
Echor35_bacteria.out	0.210622	2359	2026739	Euryarchaeota archaeon
Echor35_bacteria.out	0.209819	2350	813	Chlamydia trachomatis
Echor35_bacteria.out	0.209194	2343	2219161	Crocinitomix sp. SM1701
Echor35_bacteria.out	0.209015	2341	1309	Streptococcus mutans
Echor35_bacteria.out	0.207497	2324	1913988	Alphaproteobacteria bacterium
Echor35_bacteria.out	0.206605	2314	2250255	Methanosarcinales archaeon
Echor35_bacteria.out	0.204105	2286	2026799	Verrucomicrobia bacterium
Echor35_bacteria.out	0.202944	2273	1892852	Goodfellowiella sp. AN110305
Echor35_bacteria.out	0.19964	2236	540500	Psychrobacter lutiphocae
Echor35_bacteria.out	0.193212	2164	75922	Mycolicibacterium tusciae
Echor35_bacteria.out	0.187498	2100	1869227	bacterium
Echor35_bacteria.out	0.18598	2083	1945521	Psychrobacter piechaudii
Echor35_bacteria.out	0.181426	2032	1550035	Streptomyces sp. NBRC 109706
Echor35_bacteria.out	0.180266	2019	655186	uncultured SUP05 cluster bacterium
Echor35_bacteria.out	0.179016	2005	1883427	Actinobacteria bacterium
Echor35_bacteria.out	0.17848	1999	1895707	Alphaproteobacteria bacterium 43-37
Echor35_bacteria.out	0.170176	1906	238013	Lactobacillus rennini
Echor35_bacteria.out	0.156784	1756	796379	Kangiella spongicola
Echor35_bacteria.out	0.155623	1743	1870904	Shinella sp.
Echor35_bacteria.out	0.154552	1731	2059725	Zobellella maritima
Echor35_bacteria.out	0.148302	1661	1975705	Psychrobacter sp. FDAARGOS_221
Echor35_bacteria.out	0.144016	1613	106	Runella slithyformis
Echor35_bacteria.out	0.142498	1596	35779	Aster yellows phytoplasma
Echor35_bacteria.out	0.140355	1572	83554	Chlamydia psittaci
Echor35_bacteria.out	0.135534	1518	470934	Pantoea vagans
Echor35_bacteria.out	0.127052	1423	60520	Lactobacillus paraplantarum
Echor35_bacteria.out	0.122945	1377	28901	Salmonella enterica
Echor35_bacteria.out	0.120713	1352	1909294	Rhizobiales bacterium
Echor35_bacteria.out	0.117588	1317	158836	Enterobacter hormaechei
Echor35_bacteria.out	0.113391	1270	56	Sorangium cellulosum
Echor35_bacteria.out	0.107142	1200	2053489	Candidatus Lokiarchaeota archaeon
Echor35_bacteria.out	0.107052	1199	2250277	Thermoprotei archaeon
Echor35_bacteria.out	0.104999	1176	1629334	Caedimonas varicaedens
Echor35_bacteria.out	2.00837	22494	10239	Viruses
Echor35_bacteria.out	24.6906	276538	NA	cannot be assigned to a (non-viral) species
Echor35_bacteria.out	45.2978	507342	NA	belong to a (non-viral) species with less than 0.1% of all reads
Echor35_bacteria.out	97.311	40532554	NA	unclassified
Echor36_bacteria.out	5.3478	27176	1906665	archaeon
Echor36_bacteria.out	1.91018	9707	470	Acinetobacter baumannii
Echor36_bacteria.out	1.79073	9100	1002339	Psychrobacter sp. 1501(2011)
Echor36_bacteria.out	0.930197	4727	29432	Psychrobacter phenylpyruvicus
Echor36_bacteria.out	0.904812	4598	1945520	Psychrobacter pasteurii
Echor36_bacteria.out	0.845186	4295	573	Klebsiella pneumoniae
Echor36_bacteria.out	0.727903	3699	1027	Microscilla marina
Echor36_bacteria.out	0.703896	3577	540500	Psychrobacter lutiphocae
Echor36_bacteria.out	0.633053	3217	562	Escherichia coli
Echor36_bacteria.out	0.594681	3022	1352	Enterococcus faecium
Echor36_bacteria.out	0.565557	2874	1945521	Psychrobacter piechaudii
Echor36_bacteria.out	0.536433	2726	670	Vibrio parahaemolyticus
Echor36_bacteria.out	0.512228	2603	1978231	Acidobacteria bacterium
Echor36_bacteria.out	0.495698	2519	2026735	Deltaproteobacteria bacterium
Echor36_bacteria.out	0.478775	2433	77133	uncultured bacterium
Echor36_bacteria.out	0.473659	2407	1975705	Psychrobacter sp. FDAARGOS_221
Echor36_bacteria.out	0.436466	2218	69966	Macrococcus caseolyticus
Echor36_bacteria.out	0.42643	2167	2026724	Chloroflexi bacterium
Echor36_bacteria.out	0.396716	2016	2026780	Planctomycetes bacterium
Echor36_bacteria.out	0.342207	1739	2604685	Nitriliruptoraceae bacterium ZYF776
Echor36_bacteria.out	0.283959	1443	1428	Bacillus thuringiensis
Echor36_bacteria.out	0.279039	1418	210	Helicobacter pylori
Echor36_bacteria.out	0.273726	1391	287	Pseudomonas aeruginosa
Echor36_bacteria.out	0.2692	1368	985762	Staphylococcus agnetis
Echor36_bacteria.out	0.25818	1312	64969	Oceanospirillum multiglobuliferum
Echor36_bacteria.out	0.255819	1300	75922	Mycolicibacterium tusciae
Echor36_bacteria.out	0.254638	1294	2488563	Psychrobacter pygoscelis
Echor36_bacteria.out	0.231221	1175	33883	Microbacterium arborescens
Echor36_bacteria.out	0.230434	1171	1396	Bacillus cereus
Echor36_bacteria.out	0.228663	1162	948	Anaplasma phagocytophilum
Echor36_bacteria.out	0.227088	1154	1838287	Gammaproteobacteria bacterium 2W06
Echor36_bacteria.out	0.227088	1154	1913989	Gammaproteobacteria bacterium
Echor36_bacteria.out	0.224727	1142	553151	Pseudomonas pelagia
Echor36_bacteria.out	0.214101	1088	1898104	Bacteroidetes bacterium
Echor36_bacteria.out	0.210362	1069	1869227	bacterium
Echor36_bacteria.out	0.208197	1058	655186	uncultured SUP05 cluster bacterium
Echor36_bacteria.out	0.20682	1051	2026799	Verrucomicrobia bacterium
Echor36_bacteria.out	0.205836	1046	2219161	Crocinitomix sp. SM1701
Echor36_bacteria.out	0.204065	1037	2026739	Euryarchaeota archaeon
Echor36_bacteria.out	0.201507	1024	1892852	Goodfellowiella sp. AN110305
Echor36_bacteria.out	0.191274	972	1883427	Actinobacteria bacterium
Echor36_bacteria.out	0.181435	922	796379	Kangiella spongicola
Echor36_bacteria.out	0.181238	921	1977087	Proteobacteria bacterium
Echor36_bacteria.out	0.173563	882	1309	Streptococcus mutans
Echor36_bacteria.out	0.171989	874	2590869	Janthinobacterium sp. SNU WT3
Echor36_bacteria.out	0.171595	872	584	Proteus mirabilis
Echor36_bacteria.out	0.170021	864	1913988	Alphaproteobacteria bacterium
Echor36_bacteria.out	0.159592	811	573658	Candidatus Hodgkinia cicadicola
Echor36_bacteria.out	0.159395	810	2250255	Methanosarcinales archaeon
Echor36_bacteria.out	0.150736	766	813	Chlamydia trachomatis
Echor36_bacteria.out	0.141684	720	60520	Lactobacillus paraplantarum
Echor36_bacteria.out	0.14011	712	238013	Lactobacillus rennini
Echor36_bacteria.out	0.125745	639	56	Sorangium cellulosum
Echor36_bacteria.out	0.124761	634	470934	Pantoea vagans
Echor36_bacteria.out	0.124367	632	2059725	Zobellella maritima
Echor36_bacteria.out	0.122596	623	1909294	Rhizobiales bacterium
Echor36_bacteria.out	0.118857	604	83554	Chlamydia psittaci
Echor36_bacteria.out	0.112757	573	106	Runella slithyformis
Echor36_bacteria.out	0.108625	552	158836	Enterobacter hormaechei
Echor36_bacteria.out	0.10587	538	2044944	Sphingobacteriales bacterium
Echor36_bacteria.out	0.105083	534	727	Haemophilus influenzae
Echor36_bacteria.out	0.104492	531	1773	Mycobacterium tuberculosis
Echor36_bacteria.out	0.102328	520	2250277	Thermoprotei archaeon
Echor36_bacteria.out	1.87456	9526	10239	Viruses
Echor36_bacteria.out	27.4236	139359	NA	cannot be assigned to a (non-viral) species
Echor36_bacteria.out	43.7065	222104	NA	belong to a (non-viral) species with less than 0.1% of all reads
Echor36_bacteria.out	96.3475	13404959	NA	unclassified
Echor37_bacteria.out	2.15593	32890	1906665	archaeon
Echor37_bacteria.out	1.44786	22088	536441	Chryseobacterium taklimakanense
Echor37_bacteria.out	0.866961	13226	294	Pseudomonas fluorescens
Echor37_bacteria.out	0.831302	12682	1118202	Cruoricaptor ignavus
Echor37_bacteria.out	0.650778	9928	1871047	Chryseobacterium sp.
Echor37_bacteria.out	0.624886	9533	470	Acinetobacter baumannii
Echor37_bacteria.out	0.521842	7961	2590869	Janthinobacterium sp. SNU WT3
Echor37_bacteria.out	0.46796	7139	421525	Chryseobacterium haifense
Echor37_bacteria.out	0.447639	6829	2602768	Chryseobacterium sp. legu1
Echor37_bacteria.out	0.444034	6774	237258	Cloacibacterium normanense
Echor37_bacteria.out	0.432563	6599	34085	Riemerella anatipestifer
Echor37_bacteria.out	0.403852	6161	232216	Chryseobacterium koreense
Echor37_bacteria.out	0.344726	5259	493376	Chryseobacterium palustre
Echor37_bacteria.out	0.326635	4983	573	Klebsiella pneumoniae
Echor37_bacteria.out	0.298448	4553	512012	Flavobacteriaceae bacterium JJC
Echor37_bacteria.out	0.297924	4545	2010998	Chryseobacterium sp. VAUSW3
Echor37_bacteria.out	0.285404	4354	2479858	Amniculibacterium aquaticum
Echor37_bacteria.out	0.283503	4325	1895745	Chryseobacterium sp. 39-10
Echor37_bacteria.out	0.283372	4323	1125876	Chryseobacterium frigidisoli
Echor37_bacteria.out	0.282782	4314	2039166	Chryseobacterium sp. 6424
Echor37_bacteria.out	0.279373	4262	531844	Flavobacteriaceae bacterium 3519-10
Echor37_bacteria.out	0.263379	4018	1027	Microscilla marina
Echor37_bacteria.out	0.251121	3831	77133	uncultured bacterium
Echor37_bacteria.out	0.248696	3794	619805	Soonwooa buanensis
Echor37_bacteria.out	0.24745	3775	493375	Chryseobacterium humi
Echor37_bacteria.out	0.242469	3699	1002339	Psychrobacter sp. 1501(2011)
Echor37_bacteria.out	0.233161	3557	562	Escherichia coli
Echor37_bacteria.out	0.22654	3456	540500	Psychrobacter lutiphocae
Echor37_bacteria.out	0.226212	3451	1352	Enterococcus faecium
Echor37_bacteria.out	0.225885	3446	2488563	Psychrobacter pygoscelis
Echor37_bacteria.out	0.220247	3360	1241979	Chryseobacterium carnis
Echor37_bacteria.out	0.215921	3294	1585976	Bergeyella cardium
Echor37_bacteria.out	0.215855	3293	266749	Chryseobacterium jeonii
Echor37_bacteria.out	0.214479	3272	1975705	Psychrobacter sp. FDAARGOS_221
Echor37_bacteria.out	0.213233	3253	103810	Riemerella columbina
Echor37_bacteria.out	0.212185	3237	1978231	Acidobacteria bacterium
Echor37_bacteria.out	0.210218	3207	670	Vibrio parahaemolyticus
Echor37_bacteria.out	0.204974	3127	266748	Chryseobacterium antarcticum
Echor37_bacteria.out	0.193634	2954	1608584	Chryseobacterium sp. FF12
Echor37_bacteria.out	0.193569	2953	29581	Janthinobacterium lividum
Echor37_bacteria.out	0.189832	2896	2594269	Chryseobacterium sp. SNU WT5
Echor37_bacteria.out	0.187014	2853	1664	Arthrobacter glacialis
Echor37_bacteria.out	0.185309	2827	713588	Chryseobacterium chaponense
Echor37_bacteria.out	0.180393	2752	2547600	Chryseobacterium sp. NBC 122
Echor37_bacteria.out	0.180327	2751	223556	Deinococcus indicus
Echor37_bacteria.out	0.177509	2708	2026724	Chloroflexi bacterium
Echor37_bacteria.out	0.177181	2703	1353941	Acinetobacter harbinensis
Echor37_bacteria.out	0.174297	2659	2026735	Deltaproteobacteria bacterium
Echor37_bacteria.out	0.172134	2626	980427	Deinococcus wulumuqiensis
Echor37_bacteria.out	0.161646	2466	122355	Pseudomonas psychrophila
Echor37_bacteria.out	0.157909	2409	2268028	Chryseobacterium sp. SC28
Echor37_bacteria.out	0.156271	2384	421530	Chryseobacterium bovis
Echor37_bacteria.out	0.150306	2293	69966	Macrococcus caseolyticus
Echor37_bacteria.out	0.150043	2289	1736289	Chryseobacterium sp. Leaf180
Echor37_bacteria.out	0.148339	2263	1071918	Riemerella columbipharyngis
Echor37_bacteria.out	0.146635	2237	1704277	Deinococcus sp. UR1
Echor37_bacteria.out	0.144078	2198	2026780	Planctomycetes bacterium
Echor37_bacteria.out	0.139359	2126	1898104	Bacteroidetes bacterium
Echor37_bacteria.out	0.131624	2008	287	Pseudomonas aeruginosa
Echor37_bacteria.out	0.126118	1924	29432	Psychrobacter phenylpyruvicus
Echor37_bacteria.out	0.122119	1863	573658	Candidatus Hodgkinia cicadicola
Echor37_bacteria.out	0.120874	1844	1299	Deinococcus radiodurans
Echor37_bacteria.out	0.120546	1839	2604685	Nitriliruptoraceae bacterium ZYF776
Echor37_bacteria.out	0.119104	1817	2382126	Riemerella sp.
Echor37_bacteria.out	0.117596	1794	1913989	Gammaproteobacteria bacterium
Echor37_bacteria.out	0.117465	1792	1265445	Chryseobacterium camelliae
Echor37_bacteria.out	0.115958	1769	2021391	Flavobacteriales bacterium
Echor37_bacteria.out	0.114581	1748	1428	Bacillus thuringiensis
Echor37_bacteria.out	0.111893	1707	1938608	Deinococcus sp. LM3
Echor37_bacteria.out	0.111762	1705	210	Helicobacter pylori
Echor37_bacteria.out	0.110517	1686	882211	Pseudomonas deceptionensis
Echor37_bacteria.out	0.108092	1649	553151	Pseudomonas pelagia
Echor37_bacteria.out	0.107239	1636	64969	Oceanospirillum multiglobuliferum
Echor37_bacteria.out	0.106518	1625	33883	Microbacterium arborescens
Echor37_bacteria.out	0.106518	1625	1500286	Chryseobacterium sp. OV259
Echor37_bacteria.out	0.106191	1620	1945520	Psychrobacter pasteurii
Echor37_bacteria.out	0.103438	1578	1973976	Deltaproteobacteria bacterium CG11_big_fil_rev_8_21_14_0_20_49_13
Echor37_bacteria.out	0.102651	1566	33069	Pseudomonas viridiflava
Echor37_bacteria.out	1.76722	26960	10239	Viruses
Echor37_bacteria.out	45.3557	691927	NA	cannot be assigned to a (non-viral) species
Echor37_bacteria.out	31.3807	478731	NA	belong to a (non-viral) species with less than 0.1% of all reads
Echor37_bacteria.out	92.5462	18941143	NA	unclassified
Echor38_bacteria.out	2.84783	34020	1906665	archaeon
Echor38_bacteria.out	1.24494	14872	536441	Chryseobacterium taklimakanense
Echor38_bacteria.out	0.93781	11203	470	Acinetobacter baumannii
Echor38_bacteria.out	0.72125	8616	1118202	Cruoricaptor ignavus
Echor38_bacteria.out	0.648255	7744	294	Pseudomonas fluorescens
Echor38_bacteria.out	0.557261	6657	1871047	Chryseobacterium sp.
Echor38_bacteria.out	0.403987	4826	573	Klebsiella pneumoniae
Echor38_bacteria.out	0.395616	4726	421525	Chryseobacterium haifense
Echor38_bacteria.out	0.387496	4629	34085	Riemerella anatipestifer
Echor38_bacteria.out	0.38398	4587	2602768	Chryseobacterium sp. legu1
Echor38_bacteria.out	0.368327	4400	237258	Cloacibacterium normanense
Echor38_bacteria.out	0.331912	3965	562	Escherichia coli
Echor38_bacteria.out	0.325802	3892	1027	Microscilla marina
Echor38_bacteria.out	0.321783	3844	232216	Chryseobacterium koreense
Echor38_bacteria.out	0.298177	3562	77133	uncultured bacterium
Echor38_bacteria.out	0.291983	3488	493376	Chryseobacterium palustre
Echor38_bacteria.out	0.289806	3462	1352	Enterococcus faecium
Echor38_bacteria.out	0.286374	3421	2590869	Janthinobacterium sp. SNU WT3
Echor38_bacteria.out	0.271306	3241	670	Vibrio parahaemolyticus
Echor38_bacteria.out	0.266618	3185	1978231	Acidobacteria bacterium
Echor38_bacteria.out	0.256406	3063	1895745	Chryseobacterium sp. 39-10
Echor38_bacteria.out	0.254564	3041	2479858	Amniculibacterium aquaticum
Echor38_bacteria.out	0.253141	3024	2010998	Chryseobacterium sp. VAUSW3
Echor38_bacteria.out	0.251215	3001	122355	Pseudomonas psychrophila
Echor38_bacteria.out	0.249039	2975	512012	Flavobacteriaceae bacterium JJC
Echor38_bacteria.out	0.247783	2960	2039166	Chryseobacterium sp. 6424
Echor38_bacteria.out	0.245439	2932	1125876	Chryseobacterium frigidisoli
Echor38_bacteria.out	0.241086	2880	531844	Flavobacteriaceae bacterium 3519-10
Echor38_bacteria.out	0.240752	2876	2026724	Chloroflexi bacterium
Echor38_bacteria.out	0.237236	2834	2026735	Deltaproteobacteria bacterium
Echor38_bacteria.out	0.213629	2552	619805	Soonwooa buanensis
Echor38_bacteria.out	0.211453	2526	493375	Chryseobacterium humi
Echor38_bacteria.out	0.208523	2491	69966	Macrococcus caseolyticus
Echor38_bacteria.out	0.205509	2455	1002339	Psychrobacter sp. 1501(2011)
Echor38_bacteria.out	0.204254	2440	1973976	Deltaproteobacteria bacterium CG11_big_fil_rev_8_21_14_0_20_49_13
Echor38_bacteria.out	0.203919	2436	1280	Staphylococcus aureus
Echor38_bacteria.out	0.200905	2400	882211	Pseudomonas deceptionensis
Echor38_bacteria.out	0.194627	2325	103810	Riemerella columbina
Echor38_bacteria.out	0.189019	2258	2026780	Planctomycetes bacterium
Echor38_bacteria.out	0.187847	2244	266749	Chryseobacterium jeonii
Echor38_bacteria.out	0.186591	2229	198620	Pseudomonas koreensis
Echor38_bacteria.out	0.185168	2212	1241979	Chryseobacterium carnis
Echor38_bacteria.out	0.184331	2202	540500	Psychrobacter lutiphocae
Echor38_bacteria.out	0.177048	2115	1585976	Bergeyella cardium
Echor38_bacteria.out	0.175457	2096	2594269	Chryseobacterium sp. SNU WT5
Echor38_bacteria.out	0.174034	2079	2488563	Psychrobacter pygoscelis
Echor38_bacteria.out	0.173281	2070	266748	Chryseobacterium antarcticum
Echor38_bacteria.out	0.172779	2064	573658	Candidatus Hodgkinia cicadicola
Echor38_bacteria.out	0.168677	2015	1608584	Chryseobacterium sp. FF12
Echor38_bacteria.out	0.165831	1981	713588	Chryseobacterium chaponense
Echor38_bacteria.out	0.161394	1928	1428	Bacillus thuringiensis
Echor38_bacteria.out	0.160808	1921	1975705	Psychrobacter sp. FDAARGOS_221
Echor38_bacteria.out	0.160724	1920	1898104	Bacteroidetes bacterium
Echor38_bacteria.out	0.156455	1869	2547600	Chryseobacterium sp. NBC 122
Echor38_bacteria.out	0.152856	1826	2604685	Nitriliruptoraceae bacterium ZYF776
Echor38_bacteria.out	0.152521	1822	287	Pseudomonas aeruginosa
Echor38_bacteria.out	0.151767	1813	29581	Janthinobacterium lividum
Echor38_bacteria.out	0.1516	1811	1664	Arthrobacter glacialis
Echor38_bacteria.out	0.14934	1784	210	Helicobacter pylori
Echor38_bacteria.out	0.145322	1736	64969	Oceanospirillum multiglobuliferum
Echor38_bacteria.out	0.144987	1732	33069	Pseudomonas viridiflava
Echor38_bacteria.out	0.137369	1641	1396	Bacillus cereus
Echor38_bacteria.out	0.135444	1618	553151	Pseudomonas pelagia
Echor38_bacteria.out	0.135444	1618	1071918	Riemerella columbipharyngis
Echor38_bacteria.out	0.134523	1607	1353941	Acinetobacter harbinensis
Echor38_bacteria.out	0.133602	1596	359110	Pseudomonas extremaustralis
Echor38_bacteria.out	0.133351	1593	33883	Microbacterium arborescens
Echor38_bacteria.out	0.129919	1552	421530	Chryseobacterium bovis
Echor38_bacteria.out	0.129584	1548	1736289	Chryseobacterium sp. Leaf180
Echor38_bacteria.out	0.12724	1520	1913989	Gammaproteobacteria bacterium
Echor38_bacteria.out	0.123808	1479	2268028	Chryseobacterium sp. SC28
Echor38_bacteria.out	0.115353	1378	34059	Moraxella atlantae
Echor38_bacteria.out	0.114851	1372	584	Proteus mirabilis
Echor38_bacteria.out	0.113679	1358	29432	Psychrobacter phenylpyruvicus
Echor38_bacteria.out	0.110079	1315	2021391	Flavobacteriales bacterium
Echor38_bacteria.out	0.108573	1297	1977087	Proteobacteria bacterium
Echor38_bacteria.out	0.107652	1286	296	Pseudomonas fragi
Echor38_bacteria.out	0.10648	1272	1838287	Gammaproteobacteria bacterium 2W06
Echor38_bacteria.out	0.105475	1260	76761	Pseudomonas veronii
Echor38_bacteria.out	0.103717	1239	317	Pseudomonas syringae
Echor38_bacteria.out	0.103717	1239	75922	Mycolicibacterium tusciae
Echor38_bacteria.out	0.10355	1237	2026799	Verrucomicrobia bacterium
Echor38_bacteria.out	0.101708	1215	1265445	Chryseobacterium camelliae
Echor38_bacteria.out	0.101374	1211	2382126	Riemerella sp.
Echor38_bacteria.out	0.10129	1210	1869227	bacterium
Echor38_bacteria.out	3.16351	37791	10239	Viruses
Echor38_bacteria.out	40.1214	479287	NA	cannot be assigned to a (non-viral) species
Echor38_bacteria.out	34.3695	410575	NA	belong to a (non-viral) species with less than 0.1% of all reads
Echor38_bacteria.out	94.4749	20426729	NA	unclassified
Echor39_bacteria.out	2.76499	62063	1906665	archaeon
Echor39_bacteria.out	1.33939	30064	1973976	Deltaproteobacteria bacterium CG11_big_fil_rev_8_21_14_0_20_49_13
Echor39_bacteria.out	0.918739	20622	540500	Psychrobacter lutiphocae
Echor39_bacteria.out	0.90475	20308	2488563	Psychrobacter pygoscelis
Echor39_bacteria.out	0.876014	19663	1002339	Psychrobacter sp. 1501(2011)
Echor39_bacteria.out	0.837433	18797	1975705	Psychrobacter sp. FDAARGOS_221
Echor39_bacteria.out	0.82879	18603	223556	Deinococcus indicus
Echor39_bacteria.out	0.791099	17757	470	Acinetobacter baumannii
Echor39_bacteria.out	0.755726	16963	536441	Chryseobacterium taklimakanense
Echor39_bacteria.out	0.747795	16785	573658	Candidatus Hodgkinia cicadicola
Echor39_bacteria.out	0.639625	14357	980427	Deinococcus wulumuqiensis
Echor39_bacteria.out	0.604919	13578	1704277	Deinococcus sp. UR1
Echor39_bacteria.out	0.534795	12004	1938608	Deinococcus sp. LM3
Echor39_bacteria.out	0.451573	10136	29432	Psychrobacter phenylpyruvicus
Echor39_bacteria.out	0.43696	9808	1118202	Cruoricaptor ignavus
Echor39_bacteria.out	0.432951	9718	1280	Staphylococcus aureus
Echor39_bacteria.out	0.419362	9413	1502	Clostridium perfringens
Echor39_bacteria.out	0.418427	9392	1299	Deinococcus radiodurans
Echor39_bacteria.out	0.399492	8967	573	Klebsiella pneumoniae
Echor39_bacteria.out	0.398646	8948	2026724	Chloroflexi bacterium
Echor39_bacteria.out	0.365856	8212	1871047	Chryseobacterium sp.
Echor39_bacteria.out	0.362604	8139	569860	Methylovirgula ligni
Echor39_bacteria.out	0.360956	8102	1945520	Psychrobacter pasteurii
Echor39_bacteria.out	0.349016	7834	1027	Microscilla marina
Echor39_bacteria.out	0.347679	7804	86473	uncultured Gammaproteobacteria bacterium
Echor39_bacteria.out	0.343981	7721	1891241	Betaproteobacteria bacterium
Echor39_bacteria.out	0.343625	7713	955	Wolbachia pipientis
Echor39_bacteria.out	0.307627	6905	562	Escherichia coli
Echor39_bacteria.out	0.29297	6576	1352	Enterococcus faecium
Echor39_bacteria.out	0.287401	6451	2497945	Thalassobius sp. ZQ172
Echor39_bacteria.out	0.271719	6099	1895707	Alphaproteobacteria bacterium 43-37
Echor39_bacteria.out	0.271095	6085	1978231	Acidobacteria bacterium
Echor39_bacteria.out	0.270873	6080	77133	uncultured bacterium
Echor39_bacteria.out	0.261071	5860	34085	Riemerella anatipestifer
Echor39_bacteria.out	0.257864	5788	2528713	Deinococcus fonticola
Echor39_bacteria.out	0.25675	5763	670	Vibrio parahaemolyticus
Echor39_bacteria.out	0.256037	5747	2568654	Deinococcus sp. KSM4-11
Echor39_bacteria.out	0.254611	5715	1913989	Gammaproteobacteria bacterium
Echor39_bacteria.out	0.252027	5657	2054903	Deinococcus koreensis
Echor39_bacteria.out	0.249889	5609	856736	Deinococcus reticulitermitis
Echor39_bacteria.out	0.248196	5571	421525	Chryseobacterium haifense
Echor39_bacteria.out	0.246369	5530	237258	Cloacibacterium normanense
Echor39_bacteria.out	0.239954	5386	2026735	Deltaproteobacteria bacterium
Echor39_bacteria.out	0.238261	5348	317577	Deinococcus ficus
Echor39_bacteria.out	0.236256	5303	1945521	Psychrobacter piechaudii
Echor39_bacteria.out	0.236167	5301	2202254	Deinococcus irradiatisoli
Echor39_bacteria.out	0.235365	5283	1550035	Streptomyces sp. NBRC 109706
Echor39_bacteria.out	0.231355	5193	35779	Aster yellows phytoplasma
Echor39_bacteria.out	0.230732	5179	2602768	Chryseobacterium sp. legu1
Echor39_bacteria.out	0.217812	4889	2320857	Deinococcus sp. K2S05-167
Echor39_bacteria.out	0.216208	4853	232216	Chryseobacterium koreense
Echor39_bacteria.out	0.208367	4677	2682977	Deinococcus sp. HMF7620
Echor39_bacteria.out	0.20703	4647	1870904	Shinella sp.
Echor39_bacteria.out	0.205961	4623	310783	Deinococcus deserti
Echor39_bacteria.out	0.200704	4505	90241	Moraxella lincolnii
Echor39_bacteria.out	0.19411	4357	249408	Deinococcus marmoris
Echor39_bacteria.out	0.192952	4331	69966	Macrococcus caseolyticus
Echor39_bacteria.out	0.19019	4269	2136176	Deinococcus sp. OD32
Echor39_bacteria.out	0.183195	4112	2026780	Planctomycetes bacterium
Echor39_bacteria.out	0.177805	3991	502394	Deinococcus gobiensis
Echor39_bacteria.out	0.175221	3933	493376	Chryseobacterium palustre
Echor39_bacteria.out	0.172949	3882	45610	Psychrobacter urativorans
Echor39_bacteria.out	0.168271	3777	1898104	Bacteroidetes bacterium
Echor39_bacteria.out	0.165018	3704	45611	Psychrobacter frigidicola
Echor39_bacteria.out	0.158781	3564	1895745	Chryseobacterium sp. 39-10
Echor39_bacteria.out	0.158425	3556	512012	Flavobacteriaceae bacterium JJC
Echor39_bacteria.out	0.157534	3536	1629334	Caedimonas varicaedens
Echor39_bacteria.out	0.156999	3524	1125876	Chryseobacterium frigidisoli
Echor39_bacteria.out	0.156019	3502	1736338	Deinococcus sp. Leaf326
Echor39_bacteria.out	0.155217	3484	64969	Oceanospirillum multiglobuliferum
Echor39_bacteria.out	0.15339	3443	2479858	Amniculibacterium aquaticum
Echor39_bacteria.out	0.152544	3424	2010998	Chryseobacterium sp. VAUSW3
Echor39_bacteria.out	0.150851	3386	1428	Bacillus thuringiensis
Echor39_bacteria.out	0.150807	3385	2604685	Nitriliruptoraceae bacterium ZYF776
Echor39_bacteria.out	0.146752	3294	2545754	Deinococcus sp. S9
Echor39_bacteria.out	0.14595	3276	2039166	Chryseobacterium sp. 6424
Echor39_bacteria.out	0.14546	3265	531844	Flavobacteriaceae bacterium 3519-10
Echor39_bacteria.out	0.145371	3263	2283318	Moraxellaceae bacterium HYN0046
Echor39_bacteria.out	0.144658	3247	309885	Deinococcus hopiensis
Echor39_bacteria.out	0.139179	3124	57498	Deinococcus grandis
Echor39_bacteria.out	0.138599	3111	34059	Moraxella atlantae
Echor39_bacteria.out	0.135837	3049	493375	Chryseobacterium humi
Echor39_bacteria.out	0.135748	3047	287	Pseudomonas aeruginosa
Echor39_bacteria.out	0.135392	3039	619805	Soonwooa buanensis
Echor39_bacteria.out	0.131115	2943	210	Helicobacter pylori
Echor39_bacteria.out	0.130669	2933	553151	Pseudomonas pelagia
Echor39_bacteria.out	0.127462	2861	249403	Deinococcus frigens
Echor39_bacteria.out	0.126303	2835	33883	Microbacterium arborescens
Echor39_bacteria.out	0.125813	2824	1211322	Deinococcus metallilatus
Echor39_bacteria.out	0.123764	2778	1977087	Proteobacteria bacterium
Echor39_bacteria.out	0.12363	2775	103810	Riemerella columbina
Echor39_bacteria.out	0.121447	2726	1396	Bacillus cereus
Echor39_bacteria.out	0.119576	2684	1585976	Bergeyella cardium
Echor39_bacteria.out	0.116368	2612	1737569	Deinococcus planocerae
Echor39_bacteria.out	0.115923	2602	266749	Chryseobacterium jeonii
Echor39_bacteria.out	0.114987	2581	1476583	Deinococcus phoenicis
Echor39_bacteria.out	0.11472	2575	519440	Deinococcus aquatilis
Echor39_bacteria.out	0.114542	2571	813	Chlamydia trachomatis
Echor39_bacteria.out	0.113339	2544	1241979	Chryseobacterium carnis
Echor39_bacteria.out	0.10777	2419	1182568	Deinococcus puniceus
Echor39_bacteria.out	0.106923	2400	2594269	Chryseobacterium sp. SNU WT5
Echor39_bacteria.out	0.104607	2348	266748	Chryseobacterium antarcticum
Echor39_bacteria.out	0.103849	2331	1608584	Chryseobacterium sp. FF12
Echor39_bacteria.out	0.103627	2326	713588	Chryseobacterium chaponense
Echor39_bacteria.out	0.100508	2256	197	Campylobacter jejuni
Echor39_bacteria.out	0.920165	20654	10239	Viruses
Echor39_bacteria.out	34.1772	767141	NA	cannot be assigned to a (non-viral) species
Echor39_bacteria.out	33.0086	740910	NA	belong to a (non-viral) species with less than 0.1% of all reads
Echor39_bacteria.out	94.6314	39565504	NA	unclassified
Echor40_bacteria.out	3.45004	34872	1906665	archaeon
Echor40_bacteria.out	1.01784	10288	470	Acinetobacter baumannii
Echor40_bacteria.out	0.885661	8952	540500	Psychrobacter lutiphocae
Echor40_bacteria.out	0.843119	8522	1002339	Psychrobacter sp. 1501(2011)
Echor40_bacteria.out	0.841734	8508	2488563	Psychrobacter pygoscelis
Echor40_bacteria.out	0.823728	8326	223556	Deinococcus indicus
Echor40_bacteria.out	0.810174	8189	1975705	Psychrobacter sp. FDAARGOS_221
Echor40_bacteria.out	0.794839	8034	1973976	Deltaproteobacteria bacterium CG11_big_fil_rev_8_21_14_0_20_49_13
Echor40_bacteria.out	0.718165	7259	980427	Deinococcus wulumuqiensis
Echor40_bacteria.out	0.58678	5931	1704277	Deinococcus sp. UR1
Echor40_bacteria.out	0.527221	5329	1938608	Deinococcus sp. LM3
[truncated: 861 more rows]
