# Supplementary material for: Patterns of Microbiome Variation Among Infrapopulations of Permanent Bloodsucking Parasites
Source: Frontiers journal article supplement (doi:10.3389/fmicb.2021.642543), 2021-04-16
Supplement: Table_4.XLS [file Table_4.XLS]

## Sheet: Sheet 1 - Table_S1
SampleID	Organism	Host	Tissue	Location	Collection_date	Host_ID	Bioproject_accession	SRA_accession	Sequencing_lane_ID	Number_of_(raw)_reads_R1	Number_of_(raw)_reads_R2	Number_of_reads_after_quality_trimming_and_host_filtering_R1	Number_of_reads_after_quality_trimming_and_host_filtering_R2	%_of_R1_reads_removed_during_preprocessing	%_of_R2_reads_removed_during_preprocessing	%_of_reads_removed_(average)
Echor02	Echinophthirius horridus	Pusa hispida saimensis	whole insect	Finland: Lake Saimaa, Pihlajavesi	15-April-2014	TU-14	PRJNA490904	SRR8145901	16	66363601	66363601	66338996	66338996	0.037076	0.037076	0.037076
Echor03	Echinophthirius horridus	Pusa hispida saimensis	whole insect	Finland: Lake Saimaa, Haukivesi	1-June-2012	US-12	PRJNA490905	SRR8145902	16	72462060	72462060	72443270	72443270	0.0259308	0.0259308	0.0259308
Echor04	Echinophthirius horridus	Pusa hispida saimensis	whole insect	Finland: Lake Saimaa, Haukivesi	22-May-2009	PA-09	PRJNA490906	SRR8145903	16	62524626	62524626	62510369	62510369	0.0228022	0.0228022	0.0228022
Echor18	Echinophthirius horridus	Pusa hispida saimensis	whole insect	Finland: Lake Saimaa, Pihlajavesi	15-April-2014	TU-14	PRJNA490920	SRR8145917	32	27137528	27137528	27129199	27129199	0.0306918	0.0306918	0.0306918
Echor19	Echinophthirius horridus	Pusa hispida saimensis	whole insect	Finland: Lake Saimaa, Haukivesi	1-June-2012	US-12	PRJNA490921	SRR8145918	32	23683288	23683288	23674749	23674749	0.036055	0.036055	0.036055
Echor20	Echinophthirius horridus	Pusa hispida saimensis	whole insect	Finland: Lake Saimaa, Haukivesi	22-May-2009	PA-09	PRJNA490922	SRR8145919	32	22404415	22404415	22394664	22394664	0.0435227	0.0435227	0.0435227
Echor21	Echinophthirius horridus	Pusa hispida saimensis	whole insect	Finland: Lake Saimaa, Siikalahti	22-April-2014	PE-14	PRJNA490923	SRR8145920	32	34373982	34373982	34361611	34361611	0.0359894	0.0359894	0.0359894
Echor22	Echinophthirius horridus	Pusa hispida saimensis	whole insect	Finland: Lake Saimaa, Siikalahti	22-April-2014	PE-14	PRJNA490924	SRR8145921	32	27927588	27927588	27919249	27919249	0.0298594	0.0298594	0.0298594
Echor23	Echinophthirius horridus	Pusa hispida saimensis	whole insect	Finland: Lake Saimaa, Haukivesi	20-May-2012	AS-12	PRJNA490925	SRR8145922	32	30203845	30203845	30194392	30194392	0.0312973	0.0312973	0.0312973
Echor24	Echinophthirius horridus	Pusa hispida saimensis	whole insect	Finland: Lake Saimaa, Haukivesi	20-May-2012	AS-12	PRJNA490926	SRR8145923	32	26377736	26377736	26369515	26369515	0.0311664	0.0311664	0.0311664
Echor25	Echinophthirius horridus	Pusa hispida saimensis	whole insect	Finland: Lake Saimaa, Haukivesi	14-April-2011	LI-11	PRJNA490927	SRR8145924	32	32422755	32422755	32412280	32412280	0.0323076	0.0323076	0.0323076
Echor26	Echinophthirius horridus	Pusa hispida saimensis	whole insect	Finland: Lake Saimaa, Haukivesi	14-April-2011	LI-11	PRJNA490928	SRR8145925	32	9198565	9198565	9195263	9195263	0.0358969	0.0358969	0.0358969
Echor27	Echinophthirius horridus	Pusa hispida saimensis	whole insect	Finland: Lake Saimaa, Joutenvesi	1-May-2010	VA-10	PRJNA490929	SRR8145926	32	26773924	26773924	26763121	26763121	0.040349	0.040349	0.040349
Echor28	Echinophthirius horridus	Pusa hispida saimensis	whole insect	Finland: Lake Saimaa, Joutenvesi	1-May-2010	VA-10	PRJNA490930	SRR8145927	32	26232143	26232143	26223355	26223355	0.0335009	0.0335009	0.0335009
Echor29	Echinophthirius horridus	Pusa hispida saimensis	whole insect	Finland: Lake Saimaa, Haukivesi	2-May-2010	RA-10	PRJNA490931	SRR8145928	32	25495121	25495121	25486302	25486302	0.0345909	0.0345909	0.0345909
Echor30	Echinophthirius horridus	Pusa hispida saimensis	whole insect	Finland: Lake Saimaa, Haukivesi	2-May-2010	RA-10	PRJNA490932	SRR8145929	32	25105082	25105082	25095348	25095348	0.038773	0.038773	0.038773
Echor31	Echinophthirius horridus	Pusa hispida saimensis	whole insect	Finland: Lake Saimaa, Etela-Saimaa	11-July-2016	2660	PRJNA490933	SRR8145930	32	22914937	22914937	22904593	22904593	0.0451409	0.0451409	0.0451409
Echor32	Echinophthirius horridus	Pusa hispida saimensis	whole insect	Finland: Lake Saimaa, Etela-Saimaa	11-July-2016	2660	PRJNA490934	SRR8145931	32	41115292	41115292	41102766	41102766	0.0304656	0.0304656	0.0304656
Echor33	Echinophthirius horridus	Pusa hispida saimensis	whole insect	Finland: Lake Saimaa, Petranselka	12-July-2012	2555	PRJNA490935	SRR8145932	32	32074398	32074398	32061246	32061246	0.0410047	0.0410047	0.0410047
Echor34	Echinophthirius horridus	Pusa hispida saimensis	whole insect	Finland: Lake Saimaa, Petranselka	12-July-2012	2555	PRJNA490936	SRR8145933	32	18371917	18371917	18363093	18363093	0.0480298	0.0480298	0.0480298
Echor35	Echinophthirius horridus	Pusa hispida saimensis	whole insect	Finland: Lake Saimaa, Etela-Saimaa	30-May-2016	2653	PRJNA490937	SRR8145934	32	41663832	41663832	41652568	41652568	0.0270354	0.0270354	0.0270354
Echor36	Echinophthirius horridus	Pusa hispida saimensis	whole insect	Finland: Lake Saimaa, Etela-Saimaa	30-May-2016	2653	PRJNA490938	SRR8145935	32	13918820	13918820	13913131	13913131	0.0408727	0.0408727	0.0408727
Echor37	Echinophthirius horridus	Pusa hispida saimensis	whole insect	Finland: Lake Saimaa, Lepistonselka	1-Feb-2015	2621	PRJNA490939	SRR8145936	32	20474497	20474497	20466701	20466701	0.0380766	0.0380766	0.0380766
Echor38	Echinophthirius horridus	Pusa hispida saimensis	whole insect	Finland: Lake Saimaa, Lepistonselka	1-Feb-2015	2621	PRJNA490940	SRR8145937	32	21627071	21627071	21621321	21621321	0.0265871	0.0265871	0.0265871
Echor39	Echinophthirius horridus	Pusa hispida saimensis	whole insect	Finland: Lake Saimaa, Pihlajavesi	30-Aug-2016	2664	PRJNA490941	SRR8145938	32	41821756	41821756	41810102	41810102	0.0278659	0.0278659	0.0278659
Echor40	Echinophthirius horridus	Pusa hispida saimensis	whole insect	Finland: Lake Saimaa, Pihlajavesi	30-Aug-2016	2664	PRJNA490942	SRR8145939	32	22122308	22122308	22115139	22115139	0.0324062	0.0324062	0.0324062
Echor41	Echinophthirius horridus	Pusa hispida saimensis	whole insect	Finland: Lake Saimaa, Pihlajavesi	18-March-2016	2642	PRJNA490943	SRR8145940	32	28000072	28000072	27990095	27990095	0.035632	0.035632	0.035632
Echor42	Echinophthirius horridus	Pusa hispida saimensis	whole insect	Finland: Lake Saimaa, Pihlajavesi	18-March-2016	2642	PRJNA490944	SRR8145941	32	25490934	25490934	25482393	25482393	0.033506	0.033506	0.033506
Echor43	Echinophthirius horridus	Pusa hispida saimensis	whole insect	Finland: Lake Saimaa, Joutenvesi	11-July-2015	2638	PRJNA490945	SRR8145942	32	23349869	23349869	23341252	23341252	0.0369039	0.0369039	0.0369039
Echor44	Echinophthirius horridus	Pusa hispida saimensis	whole insect	Finland: Lake Saimaa, Joutenvesi	11-July-2015	2638	PRJNA490946	SRR8145943	32	26429004	26429004	26421219	26421219	0.0294563	0.0294563	0.0294563
Echor45	Echinophthirius horridus	Pusa hispida saimensis	whole insect	Finland: Lake Saimaa, Orivesi	24-May-2014	2610	PRJNA490947	SRR8145944	32	39384973	39384973	39369679	39369679	0.0388321	0.0388321	0.0388321
Echor46	Echinophthirius horridus	Pusa hispida saimensis	whole insect	Finland: Lake Saimaa, Orivesi	24-May-2014	2610	PRJNA490948	SRR8145945	32	23356858	23356858	23349250	23349250	0.0325729	0.0325729	0.0325729
Echor47	Echinophthirius horridus	Pusa hispida saimensis	whole insect	Finland: Lake Saimaa, Haukivesi	12-Nov-2017	2703	PRJNA490949	SRR8145946	32	42360689	42360689	42349860	42349860	0.0255638	0.0255638	0.0255638
Echor48	Echinophthirius horridus	Pusa hispida saimensis	whole insect	Finland: Lake Saimaa, Haukivesi	12-Nov-2017	2703	PRJNA490950	SRR8145947	32	22087033	22087033	22078412	22078412	0.039032	0.039032	0.039032
